# Supplementary material for: Nickel-catalyzed cross-electrophile allylation of vinyl bromides and the modification of anti-tumour natural medicine β-elemene
Source: Royal Society of Chemistry journal article supplement (doi:10.1039/d2sc02054h), 2022-01-01
Supplement: d2sc02054h1.pdf [file d2sc02054h1.pdf]

Supporting Information

**Nickel-Catalyzed Cross-Electrophile Allylation of Vinyl  
Bromides and The Modification of Anti-Tumour Natural  
Medicine  $\beta$ -Elemene**

Yang Ye,<sup>\*,a,b,†</sup> Xiang Qi,<sup>a,b,†</sup> Bing Xu,<sup>a,b</sup> Ying Lin,<sup>a,b</sup> Huan Xiang,<sup>a,b</sup> Ling, Zou,<sup>a,b</sup> Xiang-Yang Ye<sup>\*,a,b</sup>  
and Tian Xie<sup>\*,a,b</sup>

<sup>a</sup>*School of Pharmacy, Hangzhou Normal University, Hangzhou, Zhejiang 311121, PR China*

<sup>b</sup>*Key Laboratory of Elemene Class Anti-Cancer Chinese Medicines; Engineering Laboratory of Development and Application of Traditional Chinese Medicines; Collaborative Innovation Center of Traditional Chinese Medicines of Zhejiang Province, Hangzhou Normal University, Hangzhou, Zhejiang 311121, China*

*yangye@hznu.edu.cn; yeyang0711@163.com*

***Table of Contents***

|              |                                                                          |                 |
|--------------|--------------------------------------------------------------------------|-----------------|
| <b>I.</b>    | <b>General Information.....</b>                                          | <b>S2</b>       |
| <b>II.</b>   | <b>Details of Optimization.....</b>                                      | <b>S3-S7</b>    |
| <b>III.</b>  | <b>Cross-Coupling of Allylic Acetates with Vinyl Bromides.....</b>       | <b>S7-S31</b>   |
| <b>IV.</b>   | <b>Vinylation of <math>\beta</math>-Elemene.....</b>                     | <b>S31-S37</b>  |
| <b>V.</b>    | <b>In Vitro Anti-Tumour Activity of Compound 55.....</b>                 | <b>S38-S39</b>  |
| <b>VI.</b>   | <b>Preparation of Alkenyl Bromides .....</b>                             | <b>S39-S42</b>  |
| <b>VII.</b>  | <b>Preparation of <math>\beta</math>-Elemene Derived-Acetate 1c.....</b> | <b>S42-S43</b>  |
| <b>VIII.</b> | <b>Mechanistic Investigations .....</b>                                  | <b>S44</b>      |
| <b>IX.</b>   | <b>References.....</b>                                                   | <b>S45</b>      |
| <b>X.</b>    | <b>Spectroscopic Data (NMR Spectrum and HPLC Trace) .....</b>            | <b>S46-S108</b> |

## I. General Information

### 1. Chemicals and Reagents

All manipulations were carried out under an atmosphere of nitrogen using standard Schlenk or glove box techniques. DMA (*N,N*-dimethylacetamide, 99.5%, extra dry, Acros) was purchased and used directly. Deuterated solvents were used as received ( $\text{CDCl}_3$  from Maclin Co., China).  $\text{NiF}_2$  (Alfa Aesar),  $\text{NiCl}_2$  (Alfa Aesar),  $\text{NiBr}_2$  (Alfa Aesar),  $\text{NiI}_2$  (Alfa Aesar),  $\text{Ni}(\text{COD})_2$  (Strem),  $\text{Ni}(\text{OTf})_2$  (Alfa Aesar),  $\text{Ni}(\text{acac})_2$  (Maclin Co., China),  $\text{NiCl}_2(\text{PPh})_3$  (Alfa Aesar),  $\text{Co}(\text{acac})_2$  (Alfa Aesar),  $\text{Cu}(\text{acac})_2$  (Alfa Aesar) were used as received. Zinc powder (Aladdin) was activated with hydrochloric acid before use. Anhydrous  $\text{MgCl}_2$  (Alfa Aesar) were purchased and used directly. 4,4'-Di-*tert*-butyl-2,2'-bipyridine (>99%, Alfa Aesar) was purchased and used directly. Procedures for the synthesis of the vinyl bromides used in this study have been reported in our previous publications.<sup>1</sup> Unless otherwise noted, all other reagents and starting materials were purchased from commercial sources and used without further purification.

### 2. Physical Methods

Column chromatography was performed using silica gel 200-300 mesh (purchased from Qingdao-Haiyang Co., China) as the solid support. All NMR spectra were recorded on Bruker Avance 500 MHz spectrometers.  $^1\text{H}$  NMR and  $^{13}\text{C}$  NMR chemical shifts are reported in  $\delta$  units, parts per million (ppm) relative to the chemical shift of residual solvent. Reference peaks for chloroform in  $^1\text{H}$  NMR and  $^{13}\text{C}$  NMR spectra were set at 7.26 ppm and 77.16 ppm, respectively. High-resolution mass spectra (HRMS) were obtained using a Bruker APEXIII 7.0 or IonSpec 4.7 TESLA FTMS instruments. Melting points were recorded on a micro melting point apparatus (X-4, YUHUA Co., Ltd, Gongyi, China). GC chromatograms were recorded on a GCMS-QP2010 SE (SHIMADZU) using an Agilent column CP7502 and Rxi-5 ms (Restek). Ultra Fast liquid chromatography was performed on Shimadzu Chromatographs (LC-2030 Plus) using Daicel Chiralcel columns (250 mm).

## II. Details of Optimization

### 1. Reaction Conditions Optimization

**Table S1.** Screening the catalyst for the reaction of **1a** with **1b**.

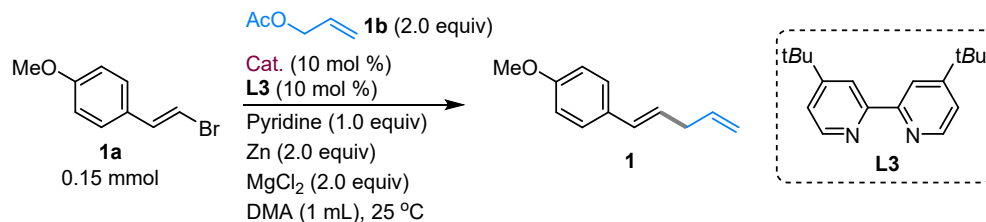

| entry | Cat.                                                  | yield% <sup>a</sup> |
|-------|-------------------------------------------------------|---------------------|
| 1     | NiCl <sub>2</sub> •DME                                | 40                  |
| 2     | NiBr <sub>2</sub> •DME                                | 33                  |
| 3     | Ni(acac) <sub>2</sub>                                 | 46                  |
| 4     | Ni(COD) <sub>2</sub>                                  | 17                  |
| 5     | NiI <sub>2</sub>                                      | 43                  |
| 6     | NiBr <sub>2</sub>                                     | 27                  |
| 7     | NiCl <sub>2</sub>                                     | 64                  |
| 8     | NiF <sub>2</sub>                                      | 24                  |
| 9     | Ni(TMHD) <sub>2</sub>                                 | 44                  |
| 10    | Ni(ClO <sub>4</sub> ) <sub>2</sub> •4(py)             | 36                  |
| 11    | NiCl <sub>2</sub> (PPh <sub>3</sub> ) <sub>2</sub>    | 79                  |
| 12    | Ni(OTf) <sub>2</sub>                                  | 29                  |
| 13    | Ni(ClO <sub>4</sub> ) <sub>2</sub> •6H <sub>2</sub> O | 34                  |
| 14    | Co(acac) <sub>2</sub>                                 | no reaction         |
| 15    | Cu(acac) <sub>2</sub>                                 | no reaction         |
| 16    | Fe(acac) <sub>3</sub>                                 | no reaction         |

<sup>a</sup>NMR yield using 2,5-dimethyl furan as the internal standard from a mixture containing other impurities after a quick flash column chromatography.

**Table S2.** Screening the ligand for the reaction of **1a** with **1b**.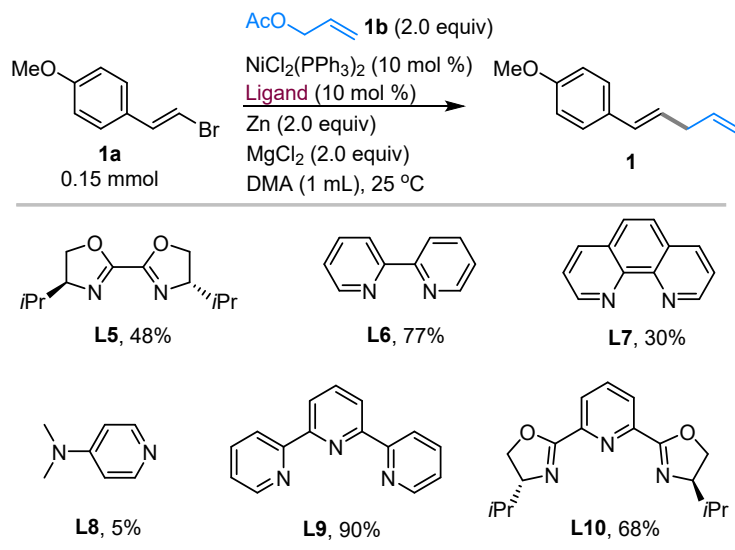

<sup>a</sup>NMR yield using 2,5-dimethyl furan as the internal standard from a mixture containing other impurities after a quick flash column chromatography; <sup>b</sup>Not detected.

**Table S3.** Screening the variations for the reaction of **1a** with **1b**.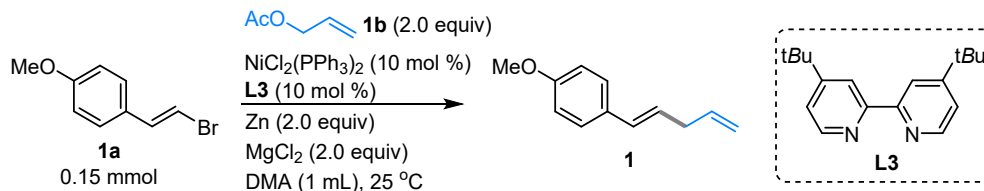

| entry | Variations                                                                                                                            | yield% <sup>a</sup> |
|-------|---------------------------------------------------------------------------------------------------------------------------------------|---------------------|
| 1     | none                                                                                                                                  | 96                  |
| 2     | <b>1a</b> : <b>1b</b> = 1.0 : 1.5                                                                                                     | 26                  |
| 3     | <b>1a</b> : <b>1b</b> = 1.0 : 1.2                                                                                                     | 38                  |
| 4     | <b>1a</b> : <b>1b</b> = 1.0 : 1.0                                                                                                     | trace               |
| 5     | <b>1a</b> : <b>1b</b> = 1.2 : 1.0                                                                                                     | 64                  |
| 6     | <b>1a</b> : <b>1b</b> = 1.5 : 1.0                                                                                                     | 86                  |
| 7     | <b>1a</b> : <b>1b</b> = 2.0 : 1.0                                                                                                     | 79                  |
| 8     | 0°C                                                                                                                                   | 59                  |
| 9     | 40°C                                                                                                                                  | 76                  |
| 10    | 60°C                                                                                                                                  | 65                  |
| 11    | Mn instead of Zn                                                                                                                      | 68                  |
| 12    | TDAE instead of Zn                                                                                                                    | 88                  |
| 13    | NiCl <sub>2</sub> (10 mol %) and PPh <sub>3</sub> (20 mol %) instead of NiCl <sub>2</sub> (PPh <sub>3</sub> ) <sub>2</sub> (10 mol %) | 42                  |

<sup>a</sup>NMR yield using 2,5-dimethyl furan as the internal standard from a mixture containing other impurities after a quick flash column chromatography.

**Table S4.** Screening the chiral ligands for the Ni-catalyzed enantioselective reaction of (*E*)-4-phenylbut-3-en-2-yl acetate with **1a**.

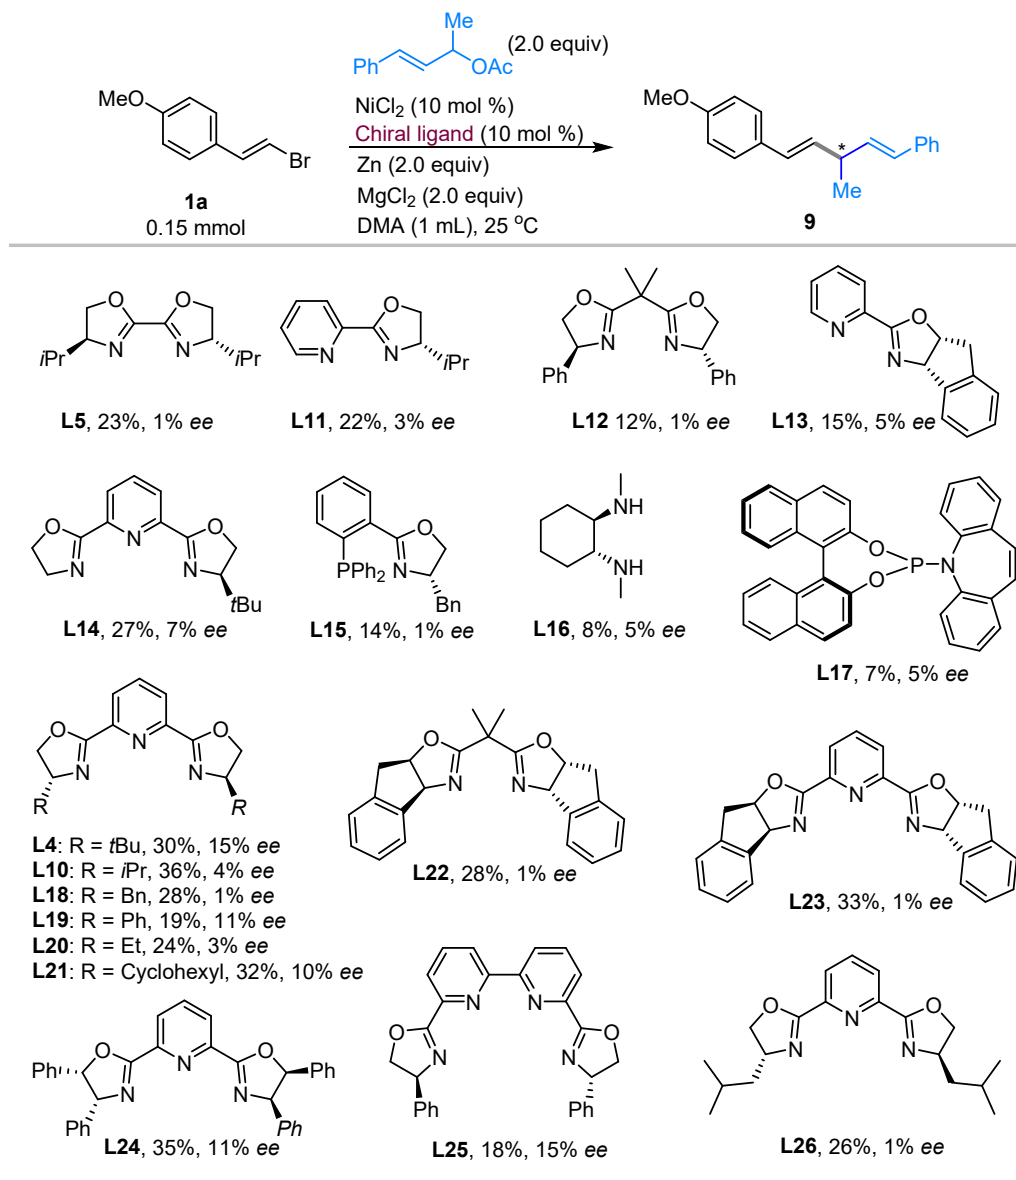

<sup>a</sup>NMR yield using 2,5-dimethyl furan as the internal standard from a mixture containing other impurities after a quick flash column chromatography. <sup>b</sup>The *ee* values were determined by HPLC on a chiral stationary phase.

**Table S5.** Screening the temperature for the Ni-catalyzed enantioselective reaction of (*E*)-4-phenylbut-3-en-2-yl acetate with **1a**.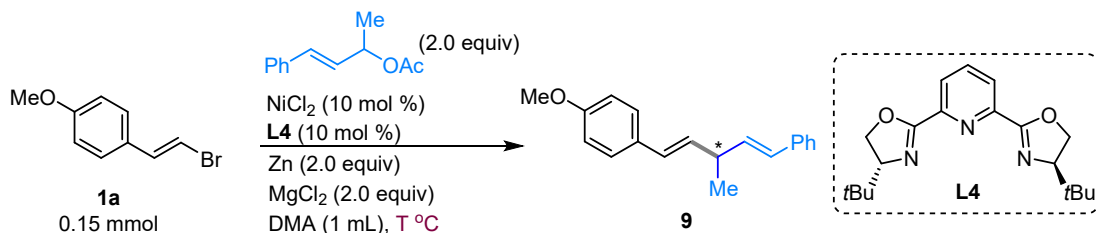

| entry | T °C  | yield% <sup>a</sup> | ee% <sup>b</sup> |
|-------|-------|---------------------|------------------|
| 1     | 40°C  | 37                  | 12               |
| 2     | 25°C  | 36                  | 15               |
| 3     | 0°C   | 43                  | 22               |
| 4     | -5°C  | 41                  | 24               |
| 5     | -10°C | 38                  | 20               |

<sup>a</sup>NMR yield using 2,5-dimethyl furan as the internal standard from a mixture containing other impurities after a quick flash column chromatography. <sup>b</sup>The *ee* values were determined by HPLC on a chiral stationary phase.

**Table S6.** Screening the variations for the reaction of **1a** with **1c**.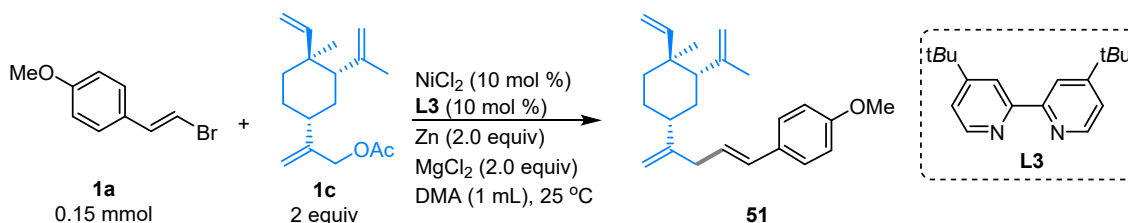

| entry | Variations                                | yield% <sup>a</sup> |
|-------|-------------------------------------------|---------------------|
| 1     | none ( <b>1a</b> : <b>1c</b> = 1.0 : 2.0) | 86                  |
| 2     | <b>1a</b> : <b>1c</b> = 1.0 : 1.0         | 40                  |
| 3     | <b>1a</b> : <b>1c</b> = 1.2 : 1.0         | 51                  |
| 4     | <b>1a</b> : <b>1c</b> = 1.5 : 1.0         | 78                  |
| 5     | <b>1a</b> : <b>1c</b> = 2.0 : 1.0         | 80                  |

<sup>a</sup>Isolated yield.

**Scheme S1.** Ni-catalyzed enantiospecific cross-electrophile vinylation of allylic acetates with **1a**.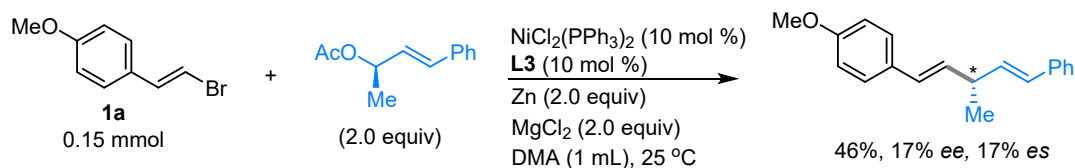

## 2. Ineffective Substrates:

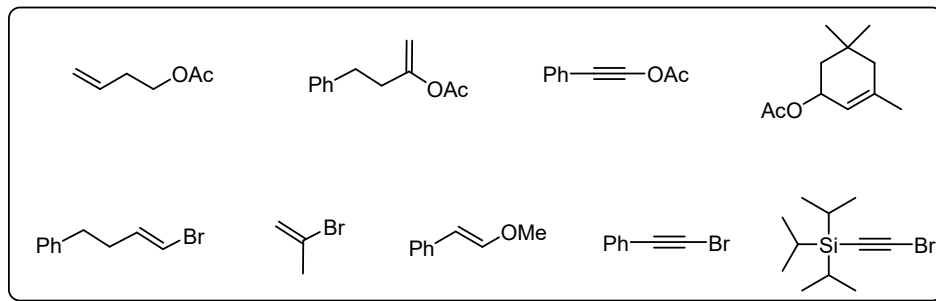

## III. Cross-Coupling of Allylic Acetates with Vinyl Bromides

### 1. General Procedure

To an oven-dried 8 mL screw-cap vial equipped with a magnetic stir bar was charged with alkenyl bromide (0.150 mmol, 1.0 equiv, if solid), allylic acetate (0.300 mmol, 2.0 equiv, if solid),  $\text{NiCl}_2(\text{PPh}_3)_2$  (9.8 mg, 0.015 mmol, 10 mol %), Zn (19.6 mg, 0.300 mmol, 2.0 equiv). The vial was introduced into a glove box, to which 4,4'-di-*tert*-butyl-2,2'-bipyridine (**L3**, 4.0 mg, 0.015 mmol, 10 mol %) and  $\text{MgCl}_2$  (28.6 mg, 0.300 mmol, 2.0 equiv) was added. The tube was sealed with a teflon-lined screw cap, removed from the glove box. Alkenyl bromide (0.150 mmol, 1.0 equiv, if liquid), allylic acetate (0.300 mmol, 2.0 equiv, if liquid), and DMA (1.0 mL) were added via a syringe. The reaction mixture was allowed to stir at 25 °C for 12 h. After the reaction was complete, the reaction mixture was directly filtered through a short pad of silica gel (using ethyl acetate in petroleum ether) to give the product. All yields were an average of two runs.

### 2. Details of the Experimental Data

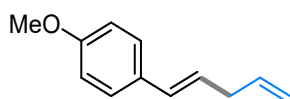

#### (*E*)-1-Methoxy-4-(penta-1,4-dien-1-yl)benzene (**1**).

The title compound was prepared following the general procedure using (*E*)-1-(2-bromovinyl)-4-methoxybenzene (32.0 mg, 0.150 mmol, 1.0 equiv), allyl acetate (30.0 mg, 0.300 mmol, 2.0 equiv). After purification by column chromatography (using 2% ethyl acetate in petroleum ether), the title compound was isolated in 85% yield (22.2 mg) as a colorless oil. The

spectral data were consistent with those which were reported in the literature<sup>2</sup> after comparison.

**<sup>1</sup>H NMR** (500 MHz, CDCl<sub>3</sub>):  $\delta$  7.29 (d,  $J$  = 8.7 Hz, 2H), 6.84 (d,  $J$  = 8.8 Hz, 2H), 6.35 (d,  $J$  = 15.8 Hz, 1H), 6.08 (dt,  $J$  = 15.8, 6.7 Hz, 1H), 5.90 (ddt,  $J$  = 16.6, 10.1, 6.4 Hz, 1H), 5.16–4.99 (m, 2H), 3.80 (s, 3H), 2.94 (ddd,  $J$  = 6.5, 2.9, 1.4 Hz, 2H).

**<sup>13</sup>C NMR** (126 MHz, CDCl<sub>3</sub>):  $\delta$  158.9, 136.9, 130.6, 130.3, 127.3, 126.1, 115.6, 114.1, 55.4, 37.1.

**HRMS** (ESI)  $m/z$  ([M-H]<sup>-</sup>) calcd for C<sub>12</sub>H<sub>13</sub>O: 173.0972. Found: 173.0990.

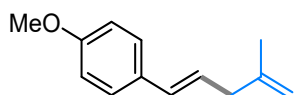

**(E)-1-Methoxy-4-(4-methylpenta-1,4-dien-1-yl)benzene (2).**

The title compound was prepared following the general procedure using (*E*)-1-(2-bromovinyl)-4-methoxybenzene (32.0 mg, 0.150 mmol, 1.0 equiv), 2-methylallyl acetate (34.2 mg, 0.300 mmol, 2.0 equiv). After purification by column chromatography (using 2% ethyl acetate in petroleum ether), the title compound was isolated in 81% yield (22.8 mg) as a colorless oil. The spectral data were consistent with those which were reported in the literature<sup>2</sup> after comparison.

**<sup>1</sup>H NMR** (500 MHz, CDCl<sub>3</sub>):  $\delta$  7.28 (d,  $J$  = 8.7 Hz, 2H), 6.88–6.79 (m, 2H), 6.33 (d,  $J$  = 15.8 Hz, 1H), 6.07 (dt,  $J$  = 15.8, 6.7 Hz, 1H), 5.52 (dt,  $J$  = 4.6, 3.8 Hz, 2H), 3.80 (s, 3H), 2.87 (ddd,  $J$  = 6.4, 3.5, 1.5 Hz, 2H), 1.72–1.66 (m, 3H).

**<sup>13</sup>C NMR** (126 MHz, CDCl<sub>3</sub>):  $\delta$  158.8, 132.3, 130.7, 129.7, 129.3, 127.2, 126.2, 114.0, 55.4, 36.1, 18.1.

**HRMS** (ESI)  $m/z$  ([M-H]<sup>-</sup>) calcd for C<sub>13</sub>H<sub>15</sub>O: 187.1128. Found: 187.1120.

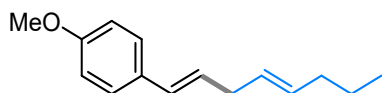

**1-Methoxy-4-((1E,4E)-octa-1,4-dien-1-yl)benzene (3).**

The title compound was prepared following the general procedure using (*E*)-1-(2-bromovinyl)-4-methoxybenzene (32.0 mg, 0.150 mmol, 1.0 equiv), (*E*)-hex-2-en-1-yl acetate (42.6 mg, 0.300 mmol, 2.0 equiv). After purification by column chromatography (using 2% ethyl acetate in petroleum ether), the title compound was isolated in 68% yield (22.1 mg) as a yellow oil. The spectral data were consistent with those which were reported in the literature<sup>3</sup> after comparison.

**<sup>1</sup>H NMR** (500 MHz, CDCl<sub>3</sub>):  $\delta$  7.29 (d,  $J$  = 8.7 Hz, 2H), 6.84 (d,  $J$  = 8.7 Hz, 2H), 6.33 (d,  $J$  = 15.8 Hz, 1H), 6.08 (dt,  $J$  = 15.8, 6.6 Hz, 1H), 5.49 (dt,  $J$  = 5.1, 3.6 Hz, 2H), 3.80 (s, 3H), 2.94–2.82 (m, 2H), 2.03–1.97 (m, 2H), 1.42–1.38 (m, 2H), 0.92 (d,  $J$  = 7.3 Hz, 3H).



**<sup>13</sup>C NMR** (126 MHz, CDCl<sub>3</sub>):  $\delta$  158.8, 131.7, 130.8, 129.7, 128.2, 127.3, 127.2, 114.0, 55.4, 36.1, 34.9, 29.8, 22.8.

**HRMS** (ESI)  $m/z$  ([M-H]<sup>-</sup>) calcd for C<sub>15</sub>H<sub>19</sub>O: 215.1441. Found: 215.1445.

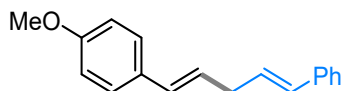

**1-Methoxy-4-((1E,4E)-5-phenylpenta-1,4-dien-1-yl)benzene (4).**

The title compound was prepared following the general procedure using (*E*)-1-(2-bromovinyl)-4-methoxybenzene (32.0 mg, 0.150 mmol, 1.0 equiv), cinnamyl acetate (52.8 mg, 0.300 mmol, 2.0 equiv). After purification by column chromatography (using 2% ethyl acetate in petroleum ether), the title compound was isolated in 85% yield (31.8 mg) as a colorless oil. This compound was also prepared according to the general procedure using (*E*)-1-(2-bromovinyl)-4-methoxybenzene (32.0 mg, 0.150 mmol, 1.0 equiv), 1-phenylallyl acetate (52.8 mg, 0.300 mmol, 2.0 equiv). After purification by column chromatography (using 2% ethyl acetate in petroleum ether), the title compound was isolated in 72% yield (27.0 mg) as a colorless oil. The spectral data were consistent with those which were reported in the literature<sup>4</sup> after comparison.

**<sup>1</sup>H NMR** (500 MHz, CDCl<sub>3</sub>):  $\delta$  7.40 (d,  $J$  = 7.3 Hz, 2H), 7.33 (dd,  $J$  = 8.1, 5.5 Hz, 4H), 7.23 (t,  $J$  = 7.2 Hz, 1H), 6.87 (d,  $J$  = 8.7 Hz, 2H), 6.53–6.38 (m, 2H), 6.32 (dt,  $J$  = 15.8, 6.6 Hz, 1H), 6.17 (dt,  $J$  = 15.8, 6.6 Hz, 1H), 3.82 (s, 3H), 3.13 (t,  $J$  = 6.6 Hz, 2H).

**<sup>13</sup>C NMR** (126 MHz, CDCl<sub>3</sub>):  $\delta$  158.9, 137.7, 130.9, 130.54, 130.53, 128.7, 128.6, 127.3, 127.2, 126.2, 126.1, 114.1, 55.4, 36.3.

**HRMS** (ESI)  $m/z$  ([M-H]<sup>-</sup>) calcd for C<sub>18</sub>H<sub>17</sub>O: 249.1285. Found: 249.1284.

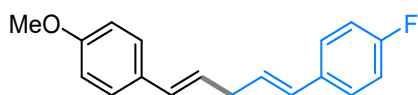

**1-Fluoro-4-((1E,4E)-5-(4-methoxyphenyl)penta-1,4-dien-1-yl)benzene (5).**

The title compound was prepared following the general procedure using (*E*)-1-(2-bromovinyl)-4-methoxybenzene (32.0 mg, 0.150 mmol, 1.0 equiv), (*E*)-3-(4-fluorophenyl)allyl acetate (58.2 mg, 0.300 mmol, 2.0 equiv). After purification by column chromatography (using 2% ethyl acetate in petroleum ether), the title compound was isolated in 70% yield (26.8 mg) as a colorless oil.

**<sup>1</sup>H NMR** (500 MHz, CDCl<sub>3</sub>):  $\delta$  7.54 (dd,  $J$  = 7.8, 1.6 Hz, 1H), 7.34 (d,  $J$  = 7.9 Hz, 1H), 7.32 (d,  $J$  = 8.7 Hz, 2H), 7.21 (t,  $J$  = 7.1 Hz, 1H), 7.15 (t,  $J$  = 8.4 Hz, 1H), 6.85 (dd,  $J$  = 8.0, 6.1 Hz, 3H), 6.43 (d,  $J$  = 15.8

Hz, 1H), 6.27 (dt,  $J = 15.8, 6.8$  Hz, 1H), 6.16 (dt,  $J = 15.8, 6.7$  Hz, 1H), 3.81 (s, 3H), 3.15 (t,  $J = 6.7$  Hz, 2H).

**$^{13}\text{C}$  NMR** (126 MHz,  $\text{CDCl}_3$ ):  $\delta$  163.1, 161.1, 159.0, 133.9 (d,  $J = 3.3$  Hz), 130.5 (d,  $J = 18.6$  Hz), 129.8, 128.4 (d,  $J = 2.2$  Hz), 127.6 (d,  $J = 7.9$  Hz), 127.3, 125.9, 115.5 (d,  $J = 21.4$  Hz), 114.1, 55.4, 36.2.

**HRMS** (ESI)  $m/z$  ( $[\text{M}-\text{H}]^-$ ) calcd for  $\text{C}_{18}\text{H}_{16}\text{FO}$ : 267.1190. Found: 267.1193.

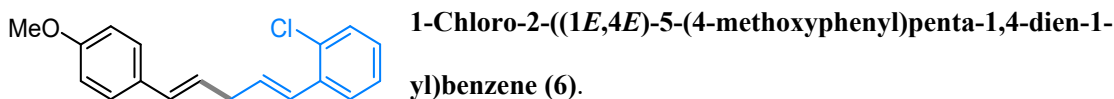

The title compound was prepared following the general procedure using (*E*)-1-(2-bromovinyl)-4-methoxybenzene (32.0 mg, 0.150 mmol, 1.0 equiv), (*E*)-3-(2-chlorophenyl)allyl acetate (63.0 mg, 0.300 mmol, 2.0 equiv). After purification by column chromatography (using 2% ethyl acetate in petroleum ether), the title compound was isolated in 61% yield (26.0 mg) as a colorless oil.

**$^1\text{H}$  NMR** (500 MHz,  $\text{CDCl}_3$ ):  $\delta$  7.33 (ddd,  $J = 6.8, 5.8, 3.7$  Hz, 4H), 7.00 (t,  $J = 8.7$  Hz, 2H), 6.87 (d,  $J = 8.8$  Hz, 2H), 6.51–6.36 (m, 2H), 6.18 (ddt,  $J = 31.9, 15.8, 6.7$  Hz, 2H), 3.82 (s, 3H), 3.10 (t,  $J = 6.7$  Hz, 2H).

**$^{13}\text{C}$  NMR** (126 MHz,  $\text{CDCl}_3$ ):  $\delta$  159.0, 135.8, 132.8, 131.6, 130.8, 130.5, 129.7, 128.2, 127.3, 127.2, 126.9, 126.8, 125.8, 114.1, 55.4, 36.6.

**HRMS** (ESI)  $m/z$  ( $[\text{M}-\text{H}]^-$ ) calcd for  $\text{C}_{18}\text{H}_{16}\text{ClO}$ : 283.0895. Found: 283.0889.

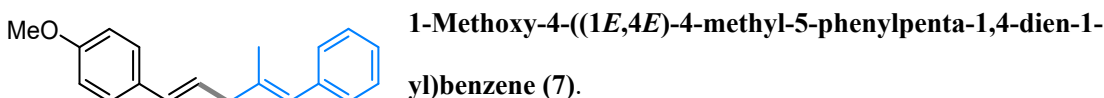

The title compound was prepared following the general procedure using (*E*)-1-(2-bromovinyl)-4-methoxybenzene (32.0 mg, 0.150 mmol, 1.0 equiv), (*E*)-2-methyl-3-phenylallyl acetate (57.0 mg, 0.300 mmol, 2.0 equiv). After purification by column chromatography (using 2% ethyl acetate in petroleum ether), the title compound was isolated in 73% yield (28.9 mg) as a colorless oil.

**$^1\text{H}$  NMR** (500 MHz,  $\text{CDCl}_3$ ):  $\delta$  7.32 (dd,  $J = 7.7, 5.3$  Hz, 4H), 7.29–7.24 (m, 2H), 7.19 (t,  $J = 7.2$  Hz, 1H), 6.86 (d,  $J = 8.6$  Hz, 2H), 6.42 (d,  $J = 15.7$  Hz, 1H), 6.35 (s, 1H), 6.22–6.09 (m, 1H), 3.81 (s, 3H), 3.04 (d,  $J = 7.0$  Hz, 2H), 1.90 (s, 3H).

**$^{13}\text{C}$  NMR** (126 MHz,  $\text{CDCl}_3$ ):  $\delta$  159.0, 138.6, 137.9, 131.2, 130.6, 128.9, 128.2, 127.3, 126.2, 126.1,

125.9, 114.1, 55.5, 44.2, 18.2.

**HRMS** (ESI)  $m/z$  ( $[M-H]^-$ ) calcd for  $C_{19}H_{19}O$ : 263.1441. Found: 263.1442.

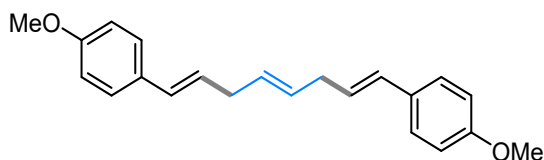

**(1E,4E,7E)-1,8-Bis(4-methoxyphenyl)octa-1,4,7-triene (8).**

The title compound was prepared following the general procedure using (*E*)-1-(2-bromovinyl)-4-methoxybenzene (64.0 mg, 0.300 mmol, 2.0 equiv), (*E*)-but-2-ene-1,4-diyl diacetate (25.8 mg, 0.150 mmol, 1.0 equiv). After purification by column chromatography (using 2% ethyl acetate in petroleum ether), the title compound was isolated in 53% yield (25.5 mg) as a yellow oil.

**<sup>1</sup>H NMR** (500 MHz,  $CDCl_3$ ):  $\delta$  7.29 (d,  $J$  = 8.6 Hz, 4H), 6.84 (d,  $J$  = 8.7 Hz, 4H), 6.35 (d,  $J$  = 15.8 Hz, 2H), 6.08 (dt,  $J$  = 15.7, 6.7 Hz, 2H), 5.58 (t,  $J$  = 3.4 Hz, 2H), 3.80 (s, 6H), 2.98–2.85 (m, 4H).

**<sup>13</sup>C NMR** (126 MHz,  $CDCl_3$ ):  $\delta$  158.9, 132.1, 129.9, 129.5, 127.3, 126.9, 114.0, 55.4, 36.1.

**HRMS** (ESI)  $m/z$  ( $[M-H]^-$ ) calcd for  $C_{22}H_{23}O_2$ : 319.1703. Found: 319.1699.

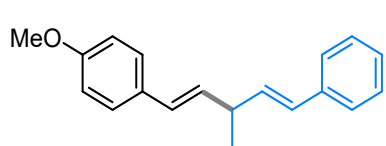

**1-Methoxy-4-((*R*,1*E*,4*E*)-3-methyl-5-phenylpenta-1,4-dien-1-yl)benzene (9).**

The title compound was prepared following the general procedure using (*E*)-1-(2-bromovinyl)-4-methoxybenzene (32.0 mg, 0.150 mmol, 1.0 equiv), (*E*)-4-phenylbut-3-en-2-yl acetate (57.0 mg, 0.300 mmol, 2.0 equiv). After purification by column chromatography (using 2% ethyl acetate in petroleum ether), the title compound was isolated in 62% yield (24.6 mg) as a colorless oil. The spectral data were consistent with those which were reported in the literature<sup>5</sup> after comparison.

This compound was also prepared according to the general procedure using 2,6-bis((*R*)-4-(tert-butyl)-4,5-dihydrooxazol-2-yl)pyridine (**L4**) as the ligand. After purification by column chromatography (using 2% ethyl acetate in petroleum ether), the title compound was isolated in 41% yield (16.2 mg, 24% *ee*) as a colorless oil.

**<sup>1</sup>H NMR** (500 MHz,  $CDCl_3$ ):  $\delta$  7.39 (d,  $J$  = 7.3 Hz, 2H), 7.32 (t,  $J$  = 8.4 Hz, 4H), 7.22 (t,  $J$  = 7.3 Hz, 1H), 6.87 (d,  $J$  = 8.7 Hz, 2H), 6.44 (d,  $J$  = 16.0 Hz, 1H), 6.39 (d,  $J$  = 15.9 Hz, 1H), 6.26 (dd,  $J$  = 15.9, 6.9

Hz, 1H), 6.12 (dd,  $J = 15.9, 6.9$  Hz, 1H), 3.82 (s, 3H), 3.21 (h,  $J = 6.8$  Hz, 1H), 1.31 (d,  $J = 6.9$  Hz, 3H).

**$^{13}\text{C}$  NMR** (126 MHz,  $\text{CDCl}_3$ ):  $\delta$  158.9, 137.8, 134.7, 132.2, 130.6, 128.8, 128.6, 128.3, 127.3, 127.1, 126.2, 114.1, 55.4, 40.1, 20.5.

**HRMS** (ESI)  $m/z$  ( $[\text{M}-\text{H}]^-$ ) calcd for  $\text{C}_{19}\text{H}_{19}\text{O}$ : 263.1441. Found: 263.1442.

**HPLC analysis**: CHIRALCEL OD-H column, 0.5% *i*PrOH in hexane, 0.5 mL/min, 254 nm UV detector,  $t_R$  (major) = 12.7 min,  $t_R$  (minor) = 14.5 min.

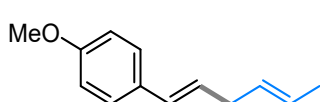

**1-((1E,4E)-Hexa-1,4-dien-1-yl)-4-methoxybenzene (11).**

The title compound was prepared following the general procedure using (*E*)-1-(2-bromovinyl)-4-methoxybenzene (32.0 mg, 0.150 mmol, 1.0 equiv), but-3-en-2-yl acetate (34.2 mg, 0.300 mmol, 2.0 equiv). After purification by column chromatography (using 2% ethyl acetate in petroleum ether), the title compound was isolated in 86% yield (24.3 mg) as a colorless oil.

**$^1\text{H}$  NMR** (500 MHz,  $\text{CDCl}_3$ ):  $\delta$  7.28 (d,  $J = 8.7$  Hz, 2H), 6.88–6.79 (m, 2H), 6.33 (d,  $J = 15.8$  Hz, 1H), 6.07 (dt,  $J = 15.8, 6.7$  Hz, 1H), 5.52 (dt,  $J = 4.6, 3.8$  Hz, 2H), 3.80 (s, 3H), 2.87 (ddd,  $J = 6.4, 3.5, 1.5$  Hz, 2H), 1.72–1.66 (m, 3H).

**$^{13}\text{C}$  NMR** (126 MHz,  $\text{CDCl}_3$ ):  $\delta$  158.8, 132.3, 130.7, 129.7, 129.3, 127.2, 126.2, 114.0, 55.4, 36.1, 18.1.

**HRMS** (ESI)  $m/z$  ( $[\text{M}-\text{H}]^-$ ) calcd for  $\text{C}_{13}\text{H}_{15}\text{O}$ : 187.1128. Found: 187.1127.

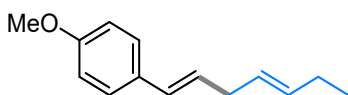

**1-((1E,4E)-Hepta-1,4-dien-1-yl)-4-methoxybenzene (12).**

The title compound was prepared following the general procedure using (*E*)-1-(2-bromovinyl)-4-methoxybenzene (32.0 mg, 0.150 mmol, 1.0 equiv), pent-1-en-3-yl acetate (38.4 mg, 0.300 mmol, 2.0 equiv). After purification by column chromatography (using 2% ethyl acetate in petroleum ether), the title compound was isolated in 74% yield (22.4 mg) as a pale colorless oil.

**$^1\text{H}$  NMR** (500 MHz,  $\text{CDCl}_3$ ):  $\delta$  7.29 (d,  $J = 8.7$  Hz, 2H), 6.84 (d,  $J = 8.7$  Hz, 2H), 6.34 (d,  $J = 15.8$  Hz, 1H), 6.08 (dt,  $J = 15.8, 6.7$  Hz, 1H), 5.58–5.44 (m, 2H), 3.80 (s, 3H), 2.88 (t,  $J = 6.2$  Hz, 2H), 2.10–1.99 (m, 2H), 1.00 (t,  $J = 7.5$  Hz, 3H).

**$^{13}\text{C}$  NMR** (126 MHz,  $\text{CDCl}_3$ ):  $\delta$  158.8, 133.4, 130.8, 129.7, 127.3, 127.2, 127.1, 114.0, 55.4, 36.0, 29.8,

25.7.

**HRMS** (ESI)  $m/z$  ( $[M+H]^+$ ) calcd for  $C_{14}H_{19}O$ : 203.1430. Found: 203.1436.

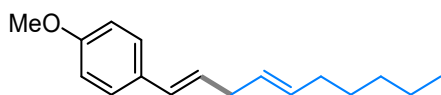

**1-((1E,4E)-Deca-1,4-dien-1-yl)-4-methoxybenzene (13).**

The title compound was prepared following the general procedure using (*E*)-1-(2-bromovinyl)-4-methoxybenzene (32.0 mg, 0.150 mmol, 1.0 equiv), oct-1-en-3-yl acetate (51.0 mg, 0.300 mmol, 2.0 equiv). After purification by column chromatography (using 2% ethyl acetate in petroleum ether), the title compound was isolated in 71% yield (26.0 mg) as a colorless oil.

**$^1H$  NMR** (500 MHz,  $CDCl_3$ ):  $\delta$  7.29 (d,  $J = 8.7$  Hz, 2H), 6.84 (d,  $J = 8.7$  Hz, 2H), 6.34 (d,  $J = 15.8$  Hz, 1H), 6.13–6.03 (m, 1H), 5.56–5.43 (m, 2H), 3.80 (s, 3H), 2.88 (t,  $J = 5.4$  Hz, 2H), 2.06–1.99 (m, 2H), 1.40–1.36 (m, 2H), 1.32–1.29 (m, 4H), 0.89 (t,  $J = 6.8$  Hz, 3H).

**$^{13}C$  NMR** (126 MHz,  $CDCl_3$ ):  $\delta$  158.7, 131.9, 130.7, 129.5, 127.8, 127.2, 127.1, 113.9, 55.3, 35.9, 32.6, 31.5, 29.2, 22.6, 14.1.

**HRMS** (ESI)  $m/z$  ( $[M-H]^-$ ) calcd for  $C_{17}H_{23}O$ : 243.1754. Found: 243.1751.

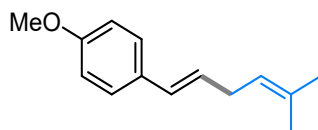

**(E)-1-Methoxy-4-(5-methylhexa-1,4-dien-1-yl)benzene (14).**

The title compound was prepared following the general procedure using (*E*)-1-(2-bromovinyl)-4-methoxybenzene (32.0 mg, 0.150 mmol, 1.0 equiv), 2-methylbut-3-en-2-yl acetate (38.4 mg, 0.300 mmol, 2.0 equiv). After purification by column chromatography (using 2% ethyl acetate in petroleum ether), the title compound was isolated in 64% yield (19.4 mg) as a colorless oil. The spectral data were consistent with those which were reported in the literature<sup>3</sup> after comparison.

**$^1H$  NMR** (500 MHz,  $CDCl_3$ ):  $\delta$  7.27 (d,  $J = 8.8$  Hz, 2H), 6.83 (d,  $J = 8.7$  Hz, 2H), 6.32 (d,  $J = 15.8$  Hz, 1H), 6.04 (dt,  $J = 15.8, 6.5$  Hz, 1H), 5.21 (t,  $J = 7.2$  Hz, 1H), 3.80 (s, 3H), 2.87 (t,  $J = 6.8$  Hz, 2H), 1.74 (s, 3H), 1.66 (s, 3H).

**$^{13}C$  NMR** (126 MHz,  $CDCl_3$ ):  $\delta$  157.6, 131.0, 129.7, 127.9, 126.3, 126.0, 120.9, 112.9, 54.2, 30.6, 24.7, 16.7.

**HRMS** (ESI)  $m/z$  ( $[M-H]^-$ ) calcd for  $C_{14}H_{17}O$ : 201.1285. Found: 201.1284.

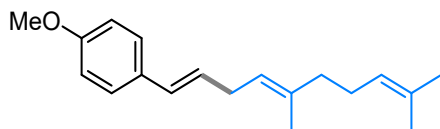

**1-((1E,4E)-5,9-Dimethyldeca-1,4,8-trien-1-yl)-4-methoxybenzene (15).**

The title compound was prepared following the general procedure using (*E*)-1-(2-bromovinyl)-4-methoxybenzene (32.0 mg, 0.150 mmol, 1.0 equiv), 3,7-dimethylocta-1,6-dien-3-yl acetate (58.8 mg, 0.300 mmol, 2.0 equiv). After purification by column chromatography (using 2% ethyl acetate in petroleum ether), the title compound was isolated in 52% yield (21.1 mg) as a colorless oil. The spectral data were consistent with those which were reported in the literature<sup>4</sup> after comparison.

**<sup>1</sup>H NMR** (500 MHz, CDCl<sub>3</sub>):  $\delta$  7.28 (d,  $J$  = 8.8 Hz, 2H), 6.84 (d,  $J$  = 8.7 Hz, 2H), 6.33 (d,  $J$  = 15.8 Hz, 1H), 6.05 (ddd,  $J$  = 14.4, 10.5, 6.6 Hz, 1H), 5.24 (t,  $J$  = 7.2 Hz, 1H), 5.14 (t,  $J$  = 7.0 Hz, 1H), 3.80 (s, 3H), 2.90 (t,  $J$  = 6.8 Hz, 2H), 2.17–2.02 (m, 4H), 1.69 (dd,  $J$  = 40.1, 23.1 Hz, 9H).

**<sup>13</sup>C NMR** (126 MHz, CDCl<sub>3</sub>):  $\delta$  158.8, 136.6, 131.6, 130.9, 129.0, 127.5, 127.2, 124.4, 121.8, 114.0, 55.4, 39.9, 31.6, 26.8, 25.9, 17.8, 16.2.

**HRMS** (ESI)  $m/z$  ([*M*-H]<sup>-</sup>) calcd for C<sub>19</sub>H<sub>25</sub>O: 269.1911. Found: 269.1915.

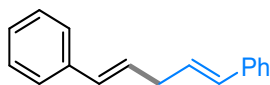

**(1E,4E)-1,5-Diphenylpenta-1,4-diene (16).**

The title compound was prepared following the general procedure using (*E*)-(2-bromovinyl)benzene (27.5 mg, 0.150 mmol, 1.0 equiv), cinnamyl acetate (52.8 mg, 0.300 mmol, 2.0 equiv). After purification by column chromatography (using 2% ethyl acetate in petroleum ether), the title compound was isolated in 73% yield (24.1 mg) as a colorless oil. The spectral data were consistent with those which were reported in the literature<sup>4</sup> after comparison.

**<sup>1</sup>H NMR** (500 MHz, CDCl<sub>3</sub>):  $\delta$  7.31–7.28 (m, 4H), 7.19 (ddd,  $J$  = 8.6, 5.7, 3.1 Hz, 1H), 6.55 (s, 2H), 6.37–6.26 (m, 2H), 3.84 (s, 6H), 3.82 (s, 3H), 3.78 (dd,  $J$  = 14.8, 8.5 Hz, 1H), 1.41–1.35 (m, 2H), 1.15 (s, 12H).

**<sup>13</sup>C NMR** (126 MHz, CDCl<sub>3</sub>):  $\delta$  137.8, 131.0, 130.5, 128.6, 127.3, 126.2, 36.3.

**HRMS** (ESI)  $m/z$  ([*M*-H]<sup>-</sup>) calcd for C<sub>17</sub>H<sub>15</sub>: 219.1179. Found: 219.1169.

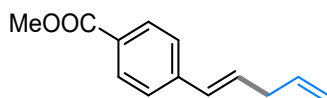

**Methyl (*E*)-4-(penta-1,4-dien-1-yl)benzoate (17).**

The title compound was prepared following the general procedure

using methyl (*E*)-4-(2-bromovinyl)benzoate (36.2 mg, 0.150 mmol, 1.0 equiv), allyl acetate (30.0 mg, 0.300 mmol, 2.0 equiv). After purification by column chromatography (using 2% ethyl acetate in petroleum ether), the title compound was isolated in 86% yield (26.1 mg) as a colorless oil.

**<sup>1</sup>H NMR** (500 MHz, CDCl<sub>3</sub>): δ 7.96 (d, *J* = 8.4 Hz, 2H), 7.39 (d, *J* = 8.4 Hz, 2H), 6.44 (d, *J* = 15.9 Hz, 1H), 6.35 (dt, *J* = 15.9, 6.4 Hz, 1H), 5.90 (ddt, *J* = 16.7, 10.1, 6.4 Hz, 1H), 5.15–5.05 (m, 2H), 3.89 (s, 3H), 2.98 (t, *J* = 6.4 Hz, 2H).

**<sup>13</sup>C NMR** (126 MHz, CDCl<sub>3</sub>): δ 167.0, 142.2, 135.9, 131.2, 130.1, 129.9, 128.6, 126.0, 116.2, 52.1, 37.1.

**HRMS** (ESI) *m/z* ([*M*+*H*]<sup>+</sup>) calcd for C<sub>13</sub>H<sub>15</sub>O<sub>2</sub>: 203.1067. Found: 203.1069.

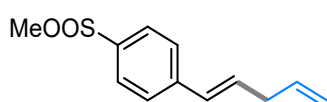

**(*E*)-1-(Methylsulfonyl)-4-(penta-1,4-dien-1-yl)benzene (18).**

The title compound was prepared following the general procedure using (*E*)-1-(2-bromovinyl)-4-(methylsulfonyl)benzene (39.2 mg, 0.150 mmol, 1.0 equiv), allyl acetate (30.0 mg, 0.300 mmol, 2.0 equiv). After purification by column chromatography (using 2% ethyl acetate in petroleum ether), the title compound was isolated in 70% yield (23.3 mg) as a colorless oil.

**<sup>1</sup>H NMR** (500 MHz, CDCl<sub>3</sub>): δ 7.85 (d, *J* = 8.4 Hz, 2H), 7.51 (d, *J* = 8.4 Hz, 2H), 6.51–6.36 (m, 2H), 5.89 (ddt, *J* = 16.7, 10.1, 6.4 Hz, 1H), 5.11 (ddd, *J* = 8.8, 6.1, 2.2 Hz, 2H), 3.04 (s, 3H), 3.00 (t, *J* = 5.9 Hz, 2H).

**<sup>13</sup>C NMR** (126 MHz, CDCl<sub>3</sub>): δ 143.2, 138.6, 135.6, 132.9, 129.4, 127.8, 126.8, 116.6, 44.7, 37.1.

**HRMS** (ESI) *m/z* ([*M*+*H*]<sup>+</sup>) calcd for C<sub>12</sub>H<sub>15</sub>O<sub>2</sub>S: 223.0787. Found: 223.0785.

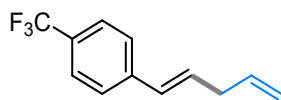

**(*E*)-1-(Penta-1,4-dien-1-yl)-4-(trifluoromethyl)benzene (19).**

The title compound was prepared following the general procedure using (*E*)-1-(2-bromovinyl)-4-(trifluoromethyl)benzene (37.7 mg, 0.150 mmol, 1.0 equiv), allyl acetate (30.0 mg, 0.300 mmol, 2.0 equiv). After purification by column chromatography (using 2% ethyl acetate in petroleum ether), the title compound was isolated in 76%

yield (24.2 mg) as a colorless oil. The spectral data were consistent with those which were reported in the literature<sup>2</sup> after comparison.

**<sup>1</sup>H NMR** (500 MHz, CDCl<sub>3</sub>):  $\delta$  7.54 (d,  $J$  = 8.2 Hz, 2H), 7.44 (d,  $J$  = 8.2 Hz, 2H), 6.44 (d,  $J$  = 15.9 Hz, 1H), 6.34 (dt,  $J$  = 15.9, 6.5 Hz, 1H), 5.90 (ddt,  $J$  = 16.7, 10.1, 6.4 Hz, 1H), 5.19–5.02 (m, 2H), 2.99 (t,  $J$  = 6.4 Hz, 2H).

**<sup>13</sup>C NMR** (126 MHz, CDCl<sub>3</sub>):  $\delta$  141.2, 136.0, 131.2, 129.8, 126.7, 126.4, 126.3, 125.6 (q,  $J$  = 3.8 Hz), 116.3, 37.1.

**HRMS** (ESI)  $m/z$  ([M-H]<sup>-</sup>) calcd for C<sub>12</sub>H<sub>10</sub>F<sub>3</sub>: 211.0740. Found: 211.1051.

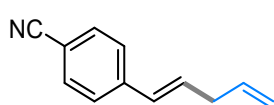

**(E)-4-(Penta-1,4-dien-1-yl)benzonitrile (20).**

The title compound was prepared following the general procedure using (*E*)-4-(2-bromovinyl)benzonitrile (31.2 mg, 0.150 mmol, 1.0 equiv), allyl acetate (30.0 mg, 0.300 mmol, 2.0 equiv). After purification by column chromatography (using 10% ethyl acetate in petroleum ether), the title compound was isolated in 73% yield (18.5 mg) as a white solid.

**<sup>1</sup>H NMR** (500 MHz, CDCl<sub>3</sub>):  $\delta$  7.75 (d,  $J$  = 8.3 Hz, 2H), 7.41 (d,  $J$  = 8.3 Hz, 2H), 6.37 (ddd,  $J$  = 27.9, 15.9, 11.2 Hz, 2H), 5.90 (ddt,  $J$  = 16.7, 10.1, 6.4 Hz, 1H), 5.22–5.01 (m, 2H), 2.99 (t,  $J$  = 6.4 Hz, 2H).

**<sup>13</sup>C NMR** (126 MHz, CDCl<sub>3</sub>):  $\delta$  141.5, 136.0, 131.6, 131.1, 130.0, 128.1, 127.8, 126.3, 116.3, 37.2.

**HRMS** (ESI)  $m/z$  ([M+H]<sup>+</sup>) calcd for C<sub>12</sub>H<sub>12</sub>N: 170.0964. Found: 170.0969.

**M.p.:** 75–76 °C.

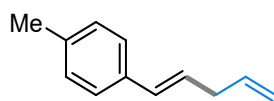

**(E)-1-Methyl-4-(penta-1,4-dien-1-yl)benzene (21).**

The title compound was prepared following the general procedure using (*E*)-1-(2-bromovinyl)-4-methylbenzene (29.5 mg, 0.150 mmol, 1.0 equiv), allyl acetate (30.0 mg, 0.300 mmol, 2.0 equiv). After purification by column chromatography (using 2% ethyl acetate in petroleum ether), the title compound was isolated in 80% yield (18.9 mg) as a colorless oil. The spectral data were consistent with those which were reported in the literature<sup>6</sup> after comparison.

**<sup>1</sup>H NMR** (500 MHz, CDCl<sub>3</sub>):  $\delta$  7.24 (d,  $J$  = 8.0 Hz, 2H), 7.10 (d,  $J$  = 7.9 Hz, 2H), 6.38 (d,  $J$  = 15.9 Hz, 1H), 6.17 (dt,  $J$  = 15.8, 6.7 Hz, 1H), 5.90 (ddt,  $J$  = 16.6, 10.1, 6.4 Hz, 1H), 5.15–4.99 (m, 2H), 2.95 (t,  $J$  = 6.5 Hz, 2H), 2.32 (s, 3H).



**<sup>13</sup>C NMR** (126 MHz, CDCl<sub>3</sub>): δ 136.9, 136.8, 135.0, 130.8, 129.3, 127.3, 126.1, 115.7, 37.2, 29.9.

**HRMS** (ESI) m/z ([M-H]<sup>-</sup>) calcd for C<sub>12</sub>H<sub>13</sub>: 157.1023. Found: 157.1012.

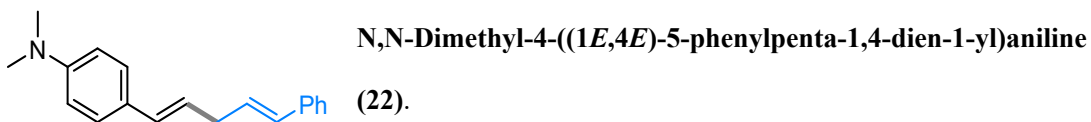

The title compound was prepared following the general procedure using (*E*)-4-(2-bromovinyl)-*N,N*-dimethylaniline (33.9 mg, 0.150 mmol, 1.0 equiv), cinnamyl acetate (52.8 mg, 0.300 mmol, 2.0 equiv). After purification by column chromatography (using 2% ethyl acetate in petroleum ether), the title compound was isolated in 67% yield (26.4 mg) as a yellow oil.

**<sup>1</sup>H NMR** (500 MHz, CDCl<sub>3</sub>): δ 7.35 (d, *J* = 7.5 Hz, 2H), 7.27 (dd, *J* = 16.6, 8.2 Hz, 4H), 7.18 (t, *J* = 7.4 Hz, 1H), 6.66 (d, *J* = 8.8 Hz, 2H), 6.44 (d, *J* = 15.8 Hz, 1H), 6.37 (d, *J* = 15.8 Hz, 1H), 6.28 (dt, *J* = 15.8, 6.6 Hz, 1H), 6.06 (dt, *J* = 15.8, 6.7 Hz, 1H), 3.07 (t, *J* = 6.6 Hz, 2H), 2.92 (s, 6H).

**<sup>13</sup>C NMR** (126 MHz, CDCl<sub>3</sub>): δ 149.9, 137.8, 131.0, 130.7, 129.1, 128.6, 127.2, 127.1, 126.4, 126.2, 123.9, 112.7, 40.7, 36.4.

**HRMS** (ESI) m/z ([M+H]<sup>+</sup>) calcd for C<sub>19</sub>H<sub>22</sub>N: 264.1747. Found: 264.1807.

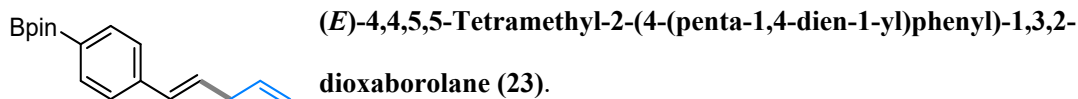

The title compound was prepared following the general procedure using (*E*)-2-(4-(2-bromovinyl)phenyl)-4,4,5,5-tetramethyl-1,3,2-dioxaborolane (46.4 mg, 0.150 mmol, 1.0 equiv), allyl acetate (30.0 mg, 0.300 mmol, 2.0 equiv). After purification by column chromatography (using 5% ethyl acetate in petroleum ether), the title compound was isolated in 70% yield (28.4 mg) as a yellow oil. The spectral data were consistent with those which were reported in the literature<sup>7</sup> after comparison.

**<sup>1</sup>H NMR** (500 MHz, CDCl<sub>3</sub>): δ 7.75 (d, *J* = 8.0 Hz, 2H), 7.36 (d, *J* = 8.0 Hz, 2H), 6.43 (d, *J* = 15.9 Hz, 1H), 6.31 (dt, *J* = 15.8, 6.6 Hz, 1H), 5.91 (ddt, *J* = 16.7, 10.1, 6.4 Hz, 1H), 5.10 (ddd, *J* = 13.6, 11.5, 1.5 Hz, 2H), 2.98 (t, *J* = 6.5 Hz, 2H), 1.35 (s, 12H).

**<sup>13</sup>C NMR** (126 MHz, CDCl<sub>3</sub>): δ 140.5, 136.4, 135.2, 131.0, 129.5, 125.7, 125.5, 116.0, 83.8, 37.2, 25.0.

**HRMS** (ESI) m/z ([M+H]<sup>+</sup>) calcd for C<sub>17</sub>H<sub>24</sub>BO<sub>2</sub>: 271.1864. Found: 271.1865.

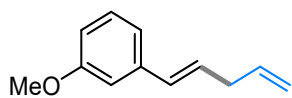

**(E)-1-Methoxy-3-(penta-1,4-dien-1-yl)benzene (24).**

The title compound was prepared following the general procedure using (*E*)-1-(2-bromovinyl)-3-methoxybenzene (32.0 mg, 0.150 mmol, 1.0 equiv), allyl acetate (30.0 mg, 0.300 mmol, 2.0 equiv). After purification by column chromatography (using 2% ethyl acetate in petroleum ether), the title compound was isolated in 83% yield (21.7 mg) as a colorless oil. The spectral data were consistent with those which were reported in the literature<sup>8</sup> after comparison.

**<sup>1</sup>H NMR** (500 MHz, CDCl<sub>3</sub>): δ 7.21 (t, *J* = 7.9 Hz, 1H), 6.95 (d, *J* = 7.6 Hz, 1H), 6.93–6.84 (m, 1H), 6.76 (dd, *J* = 8.0, 2.2 Hz, 1H), 6.38 (d, *J* = 15.8 Hz, 1H), 6.23 (dt, *J* = 15.8, 6.6 Hz, 1H), 5.96–5.84 (m, 1H), 5.15–5.02 (m, 2H), 3.81 (s, 3H), 2.96 (t, *J* = 6.5 Hz, 2H).

**<sup>13</sup>C NMR** (126 MHz, CDCl<sub>3</sub>): δ 159.9, 139.3, 136.6, 130.9, 129.6, 128.7, 118.9, 115.9, 112.8, 111.5, 55.3, 37.1.

**HRMS** (ESI) *m/z* ([*M*-H]<sup>-</sup>) calcd for C<sub>12</sub>H<sub>13</sub>O: 173.0972. Found: 173.0990.

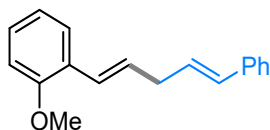

**(E)-1-Methoxy-2-(penta-1,4-dien-1-yl)benzene (25).**

The title compound was prepared following the general procedure using methyl (*E*)-1-(2-bromovinyl)-2-methoxybenzene (32.0 mg, 0.150 mmol, 1.0 equiv), cinnamyl acetate (52.8 mg, 0.300 mmol, 2.0 equiv). After purification by column chromatography (using 2% ethyl acetate in petroleum ether), the title compound was isolated in 79% yield (20.6 mg) as a colorless oil. The spectral data were consistent with those which were reported in the literature<sup>4</sup> after comparison.

**<sup>1</sup>H NMR** (500 MHz, CDCl<sub>3</sub>): δ 7.47 (dd, *J* = 7.6, 1.5 Hz, 1H), 7.40 (d, *J* = 7.3 Hz, 2H), 7.32 (t, *J* = 7.7 Hz, 2H), 7.23 (t, *J* = 7.5 Hz, 2H), 6.94 (t, *J* = 7.4 Hz, 1H), 6.89 (d, *J* = 8.2 Hz, 1H), 6.82 (d, *J* = 16.0 Hz, 1H), 6.50 (d, *J* = 15.8 Hz, 1H), 6.32 (ddt, *J* = 16.0, 11.2, 6.7 Hz, 2H), 3.87 (s, 3H), 3.17 (t, *J* = 6.7 Hz, 2H).

**<sup>13</sup>C NMR** (126 MHz, CDCl<sub>3</sub>): δ 156.5, 137.8, 130.9, 129.0, 128.7, 128.6, 128.2, 127.1, 126.77, 126.76, 126.2, 125.9, 120.8, 110.9, 55.6, 36.9.

**HRMS** (ESI) *m/z* ([*M*-H]<sup>-</sup>) calcd for C<sub>18</sub>H<sub>17</sub>O: 249.1285. Found: 249.1284.

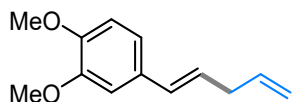

**(E)-1,2-Dimethoxy-4-(penta-1,4-dien-1-yl)benzene (26).**

The title compound was prepared following the general procedure using

(*E*)-4-(2-bromovinyl)-1,2-dimethoxybenzene (36.5 mg, 0.150 mmol, 1.0 equiv), allyl acetate (30.0 mg, 0.300 mmol, 2.0 equiv). After purification by column chromatography (using 5% ethyl acetate in petroleum ether), the title compound was isolated in 73% yield (22.3 mg) as a colorless oil.

**<sup>1</sup>H NMR** (500 MHz, CDCl<sub>3</sub>): δ 6.92 (d, *J* = 1.9 Hz, 1H), 6.88 (dd, *J* = 8.2, 1.9 Hz, 1H), 6.80 (d, *J* = 8.2 Hz, 1H), 6.35 (d, *J* = 15.8 Hz, 1H), 6.09 (dt, *J* = 15.8, 6.7 Hz, 1H), 5.91 (ddt, *J* = 16.6, 10.1, 6.4 Hz, 1H), 5.20–5.01 (m, 2H), 3.89 (s, 3H), 3.87 (s, 3H), 2.95 (t, *J* = 6.6 Hz, 2H).

**<sup>13</sup>C NMR** (126 MHz, CDCl<sub>3</sub>): δ 149.1, 148.5, 136.8, 130.9, 130.6, 126.4, 119.1, 115.7, 111.3, 108.7, 56.0, 55.9, 37.1.

**HRMS** (ESI) *m/z* ([*M*+*H*]<sup>+</sup>) calcd for C<sub>13</sub>H<sub>17</sub>O<sub>2</sub>: 205.1223. Found: 205.1227.

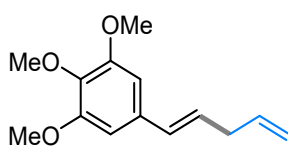

**(*E*)-1,2,3-Trimethoxy-5-(penta-1,4-dien-1-yl)benzene (27).**

The title compound was prepared following the general procedure using (*E*)-5-(2-iodovinyl)-1,2,3-trimethoxybenzene (48.0 mg, 0.150 mmol, 1.0 equiv), allyl acetate (30.0 mg, 0.300 mmol, 2.0 equiv). After purification by column chromatography (using 5% ethyl acetate in petroleum ether), the title compound was isolated in 78% yield (27.4 mg) as a yellow oil. The spectral data were consistent with those which were reported in the literature<sup>9</sup> after comparison.

**<sup>1</sup>H NMR** (500 MHz, CDCl<sub>3</sub>): δ 6.58 (s, 2H), 6.34 (d, *J* = 15.8 Hz, 1H), 6.14 (dt, *J* = 15.7, 6.7 Hz, 1H), 5.90 (ddt, *J* = 16.6, 10.1, 6.4 Hz, 1H), 5.21–4.98 (m, 2H), 3.87 (s, 6H), 3.83 (s, 3H), 2.96 (t, *J* = 6.5 Hz, 2H).

**<sup>13</sup>C NMR** (126 MHz, CDCl<sub>3</sub>): δ 153.4, 137.5, 136.5, 133.5, 130.9, 127.9, 115.9, 103.2, 61.0, 56.2, 37.0.

**HRMS** (ESI) *m/z* ([*M*+*H*]<sup>+</sup>) calcd for C<sub>14</sub>H<sub>19</sub>O<sub>3</sub>: 235.1329. Found: 235.1332.

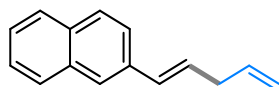

**(*E*)-2-(Penta-1,4-dien-1-yl)naphthalene (28).**

The title compound was prepared following the general procedure using (*E*)-2-(2-bromovinyl)naphthalene (34.9 mg, 0.150 mmol, 1.0 equiv), allyl acetate (30.0 mg, 0.300 mmol, 2.0 equiv). After purification by column chromatography (using 2% ethyl acetate in petroleum ether), the title compound was isolated in 85% yield (24.7 mg) as a yellow oil. The spectral data were consistent with those which were reported in the literature<sup>10</sup> after comparison.

**<sup>1</sup>H NMR** (500 MHz, CDCl<sub>3</sub>): δ 7.79 (t, *J* = 9.0 Hz, 3H), 7.70 (s, 1H), 7.60 (dd, *J* = 8.5, 1.7 Hz, 1H),

7.44 (tdd,  $J = 8.1, 6.9, 1.4$  Hz, 2H), 6.59 (d,  $J = 15.9$  Hz, 1H), 6.38 (dt,  $J = 15.8, 6.7$  Hz, 1H), 5.96 (ddt,  $J = 16.6, 10.1, 6.4$  Hz, 1H), 5.20–5.08 (m, 2H), 3.04 (t,  $J = 5.8$  Hz, 2H).

**$^{13}\text{C NMR}$**  (126 MHz,  $\text{CDCl}_3$ ):  $\delta$  136.6, 135.2, 133.8, 132.9, 131.1, 128.8, 128.2, 128.0, 127.8, 126.3, 125.73, 125.69, 123.7, 115.9, 37.3.

**HRMS** (ESI)  $m/z$  ( $[\text{M}-\text{H}]^-$ ) calcd for  $\text{C}_{15}\text{H}_{13}$ : 193.1023. Found: 193.1016.

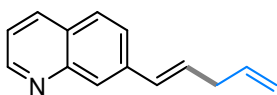

**(E)-7-(Penta-1,4-dien-1-yl)quinoline (29).**

The title compound was prepared following the general procedure using (*E*)-7-(2-bromovinyl)quinoline (35.1 mg, 0.150 mmol, 1.0 equiv), allyl acetate (30.0 mg, 0.300 mmol, 2.0 equiv). After purification by column chromatography (using 5% ethyl acetate in petroleum ether), the title compound was isolated in 73% yield (21.3 mg) as a yellow oil.

**$^1\text{H NMR}$**  (500 MHz,  $\text{CDCl}_3$ ):  $\delta$  8.95 (dd,  $J = 4.1, 1.7$  Hz, 1H), 8.13 (dd,  $J = 8.3, 1.7$  Hz, 1H), 7.88 (d,  $J = 7.0$  Hz, 1H), 7.77–7.67 (m, 2H), 7.51 (t,  $J = 7.7$  Hz, 1H), 7.40 (dd,  $J = 8.2, 4.2$  Hz, 1H), 6.46 (dt,  $J = 16.0, 6.8$  Hz, 1H), 6.00 (ddt,  $J = 16.7, 10.1, 6.4$  Hz, 1H), 5.13 (ddd,  $J = 13.6, 11.6, 1.6$  Hz, 2H), 3.14 (td,  $J = 6.7, 1.4$  Hz, 2H).

**$^{13}\text{C NMR}$**  (126 MHz,  $\text{CDCl}_3$ ):  $\delta$  149.6, 145.8, 136.9, 136.5, 136.4, 130.8, 128.6, 127.0, 126.9, 126.6, 125.6, 121.2, 115.8, 37.8.

**HRMS** (ESI)  $m/z$  ( $[\text{M}+\text{H}]^+$ ) calcd for  $\text{C}_{14}\text{H}_{14}\text{N}$ : 196.1121. Found: 196.1201.

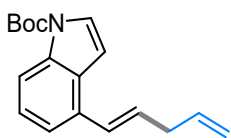

**tert-Butyl (E)-4-(penta-1,4-dien-1-yl)-1H-indole-1-carboxylate (30).**

The title compound was prepared following the general procedure using *tert*-butyl (*E*)-4-(2-bromovinyl)-1H-indole-1-carboxylate (48.3 mg, 0.150 mmol, 1.0 equiv), allyl acetate (30.0 mg, 0.300 mmol, 2.0 equiv). After purification by column chromatography (using 5% ethyl acetate in petroleum ether), the title compound was isolated in 79% yield (33.5 mg) as a colorless oil.

**$^1\text{H NMR}$**  (500 MHz,  $\text{CDCl}_3$ ):  $\delta$  8.05 (d,  $J = 7.8$  Hz, 1H), 7.62 (d,  $J = 3.6$  Hz, 1H), 7.34 (d,  $J = 7.5$  Hz, 1H), 7.30–7.24 (m, 1H), 6.84–6.68 (m, 2H), 6.36 (dt,  $J = 15.8, 6.7$  Hz, 1H), 5.97 (ddt,  $J = 16.6, 10.1, 6.4$

Hz, 1H), 5.23–5.03 (m, 2H), 3.06 (td,  $J = 6.6, 1.2$  Hz, 2H), 1.69 (s, 9H).

**$^{13}\text{C}$  NMR** (126 MHz,  $\text{CDCl}_3$ ):  $\delta$  149.9, 136.6, 135.6, 130.4, 129.8, 128.7, 128.1, 125.9, 124.5, 119.3, 115.9, 113.9, 105.6, 83.8, 37.5, 28.3.

**HRMS** (ESI)  $m/z$  ( $[\text{M}+\text{H}]^+$ ) calcd for  $\text{C}_{18}\text{H}_{22}\text{NO}_2$ : 284.1645. Found: 284.1646.

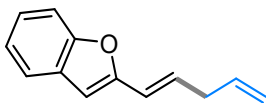

**(E)-2-(Penta-1,4-dien-1-yl)benzofuran (31).**

The title compound was prepared following the general procedure using (*E*)-2-(2-bromovinyl)benzofuran (33.5 mg, 0.150 mmol, 1.0 equiv), allyl acetate (30.0 mg, 0.300 mmol, 2.0 equiv). After purification by column chromatography (using 2% ethyl acetate in petroleum ether), the title compound was isolated in 76% yield (21.0 mg) as a yellow oil.

**$^1\text{H}$  NMR** (500 MHz,  $\text{CDCl}_3$ ):  $\delta$  7.49 (d,  $J = 7.4$  Hz, 1H), 7.41 (d,  $J = 8.0$  Hz, 1H), 7.24 (d,  $J = 6.8$  Hz, 1H), 7.20 (d,  $J = 9.6$  Hz, 1H), 6.54–6.44 (m, 2H), 6.39–6.31 (m, 1H), 6.00–5.84 (m, 1H), 5.12 (t,  $J = 14.4$  Hz, 2H), 3.00 (t,  $J = 6.3$  Hz, 2H).

**$^{13}\text{C}$  NMR** (126 MHz,  $\text{CDCl}_3$ ):  $\delta$  155.1, 154.8, 135.8, 131.0, 129.2, 124.3, 122.8, 120.8, 119.7, 116.4, 110.9, 103.3, 36.9.

**HRMS** (ESI)  $m/z$  ( $[\text{M}-\text{H}]^-$ ) calcd for  $\text{C}_{13}\text{H}_{13}\text{O}$ : 183.0815. Found: 183.0813.

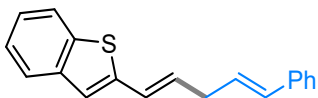

**2-((1E,4E)-5-Phenylpenta-1,4-dien-1-yl)benzo[*b*]thiophene (32).**

The title compound was prepared following the general procedure using (*E*)-2-(2-bromovinyl)benzo[*b*]thiophene (35.9 mg, 0.150 mmol, 1.0 equiv), cinnamyl acetate (52.8 mg, 0.300 mmol, 2.0 equiv). After purification by column chromatography (using 2% ethyl acetate in petroleum ether), the title compound was isolated in 77% yield (31.8 mg) as a yellow solid.

**$^1\text{H}$  NMR** (500 MHz,  $\text{CDCl}_3$ ):  $\delta$  7.73 (d,  $J = 7.5$  Hz, 1H), 7.65 (d,  $J = 7.2$  Hz, 1H), 7.38 (d,  $J = 7.5$  Hz, 2H), 7.30 (d,  $J = 7.8$  Hz, 2H), 7.29–7.25 (m, 2H), 7.24–7.20 (m, 1H), 7.07 (s, 1H), 6.67 (d,  $J = 15.6$  Hz, 1H), 6.48 (d,  $J = 15.8$  Hz, 1H), 6.25 (ddt,  $J = 22.3, 15.5, 6.6$  Hz, 2H), 3.13 (t,  $J = 6.6$  Hz, 2H).

**$^{13}\text{C}$  NMR** (126 MHz,  $\text{CDCl}_3$ ):  $\delta$  143.0, 140.3, 138.8, 137.5, 131.7, 131.1, 128.7, 127.5, 127.4, 126.3, 125.1, 124.52, 124.48, 123.4, 122.3, 121.9, 36.2.

**HRMS** (ESI)  $m/z$  ( $[\text{M}-\text{H}]^-$ ) calcd for  $\text{C}_{19}\text{H}_{15}\text{S}$ : 275.0900. Found: 275.0901.

**M.p.:** 81–82 °C.

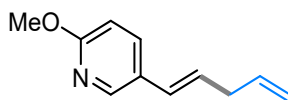

**(E)-5-(Penta-1,4-dien-1-yl)-2-methoxypyridine (33).**

The title compound was prepared following the general procedure using (*E*)-5-(2-bromovinyl)-2-methoxypyridine (32.1 mg, 0.150 mmol, 1.0 equiv), allyl acetate (30.0 mg, 0.300 mmol, 2.0 equiv). After purification by column chromatography (using 5% ethyl acetate in petroleum ether), the title compound was isolated in 69% yield (18.1 mg) as a colorless oil.

**<sup>1</sup>H NMR** (500 MHz, CDCl<sub>3</sub>): δ 8.07 (d, *J* = 2.3 Hz, 1H), 7.63 (dd, *J* = 8.6, 2.4 Hz, 1H), 6.69 (d, *J* = 8.6 Hz, 1H), 6.33 (d, *J* = 15.9 Hz, 1H), 6.11 (dt, *J* = 15.9, 6.6 Hz, 1H), 5.89 (ddt, *J* = 16.7, 10.1, 6.4 Hz, 1H), 5.17–5.01 (m, 2H), 3.93 (s, 3H), 2.96 (t, *J* = 6.5 Hz, 2H).

**<sup>13</sup>C NMR** (126 MHz, CDCl<sub>3</sub>): δ 163.4, 145.1, 136.4, 135.5, 129.7, 127.8, 127.1, 116.0, 110.9, 53.6, 37.2.

**HRMS** (ESI) *m/z* ([*M*+*H*]<sup>+</sup>) calcd for C<sub>11</sub>H<sub>14</sub>NO: 176.1070. Found: 176.1071.

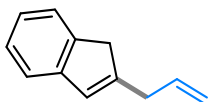

**2-Allyl-1H-indene (34).**

The title compound was prepared following the general procedure using 2-bromo-1H-indene (29.3 mg, 0.150 mmol, 1.0 equiv), allyl acetate (30.0 mg, 0.300 mmol, 2.0 equiv). After purification by column chromatography (using 2% ethyl acetate in petroleum ether), the title compound was isolated in 72% yield (16.8 mg) as a colorless oil. The spectral data were consistent with those which were reported in the literature<sup>11</sup> after comparison.

**<sup>1</sup>H NMR** (500 MHz, CDCl<sub>3</sub>): δ 7.38 (d, *J* = 7.4 Hz, 1H), 7.27 (d, *J* = 7.5 Hz, 1H), 7.22 (t, *J* = 7.4 Hz, 1H), 7.10 (t, *J* = 7.9 Hz, 1H), 6.54 (s, 1H), 5.97 (ddt, *J* = 16.9, 10.0, 6.8 Hz, 1H), 5.19–5.04 (m, 2H), 3.32 (s, 2H), 3.24 (d, *J* = 6.7 Hz, 2H).

**<sup>13</sup>C NMR** (126 MHz, CDCl<sub>3</sub>): δ 148.5, 145.6, 143.4, 136.3, 127.2, 126.4, 123.9, 123.6, 120.2, 116.3, 41.2, 35.9.

**HRMS** (ESI) *m/z* ([*M*-*H*]<sup>-</sup>) calcd for C<sub>12</sub>H<sub>11</sub>: 155.0866. Found: 155.0843.

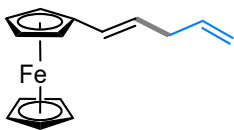

**Ferrocene penta-1,4-diene (35).**

The title compound was prepared following the general procedure using ferrocene vinyl bromide (43.5 mg, 0.150 mmol, 1.0 equiv), allyl acetate (30.0 mg, 0.300 mmol, 2.0 equiv). After purification by column chromatography (using 2% ethyl acetate in

petroleum ether), the title compound was isolated in 58% yield (21.9 mg) as a brown oil.

**<sup>1</sup>H NMR** (500 MHz, CDCl<sub>3</sub>): δ 6.13 (d, *J* = 15.7 Hz, 1H), 5.96–5.78 (m, 2H), 5.08 (dd, *J* = 24.8, 13.5 Hz, 2H), 4.31 (s, 2H), 4.17 (s, 2H), 4.10 (s, 5H), 2.83 (t, *J* = 5.7 Hz, 2H).

**<sup>13</sup>C NMR** (126 MHz, CDCl<sub>3</sub>): δ 137.1, 128.0, 125.5, 115.3, 84.0, 70.1, 69.2, 68.4, 66.5, 37.1, 29.8.

**HRMS** (ESI) *m/z* ([*M*+*H*]<sup>+</sup>) calcd for C<sub>15</sub>H<sub>17</sub>Fe: 253.0674. Found: 253.0648.

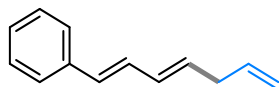

**((1*E*,3*E*)-Hpta-1,3,6-trien-1-yl)benzene (36).**

The title compound was prepared following the general procedure using ((1*E*,3*E*)-4-bromobuta-1,3-dien-1-yl)benzene (31.3 mg, 0.150 mmol, 1.0 equiv), allyl acetate (30.0 mg, 0.300 mmol, 2.0 equiv). After purification by column chromatography (using 2% ethyl acetate in petroleum ether), the title compound was isolated in 75% yield (19.2 mg) as a yellow oil. The spectral data were consistent with those which were reported in the literature<sup>12</sup> after comparison.

**<sup>1</sup>H NMR** (500 MHz, CDCl<sub>3</sub>): δ 7.39 (d, *J* = 7.3 Hz, 2H), 7.31 (t, *J* = 7.7 Hz, 2H), 7.21 (t, *J* = 7.3 Hz, 1H), 6.78 (dd, *J* = 15.7, 10.4 Hz, 1H), 6.48 (d, *J* = 15.7 Hz, 1H), 6.25 (dd, *J* = 14.9, 10.7 Hz, 1H), 5.95–5.80 (m, 2H), 5.15–5.01 (m, 2H), 2.91 (t, *J* = 6.1 Hz, 2H).

**<sup>13</sup>C NMR** (126 MHz, CDCl<sub>3</sub>): δ 137.7, 136.5, 132.8, 131.6, 130.7, 129.2, 128.7, 127.4, 126.3, 115.8, 37.0.

**HRMS** (ESI) *m/z* ([*M*-*H*]<sup>-</sup>) calcd for C<sub>13</sub>H<sub>13</sub>: 169.1023. Found: 169.1008.

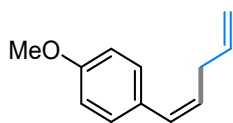

**(*Z*)-1-Methoxy-4-(penta-1,4-dien-1-yl)benzene (37).**

The title compound was prepared following the general procedure using (*Z*)-1-(2-bromovinyl)-4-methoxybenzene (32.0 mg, 0.150 mmol, 1.0 equiv), allyl acetate (30.0 mg, 0.300 mmol, 2.0 equiv). After purification by column chromatography (using 2% ethyl acetate in petroleum ether), the title compound was isolated in 67% yield (17.5 mg) as a colorless oil.

**<sup>1</sup>H NMR** (500 MHz, CDCl<sub>3</sub>): δ 7.21 (s, 2H), 6.87 (d, *J* = 8.7 Hz, 2H), 6.46 (d, *J* = 11.5 Hz, 1H), 5.92 (ddt, *J* = 16.2, 10.2, 6.0 Hz, 1H), 5.61 (dt, *J* = 11.5, 7.5 Hz, 1H), 5.18–5.01 (m, 2H), 3.81 (s, 3H), 3.06 (t, *J*

= 5.9 Hz, 2H).

**<sup>13</sup>C NMR** (126 MHz, CDCl<sub>3</sub>): δ 158.5, 137.0, 130.1, 130.0, 129.6, 128.1, 115.3, 113.7, 55.4, 32.9.

**HRMS** (ESI) m/z ([M+Na]<sup>+</sup>) calcd for C<sub>12</sub>H<sub>14</sub>NaO: 197.0937. Found: 197.1141.

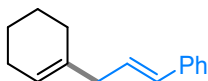

**(E)-(3-(Cyclohex-1-en-1-yl)prop-1-en-1-yl)benzene (38).**

The title compound was prepared following the general procedure using cyclohex-1-en-1-yl trifluoromethanesulfonate (34.5 mg, 0.150 mmol, 1.0 equiv), cinnamyl acetate (52.8 mg, 0.300 mmol, 2.0 equiv). After purification by column chromatography (using 2% ethyl acetate in petroleum ether), the title compound was isolated in 60% yield (17.8 mg) as a colorless oil. The spectral data were consistent with those which were reported in the literature<sup>13</sup> after comparison.

**<sup>1</sup>H NMR** (500 MHz, CDCl<sub>3</sub>): δ 7.37 (d, *J* = 7.3 Hz, 2H), 7.31 (t, *J* = 7.7 Hz, 2H), 7.21 (t, *J* = 7.3 Hz, 1H), 6.40 (d, *J* = 15.8 Hz, 1H), 6.23 (dt, *J* = 15.7, 7.1 Hz, 1H), 5.52 (s, 1H), 2.84 (d, *J* = 7.0 Hz, 2H), 2.10–1.93 (m, 4H), 1.72–1.53 (m, 4H).

**<sup>13</sup>C NMR** (126 MHz, CDCl<sub>3</sub>): δ 137.9, 136.6, 131.0, 129.1, 128.6, 127.0, 126.2, 122.3, 41.8, 28.6, 25.5, 23.1, 22.6.

**HRMS** (ESI) m/z ([M-H]<sup>-</sup>) calcd for C<sub>15</sub>H<sub>17</sub>: 197.1336. Found: 197.1319.

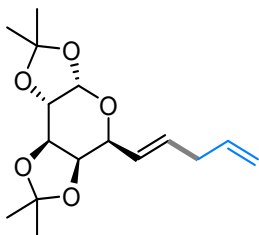

**(3a*S*,5*S*,5a*R*,8a*R*,8b*S*)-2,2,7,7-Tetramethyl-5-((*E*)-penta-1,4-dien-1-yl)tetrahydro-5*H*-bis([1,3]dioxolo)[4,5-*b*:4',5'-*d*]pyran (39).**

The title compound was prepared following the general procedure using (3a*S*,5*S*,5a*R*,8a*R*,8b*S*)-5-((*E*)-2-bromovinyl)-2,2,7,7-tetramethyltetrahydro-5*H*-bis([1,3]dioxolo)[4,5-*b*:4',5'-*d*]pyran (50.3 mg, 0.150 mmol, 1.0 equiv), allyl acetate (30.0 mg, 0.300 mmol, 2.0 equiv). After purification by column chromatography (using 5% ethyl acetate in petroleum ether), the title compound was isolated in 63% yield (27.9 mg) as a colorless oil.

**<sup>1</sup>H NMR** (500 MHz, CDCl<sub>3</sub>): δ 5.80 (dddd, *J* = 13.0, 8.3, 7.1, 3.5 Hz, 2H), 5.64 (dd, *J* = 15.6, 7.1 Hz, 1H), 5.55 (d, *J* = 5.0 Hz, 1H), 5.12–4.94 (m, 2H), 4.59 (dd, *J* = 7.9, 2.3 Hz, 1H), 4.29 (dd, *J* = 5.0, 2.4 Hz, 1H), 4.24 (d, *J* = 7.2 Hz, 1H), 4.17 (dd, *J* = 7.9, 2.0 Hz, 1H), 2.83 (t, *J* = 6.2 Hz, 2H), 1.53 (s, 3H), 1.46 (s, 3H), 1.34 (s, 3H), 1.33 (s, 3H).



**<sup>13</sup>C NMR** (150 MHz, CDCl<sub>3</sub>):  $\delta$  136.4, 132.7, 126.7, 115.8, 109.3, 108.5, 96.6, 73.7, 71.0, 70.5, 69.1, 36.7, 26.3, 26.1, 25.1, 24.5.

**HRMS** (ESI)  $m/z$  ([M+H]<sup>+</sup>) calcd for C<sub>16</sub>H<sub>25</sub>O<sub>5</sub>: 297.1697. Found: 297.1701.

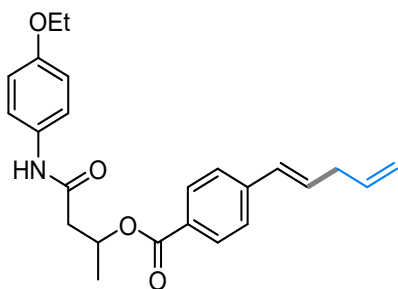

**4-((4-Ethoxyphenyl)amino)-4-oxobutan-2-yl-(E)-4-(penta-1,4-dien-1-yl)benzoate (41).**

The title compound was prepared following the general procedure using 4-((4-ethoxyphenyl)amino)-4-oxobutan-2-yl (E)-4-(2-bromovinyl)benzoate (64.8 mg, 0.150 mmol, 1.0 equiv), allyl acetate (30.0 mg, 0.300 mmol, 2.0 equiv). After purification by column chromatography (using 15% ethyl acetate in petroleum ether), the title compound was isolated in 73% yield (43.0 mg) as a white solid.

**<sup>1</sup>H NMR** (500 MHz, CDCl<sub>3</sub>):  $\delta$  7.94 (dt,  $J$  = 6.3, 4.8 Hz, 2H), 7.75 (s, 1H), 7.42–7.30 (m, 4H), 6.80 (d,  $J$  = 9.0 Hz, 2H), 6.51–6.19 (m, 2H), 5.99–5.77 (m, 1H), 5.54 (dd,  $J$  = 12.4, 6.2 Hz, 1H), 5.11 (ddd,  $J$  = 13.9, 12.0, 1.6 Hz, 1H), 3.97 (q,  $J$  = 7.0 Hz, 2H), 2.99 (td,  $J$  = 6.4, 1.2 Hz, 1H), 2.81 (dd,  $J$  = 14.5, 6.6 Hz, 1H), 2.66 (dd,  $J$  = 14.5, 5.8 Hz, 1H), 1.85 (d,  $J$  = 6.6 Hz, 2H), 1.49 (d,  $J$  = 6.3 Hz, 3H), 1.38 (t,  $J$  = 7.0 Hz, 3H).

**<sup>13</sup>C NMR** (126 MHz, CDCl<sub>3</sub>):  $\delta$  167.8, 166.0, 155.9, 142.5 (d,  $J$  = 18.5 Hz), 135.9, 132.4 (d,  $J$  = 28.9 Hz), 131.6 (d,  $J$  = 13.2 Hz), 130.8, 130.0 (d,  $J$  = 1.6 Hz), 128.6 (d,  $J$  = 7.4 Hz), 126.0, 122.0, 116.3, 114.8, 69.0, 63.8, 44.3, 37.2, 20.2, 14.9.

**HRMS** (ESI)  $m/z$  ([M+H]<sup>+</sup>) calcd for C<sub>24</sub>H<sub>28</sub>NO<sub>4</sub>: 394.2013. Found: 394.2014.

**M.p.:** 174–175 °C.

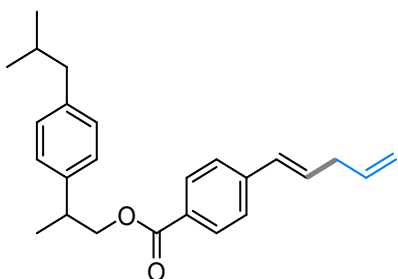

**2-(4-Isobutylphenyl)propyl-(E)-4-(penta-1,4-dien-1-yl)benzoate (42).**

The title compound was prepared following the general procedure using 2-(4-isobutylphenyl)propyl (E)-4-(2-bromovinyl)benzoate (60.1 mg, 0.150 mmol, 1.0 equiv), allyl acetate (30.0 mg, 0.300 mmol, 2.0 equiv). After purification by column chromatography (using 5% ethyl acetate in petroleum ether), the title compound was isolated in 89% yield (48.3 mg) as a

colorless oil.

**<sup>1</sup>H NMR** (500 MHz, CDCl<sub>3</sub>): δ 7.93 (d, *J* = 8.3 Hz, 2H), 7.39 (d, *J* = 8.3 Hz, 2H), 7.21 (d, *J* = 8.0 Hz, 2H), 7.12 (d, *J* = 7.9 Hz, 2H), 6.38 (ddd, *J* = 25.9, 15.8, 11.2 Hz, 2H), 5.98–5.83 (m, 1H), 5.24–5.01 (m, 2H), 4.39 (ddd, *J* = 27.7, 10.7, 7.1 Hz, 2H), 3.23 (dd, *J* = 14.0, 7.0 Hz, 1H), 3.00 (t, *J* = 5.9 Hz, 2H), 2.47 (d, *J* = 7.2 Hz, 2H), 1.87 (dt, *J* = 13.5, 6.8 Hz, 1H), 1.40 (d, *J* = 7.0 Hz, 3H), 0.91 (d, *J* = 6.6 Hz, 6H).

**<sup>13</sup>C NMR** (150 MHz, CDCl<sub>3</sub>): δ 166.5, 142.2, 140.5, 140.2, 136.0, 131.2, 130.2, 130.0, 129.3, 128.9, 127.1, 126.0, 116.2, 70.1, 45.2, 38.8, 37.2, 30.3, 22.5 (d, *J* = 3.0 Hz), 18.2.

**HRMS** (ESI) *m/z* ([M+Na]<sup>+</sup>) calcd for C<sub>25</sub>H<sub>30</sub>NaO<sub>2</sub>: 385.2138. Found: 385.2323.

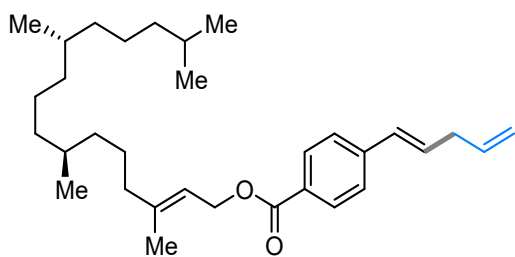

**(7*S*,11*R*,*E*)-3,7,11,15-Tetramethylhexadec-2-en-1-yl 4-((*E*)-penta-1,4-dien-1-yl)benzoate (43).**

The title compound was prepared following the general procedure using (7*S*,11*R*,*E*)-3,7,11,15-tetramethylhexadec-2-en-1-yl 4-((*E*)-2-bromovinyl)benzoate (75.7 mg, 0.150 mmol, 1.0 equiv), allyl acetate (30.0 mg, 0.300 mmol, 2.0 equiv). After purification by column chromatography (using 5% ethyl acetate in petroleum ether), the title compound was isolated in 86% yield (60.1 mg) as a colorless oil.

**<sup>1</sup>H NMR** (500 MHz, CDCl<sub>3</sub>): δ 7.97 (d, *J* = 8.4 Hz, 2H), 7.39 (d, *J* = 8.3 Hz, 2H), 6.38 (ddd, *J* = 26.3, 15.9, 11.2 Hz, 2H), 5.90 (ddt, *J* = 16.6, 10.1, 6.4 Hz, 1H), 5.46 (td, *J* = 7.0, 1.1 Hz, 1H), 5.15–5.06 (m, 2H), 4.83 (d, *J* = 7.0 Hz, 2H), 2.99 (td, *J* = 6.4, 1.3 Hz, 2H), 2.07–1.99 (m, 2H), 1.75 (s, 3H), 1.52 (dt, *J* = 13.3, 6.6 Hz, 1H), 1.45–1.34 (m, 4H), 1.32–1.20 (m, 10H), 1.16–1.10 (m, 3H), 0.85 (dd, *J* = 12.1, 6.2 Hz, 13H).

**<sup>13</sup>C NMR** (126 MHz, CDCl<sub>3</sub>): δ 166.7, 142.9, 142.1, 136.0, 131.2, 130.3, 130.1, 129.1, 126.0, 118.4, 116.3, 62.0, 40.0, 39.5, 37.6, 37.5, 37.4, 37.2, 36.8, 32.9, 32.8, 28.1, 25.2, 24.9, 24.6, 22.9, 22.8, 19.9 (d, *J* = 3.3 Hz), 16.6.

**HRMS** (ESI) *m/z* ([M+Na]<sup>+</sup>) calcd for C<sub>32</sub>H<sub>50</sub>NaO<sub>2</sub>: 489.3703. Found: 489.3702.

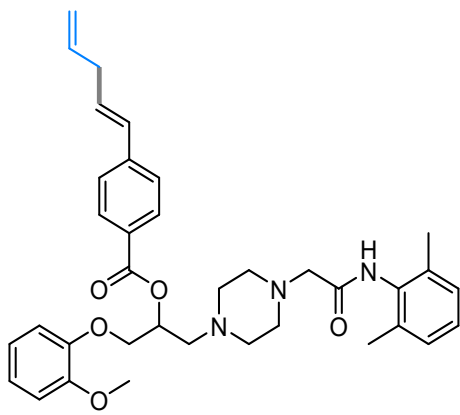

**1-(4-(2-((2,6-Dimethylphenyl)amino)-2-oxoethyl)piperazin-1-yl)-3-(2-methoxyphenoxy)propan-2-yl-(*E*)-4-(penta-1,4-dien-1-**

**yl)benzoate (44).**

The title compound was prepared following the general procedure using 1-(4-(2-((2,6-dimethylphenyl)amino)-2-oxoethyl)piperazin-1-yl)-3-(2-methoxyphenoxy)propan-2-yl-(*E*)-4-(2-bromovinyl)benzoate (95.4 mg, 0.150 mmol, 1.0 equiv), allyl acetate (30.0 mg, 0.300 mmol, 2.0 equiv). After purification by column chromatography (using 20% ethyl acetate in petroleum ether), the title compound was isolated in 68% yield (60.9 mg) as a yellow solid.

**<sup>1</sup>H NMR** (500 MHz, CDCl<sub>3</sub>): δ 8.66 (s, 1H), 7.94 (d, *J* = 8.3 Hz, 2H), 7.39 (d, *J* = 8.3 Hz, 2H), 7.09 (q, *J* = 4.3 Hz, 3H), 7.04–7.00 (m, 1H), 6.98–6.84 (m, 4H), 6.49 – 6.31 (m, 2H), 5.96–5.83 (m, 1H), 5.58–5.51 (m, 1H), 5.15–5.08 (m, 1H), 4.39–4.30 (m, 2H), 3.79 (s, 3H), 3.18 (s, 2H), 3.07–2.93 (m, 2H), 2.87–2.79 (m, 2H), 2.69 (s, 8H), 2.22 (s, 6H).

**<sup>13</sup>C NMR** (126 MHz, CDCl<sub>3</sub>): δ 168.6, 166.0, 150.3, 148.5, 142.4, 136.0, 135.1, 133.8, 131.4, 130.18, 130.16, 128.6, 128.4, 127.3, 126.0, 122.3, 121.1, 116.3, 115.6, 112.7, 70.8, 69.8, 61.8, 58.1, 56.1, 54.0 (d, *J* = 12.1 Hz), 37.2, 29.8, 18.8.

**HRMS** (ESI) *m/z* ([*M*+*H*]<sup>+</sup>) calcd for C<sub>36</sub>H<sub>44</sub>N<sub>3</sub>O<sub>5</sub>: 598.3275. Found: 598.3275.

**M.p.:** 75-76 °C.

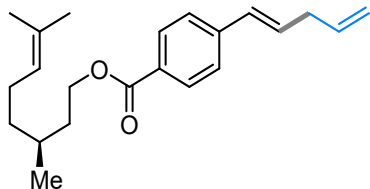**(*S*)-3,7-Dimethyloct-6-en-1-yl-(*E*)-4-(penta-1,4-dien-1-yl)benzoate (45).**

The title compound was prepared following the general procedure using (*S*)-3,7-dimethyloct-6-en-1-yl (*E*)-4-(2-bromovinyl)benzoate (54.8 mg, 0.150 mmol, 1.0 equiv), allyl acetate (30.0 mg, 0.300 mmol, 2.0 equiv). After purification by column chromatography (using 5% ethyl acetate in petroleum ether), the title compound was isolated in 81% yield (39.6 mg) as a colorless oil.

**<sup>1</sup>H NMR** (500 MHz, CDCl<sub>3</sub>): δ 7.97 (d, *J* = 8.2 Hz, 2H), 7.40 (d, *J* = 8.2 Hz, 2H), 6.38 (ddd, *J* = 26.4, 15.8, 11.2 Hz, 2H), 5.90 (ddt, *J* = 16.7, 10.1, 6.4 Hz, 1H), 5.12 (dd, *J* = 25.5, 5.8 Hz, 3H), 4.42–4.28 (m, 2H), 2.99 (t, *J* = 6.0 Hz, 2H), 2.09–1.95 (m, 2H), 1.82 (dt, *J* = 12.7, 7.1 Hz, 1H), 1.68 (s, 3H), 1.61 (s, 3H), 1.56 (dd, *J* = 14.0, 6.9 Hz, 1H), 1.41 (ddd, *J* = 21.3, 9.5, 6.0 Hz, 1H), 1.30–1.21 (m, 2H), 0.97 (d, *J* = 6.6 Hz, 3H).

**<sup>13</sup>C NMR** (126 MHz, CDCl<sub>3</sub>):  $\delta$  166.6, 142.1, 136.0, 131.5, 131.2, 130.2, 130.0, 129.0, 126.0, 124.7, 116.2, 63.5, 37.1 (d,  $J = 7.8$  Hz), 35.6, 29.7, 25.8, 25.5, 19.6, 17.8.

**HRMS** (ESI)  $m/z$  ( $[M+H]^+$ ) calcd for C<sub>22</sub>H<sub>31</sub>O<sub>2</sub>: 327.2319. Found: 327.2312.

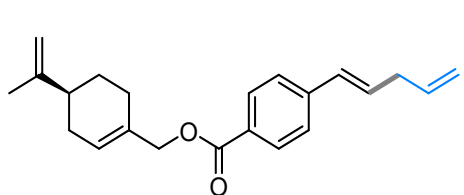

**(S)-4-(Prop-1-en-2-yl)cyclohex-1-en-1-ylmethyl-(E)-4-(penta-1,4-dien-1-yl)benzoate (46).**

The title compound was prepared following the general procedure using (*S*)-4-(prop-1-en-2-yl)cyclohex-1-en-1-ylmethyl (*E*)-4-(2-bromovinyl)benzoate (54.2 mg, 0.150 mmol, 1.0 equiv), allyl acetate (30.0 mg, 0.300 mmol, 2.0 equiv). After purification by column chromatography (using 5% ethyl acetate in petroleum ether), the title compound was isolated in 85% yield (41.1 mg) as a colorless oil.

**<sup>1</sup>H NMR** (500 MHz, CDCl<sub>3</sub>):  $\delta$  7.98 (d,  $J = 8.3$  Hz, 2H), 7.40 (d,  $J = 8.3$  Hz, 2H), 6.45 (d,  $J = 16.0$  Hz, 1H), 6.36 (dt,  $J = 15.8, 6.4$  Hz, 1H), 5.90 (ddt,  $J = 16.7, 10.1, 6.4$  Hz, 1H), 5.84 (s, 1H), 5.17–5.05 (m, 2H), 4.73 (dd,  $J = 10.2, 6.1$  Hz, 4H), 2.99 (t,  $J = 6.0$  Hz, 2H), 2.20–2.14 (m, 3H), 2.05–1.83 (m, 3H), 1.75 (s, 3H), 1.60–1.49 (m, 1H).

**<sup>13</sup>C NMR** (126 MHz, CDCl<sub>3</sub>):  $\delta$  166.4, 149.7, 142.2, 136.0, 132.9, 131.2, 130.2, 130.1, 128.8, 126.0, 125.7, 116.2, 108.9, 68.9, 41.0, 37.2, 35.0, 30.6, 27.5, 26.6.

**HRMS** (ESI)  $m/z$  ( $[M+H]^+$ ) calcd for C<sub>22</sub>H<sub>27</sub>O<sub>2</sub>: 323.2006. Found: 323.2003.

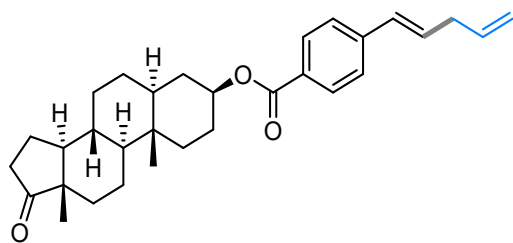

**(3*S*,5*S*,8*R*,9*S*,10*S*,13*S*,14*S*)-10,13-Dimethyl-17-oxohexadecahydro-1*H*-cyclopenta[*a*]phenanthren-3-yl 4-((*E*)-penta-1,4-dien-1-yl)benzoate (47).**

The title compound was prepared following the general procedure using (*3S,5S,8R,9S,10S,13S,14S*)-10,13-dimethyl-17-oxohexadecahydro-1*H*-cyclopenta[*a*]phenanthren-3-yl 4-((*E*)-2-bromovinyl)benzoate (75.0 mg, 0.150 mmol, 1.0 equiv), allyl acetate (30.0 mg, 0.300 mmol, 2.0 equiv). After purification by column chromatography (using 5% ethyl acetate in petroleum ether), the title compound was isolated in 84% yield (57.9 mg) as a white solid.

**<sup>1</sup>H NMR** (500 MHz, CDCl<sub>3</sub>):  $\delta$  7.93 (d,  $J$  = 8.3 Hz, 2H), 7.37 (d,  $J$  = 8.3 Hz, 2H), 6.45–6.29 (m, 2H), 5.93–5.82 (m, 1H), 5.15–5.01 (m, 2H), 4.90 (dt,  $J$  = 16.1, 5.5 Hz, 1H), 2.96 (t,  $J$  = 6.4 Hz, 2H), 2.41 (dd,  $J$  = 19.3, 8.6 Hz, 1H), 2.04 (dd,  $J$  = 16.5, 6.5 Hz, 1H), 1.91 (dd,  $J$  = 12.0, 6.0 Hz, 2H), 1.79 (dd,  $J$  = 10.3, 7.0 Hz, 4H), 1.63 (ddd,  $J$  = 12.1, 5.1, 2.4 Hz, 2H), 1.55–1.44 (m, 3H), 1.37–1.26 (m, 6H), 1.11–1.05 (m, 1H), 0.99–0.96 (m, 1H), 0.87 (s, 3H), 0.84 (s, 3H), 0.75–0.69 (m, 1H).

**<sup>13</sup>C NMR** (126 MHz, CDCl<sub>3</sub>):  $\delta$  166.0, 142.0, 135.9, 132.3, 131.0, 130.1, 129.9, 129.3, 125.8, 116.2, 74.0, 54.4, 51.4, 47.8, 44.7, 37.1, 36.8, 35.9, 35.7, 35.1, 34.1, 31.6, 30.9, 28.4, 27.6, 21.8, 20.5, 13.9, 12.3.

**HRMS** (ESI)  $m/z$  ([M+H]<sup>+</sup>) calcd for C<sub>31</sub>H<sub>41</sub>O<sub>3</sub>: 461.3050. Found: 461.3051.

**M.p.**: 137-139 °C.

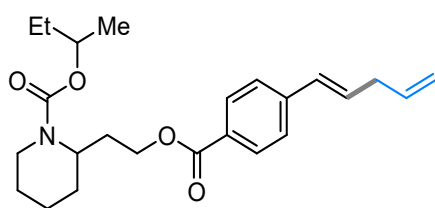

***sec*-Butyl-(*E*)-2-(2-((4-(penta-1,4-dien-1-yl)benzoyl)oxy)ethyl)piperidine-1-carboxylate (48).**

The title compound was prepared following the general procedure using *sec*-butyl (*E*)-2-(2-((4-(2-bromovinyl)benzoyl)oxy)ethyl)piperidine-1-carboxylate (65.7 mg, 0.150 mmol, 1.0 equiv), allyl acetate (30.0 mg, 0.300 mmol, 2.0 equiv). After purification by column chromatography (using 20% ethyl acetate in petroleum ether), the title compound was isolated in 73% yield (43.7 mg) as a colorless oil.

**<sup>1</sup>H NMR** (500 MHz, CDCl<sub>3</sub>):  $\delta$  7.96 (d,  $J$  = 8.2 Hz, 2H), 7.39 (d,  $J$  = 8.3 Hz, 2H), 6.39 (ddd,  $J$  = 22.3, 15.9, 5.0 Hz, 2H), 5.95–5.83 (m, 1H), 5.18–5.03 (m, 2H), 4.74 (ddd,  $J$  = 12.6, 6.3, 1.6 Hz, 1H), 4.52 (s, 1H), 4.32–4.29 (m, 2H), 4.08 (s, 1H), 2.99 (t,  $J$  = 6.4 Hz, 2H), 2.86 (t,  $J$  = 13.2 Hz, 1H), 2.23–2.17 (m, 1H), 1.90–1.85 (m, 1H), 1.70–1.56 (m, 8H), 1.17 (d,  $J$  = 6.3 Hz, 3H), 0.87 (s, 3H).

**<sup>13</sup>C NMR** (126 MHz, CDCl<sub>3</sub>):  $\delta$  166.5, 155.7 (d,  $J$  = 4.0 Hz), 142.2, 136.0, 131.2, 130.2, 130.0, 128.8, 126.0, 116.2, 73.1, 62.7 (d,  $J$  = 4.9 Hz), 48.2 (d,  $J$  = 4.0 Hz), 39.1, 37.2, 29.8, 29.2, 25.6, 22.8, 19.9, 19.2, 9.8 (d,  $J$  = 3.1 Hz).

**HRMS** (ESI)  $m/z$  ([M+H]<sup>+</sup>) calcd for C<sub>24</sub>H<sub>34</sub>NO<sub>4</sub>: 400.2482. Found: 400.2485.

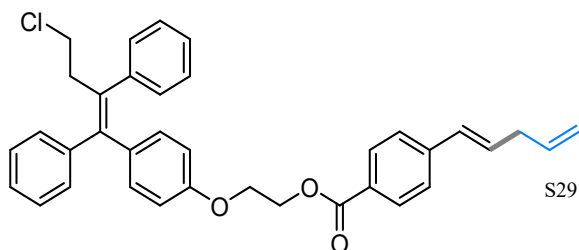

**2-(4-((*Z*)-4-chloro-1,2-diphenylbut-1-en-1-yl)phenoxy)ethyl-4-((*E*)-penta-1,4-dien-1-**

**yl)benzoate (49).**

The title compound was prepared following the general procedure using 2-(4-((*Z*)-4-chloro-1,2-diphenylbut-1-en-1-yl)phenoxy)ethyl 4-((*E*)-2-bromovinyl)benzoate (88.2 mg, 0.150 mmol, 1.0 equiv), allyl acetate (30.0 mg, 0.300 mmol, 2.0 equiv). After purification by column chromatography (using 10% ethyl acetate in petroleum ether), the title compound was isolated in 80% yield (65.8 mg) as a colorless solid.

**<sup>1</sup>H NMR** (500 MHz, CDCl<sub>3</sub>): δ 7.96 (d, *J* = 8.4 Hz, 2H), 7.42–7.36 (m, 4H), 7.33–7.28 (m, 3H), 7.21 (d, *J* = 6.5 Hz, 2H), 7.16 (d, *J* = 7.2 Hz, 3H), 6.82 (d, *J* = 8.8 Hz, 2H), 6.61 (d, *J* = 8.8 Hz, 2H), 6.39 (ddd, *J* = 24.1, 15.9, 11.2 Hz, 2H), 5.92 (ddt, *J* = 16.7, 10.1, 6.4 Hz, 1H), 5.13 (ddd, *J* = 14.3, 13.0, 1.5 Hz, 2H), 4.60–4.55 (m, 2H), 4.20–4.14 (m, 2H), 3.43 (t, *J* = 7.4 Hz, 2H), 3.00 (t, *J* = 7.0 Hz, 2H), 2.94 (t, *J* = 7.5 Hz, 2H).

**<sup>13</sup>C NMR** (126 MHz, CDCl<sub>3</sub>): δ 166.4, 156.9, 143.0, 142.4, 141.8, 141.0, 135.9, 135.5, 135.4, 131.9, 131.4, 130.2, 130.1, 129.6, 129.5, 128.5, 128.4, 127.1, 126.7, 126.0, 116.3, 113.7, 65.9, 63.3, 43.0, 38.7, 37.2, 29.8.

**HRMS** (ESI) *m/z* ([*M*+*H*]<sup>+</sup>) calcd for C<sub>36</sub>H<sub>34</sub>ClO<sub>3</sub>: 549.2191. Found: 549.2192.

**M.p.**: 55-56 °C.

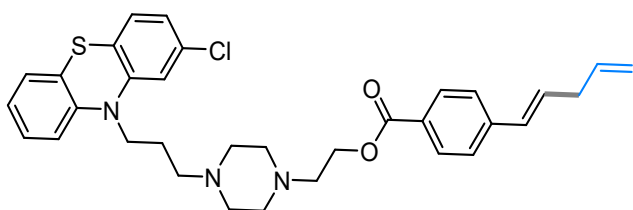

**2-(4-(3-(2-Chloro-10*H*-phenothiazin-10-yl)propyl)piperazin-1-yl)ethyl-(*E*)-4-(penta-1,4-dien-1-yl)benzoate (50).**

The title compound was prepared following the general procedure using 2-(4-(3-(2-chloro-10*H*-phenothiazin-10-yl)propyl)piperazin-1-yl)ethyl (*E*)-4-(2-bromovinyl)benzoate (91.9 mg, 0.150 mmol, 1.0 equiv), allyl acetate (30.0 mg, 0.300 mmol, 2.0 equiv). After purification by column chromatography (using 20% ethyl acetate in petroleum ether), the title compound was isolated in 62% yield (53.4 mg) as a yellow oil.

**<sup>1</sup>H NMR** (500 MHz, CDCl<sub>3</sub>): δ 7.95 (d, *J* = 8.2 Hz, 2H), 7.40 (d, *J* = 8.2 Hz, 2H), 7.18–7.07 (m, 2H), 7.01 (d, *J* = 8.1 Hz, 1H), 6.95–6.82 (m, 4H), 6.52–6.30 (m, 2H), 5.90 (ddt, *J* = 16.7, 10.0, 6.5 Hz, 1H),

5.17–5.04 (m, 2H), 4.43 (t,  $J = 5.7$  Hz, 2H), 3.90 (t,  $J = 6.8$  Hz, 2H), 2.99 (t,  $J = 6.0$  Hz, 2H), 2.77 (t,  $J = 5.7$  Hz, 2H), 2.51 (dd,  $J = 33.7, 26.9$  Hz, 10H), 1.98–1.91 (m, 2H).

**$^{13}\text{C}$  NMR** (126 MHz,  $\text{CDCl}_3$ ):  $\delta$  166.4, 146.6, 144.6, 136.0, 134.0, 133.4, 131.4, 130.2, 130.1, 128.7, 128.0, 127.6, 127.5, 126.0, 124.9, 123.7, 123.0, 122.4, 116.3, 115.99, 115.96, 62.7, 56.7, 55.6, 53.3, 45.5, 37.2, 32.1, 29.8.

**HRMS** (ESI)  $m/z$  ( $[\text{M}+\text{H}]^+$ ) calcd for  $\text{C}_{33}\text{H}_{37}\text{ClN}_3\text{O}_2\text{S}$ : 574.2290. Found: 574.2286.

#### IV. Vinylation of $\beta$ -Elemene

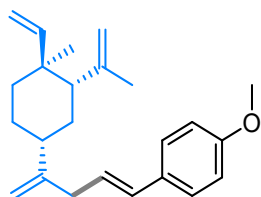

**1-Methoxy-4-((*E*)-4-((1*R*,3*S*,4*S*)-4-methyl-3-(prop-1-en-2-yl)-4-vinylcyclohexyl)penta-1,4-dien-1-yl)benzene (51).**

The title compound was prepared following the general procedure using (*E*)-1-(2-bromovinyl)-4-methoxybenzene (32.0 mg, 0.150 mmol, 1.0 equiv), 2-((1*R*,3*S*,4*S*)-4-methyl-3-(prop-1-en-2-yl)-4-vinylcyclohexyl)allyl acetate (78.7 mg, 0.300 mmol, 2.0 equiv). After purification by column chromatography (using 2% ethyl acetate in petroleum ether), the title compound was isolated in 86% yield (43.3 mg) as a colorless oil.

**$^1\text{H}$  NMR** (500 MHz,  $\text{CDCl}_3$ ):  $\delta$  7.31 (d,  $J = 8.7$  Hz, 2H), 6.85 (d,  $J = 8.7$  Hz, 2H), 6.37 (d,  $J = 15.8$  Hz, 1H), 6.08 (dt,  $J = 15.7, 7.1$  Hz, 1H), 5.83 (dd,  $J = 17.4, 10.9$  Hz, 1H), 4.92 (dd,  $J = 8.1, 1.2$  Hz, 1H), 4.89 (s, 1H), 4.87 (s, 1H), 4.83 (dd,  $J = 5.0, 1.3$  Hz, 2H), 4.61 (s, 1H), 3.81 (s, 3H), 2.95 (d,  $J = 7.0$  Hz, 2H), 2.02 (dd,  $J = 11.8, 4.3$  Hz, 2H), 1.72 (s, 3H), 1.64–1.59 (m, 2H), 1.54–1.42 (m, 4H), 1.02 (s, 3H).

**$^{13}\text{C}$  NMR** (126 MHz,  $\text{CDCl}_3$ ):  $\delta$  158.9, 153.4, 150.4, 147.8, 130.8, 130.6, 127.3, 126.6, 114.1, 112.3, 110.0, 108.8, 55.4, 52.9, 44.3, 40.1, 40.0, 38.8, 33.4, 27.3, 24.9, 16.8.

**HRMS** (ESI)  $m/z$  ( $[\text{M}-\text{H}]^-$ ) calcd for  $\text{C}_{24}\text{H}_{31}\text{O}$ : 335.2380. Found: 335.2380.

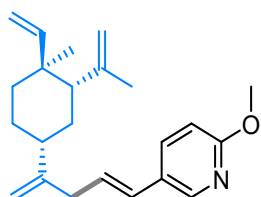

**2-Methoxy-5-((*E*)-4-((1*R*,3*S*,4*S*)-4-methyl-3-(prop-1-en-2-yl)-4-vinylcyclohexyl)penta-1,4-dien-1-yl)pyridine (52).**

The title compound was prepared following the general procedure using (*E*)-5-(2-bromovinyl)-2-methoxypyridine (32.1 mg, 0.150 mmol, 1.0 equiv), 2-

((1*R*,3*S*,4*S*)-4-methyl-3-(prop-1-en-2-yl)-4-vinylcyclohexyl)allyl acetate (78.7 mg, 0.300 mmol, 2.0 equiv). After purification by column chromatography (using 5% ethyl acetate in petroleum ether), the title compound was isolated in 73% yield (36.9 mg) as a colorless oil.

**<sup>1</sup>H NMR** (500 MHz, CDCl<sub>3</sub>): δ 8.08 (t, *J* = 5.5 Hz, 1H), 7.64 (dd, *J* = 8.6, 2.4 Hz, 1H), 6.69 (d, *J* = 8.6 Hz, 1H), 6.34 (d, *J* = 15.9 Hz, 1H), 6.10 (dt, *J* = 15.8, 7.0 Hz, 1H), 5.81 (dd, *J* = 17.3, 11.0 Hz, 1H), 4.99–4.75 (m, 5H), 4.59 (s, 1H), 3.93 (s, 3H), 2.95 (d, *J* = 6.9 Hz, 2H), 1.99 (ddd, *J* = 15.9, 11.2, 5.0 Hz, 2H), 1.71 (s, 3H), 1.65–1.56 (m, 3H), 1.50–1.41 (m, 3H), 1.01 (s, 3H).

**<sup>13</sup>C NMR** (126 MHz, CDCl<sub>3</sub>): δ 163.4, 153.1, 150.3, 147.8, 145.1, 135.5, 128.2, 127.5, 127.0, 112.3, 110.9, 110.1, 109.0, 53.6, 52.9, 44.4, 40.0 (d, *J* = 11.8 Hz), 38.8, 33.4, 29.8, 27.3, 24.9, 16.8.

**HRMS** (ESI) *m/z* ([*M*+*H*]<sup>+</sup>) calcd for C<sub>23</sub>H<sub>32</sub>NO: 338.2478. Found: 338.2475.

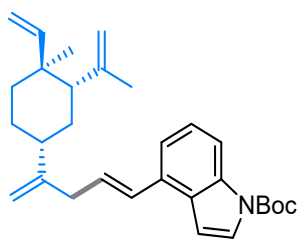

***tert*-Butyl-4-((*E*)-4-((1*R*,3*S*,4*S*)-4-methyl-3-(prop-1-en-2-yl)-4-vinylcyclohexyl)penta-1,4-dien-1-yl)-1*H*-indole-1-carboxylate (53).**

The title compound was prepared following the general procedure using *tert*-butyl (*E*)-4-(2-bromovinyl)-1*H*-indole-1-carboxylate (48.3 mg, 0.150 mmol, 1.0 equiv), 2-((1*R*,3*S*,4*S*)-4-methyl-3-(prop-1-en-2-yl)-4-vinylcyclohexyl)allyl acetate (78.7 mg, 0.300 mmol, 2.0 equiv). After purification by column chromatography (using 5% ethyl acetate in petroleum ether), the title compound was isolated in 75% yield (50.1 mg) as a colorless oil.

**<sup>1</sup>H NMR** (500 MHz, CDCl<sub>3</sub>): δ 8.01 (d, *J* = 7.7 Hz, 1H), 7.59 (d, *J* = 3.6 Hz, 1H), 7.32 (d, *J* = 7.5 Hz, 1H), 7.24 (t, *J* = 3.9 Hz, 1H), 6.72 (d, *J* = 3.3 Hz, 2H), 6.32 (dt, *J* = 15.7, 7.1 Hz, 1H), 5.80 (dd, *J* = 17.4, 10.9 Hz, 1H), 4.93–4.77 (m, 5H), 4.58 (s, 1H), 3.02 (d, *J* = 7.0 Hz, 2H), 2.00 (dd, *J* = 12.0, 3.9 Hz, 2H), 1.70 (s, 3H), 1.65 (s, 12H), 1.46 (ddd, *J* = 9.0, 7.8, 2.6 Hz, 3H), 1.00 (s, 3H).

**<sup>13</sup>C NMR** (126 MHz, CDCl<sub>3</sub>): δ 153.2, 150.4, 147.8, 135.6, 134.2, 130.4 (d, *J* = 8.5 Hz), 128.6, 125.9, 124.5, 119.4, 115.4, 114.7, 113.9, 112.3, 110.0, 109.1, 105.6, 83.8, 52.9, 44.4, 40.0 (d, *J* = 12.6 Hz), 39.2, 33.4, 29.9, 28.3, 27.4, 24.9, 16.8.

**HRMS** (ESI) *m/z* ([*M*-*H*]<sup>-</sup>) calcd for C<sub>30</sub>H<sub>38</sub>NO<sub>2</sub>: 444.2908. Found: 444.2908.

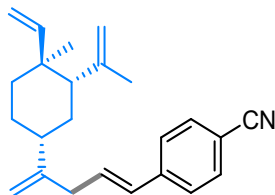

**4-((*E*)-4-((1*R*,3*S*,4*S*)-4-methyl-3-(prop-1-en-2-yl)-4-**



**vinylcyclohexyl)penta-1,4-dien-1-yl)benzotrile (54).**

The title compound was prepared following the general procedure using (*E*)-4-(2-bromovinyl)benzotrile (31.2 mg, 0.150 mmol, 1.0 equiv), 2-((1*R*,3*S*,4*S*)-4-methyl-3-(prop-1-en-2-yl)-4-vinylcyclohexyl)allyl acetate (78.7 mg, 0.300 mmol, 2.0 equiv). After purification by column chromatography (using 5% ethyl acetate in petroleum ether), the title compound was isolated in 80% yield (39.7 mg) as a colorless oil.

**<sup>1</sup>H NMR** (500 MHz, CDCl<sub>3</sub>): δ 7.75 (d, *J* = 8.3 Hz, 2H), 7.43 (d, *J* = 8.3 Hz, 2H), 6.36 (ddd, *J* = 30.6, 15.8, 11.4 Hz, 2H), 5.81 (dd, *J* = 17.3, 11.0 Hz, 1H), 4.94–4.87 (m, 3H), 4.82 (d, *J* = 5.9 Hz, 2H), 4.59 (s, 1H), 2.99 (d, *J* = 6.8 Hz, 2H), 2.01 (dt, *J* = 18.0, 10.4 Hz, 2H), 1.71 (s, 3H), 1.64–1.56 (m, 3H), 1.52–1.42 (m, 3H), 1.01 (s, 3H).

**<sup>13</sup>C NMR** (126 MHz, CDCl<sub>3</sub>): δ 169.1, 152.7, 150.3, 147.8, 141.5, 131.6, 130.5, 127.9, 126.3, 112.3, 110.1, 109.3, 100.1, 52.9, 44.5, 40.0 (d, *J* = 9.9 Hz), 38.8, 33.4, 29.8, 27.3, 24.9, 16.8.

**HRMS** (ESI) *m/z* ([*M*+*H*]<sup>+</sup>) calcd for C<sub>24</sub>H<sub>30</sub>N: 332.2373. Found: 332.2378.

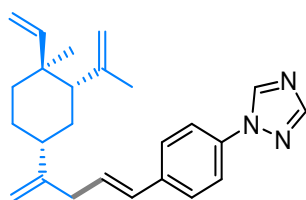

**1-(4-((*E*)-4-((1*R*,3*S*,4*S*)-4-Methyl-3-(prop-1-en-2-yl)-4-vinylcyclohexyl)penta-1,4-dien-1-yl)phenyl)-1*H*-1,2,4-triazole (55).**

The title compound was prepared following the general procedure using (*E*)-1-(4-(2-bromovinyl)phenyl)-1*H*-1,2,4-triazole (37.5 mg, 0.150 mmol, 1.0 equiv), 2-((1*R*,3*S*,4*S*)-4-methyl-3-(prop-1-en-2-yl)-4-vinylcyclohexyl)allyl acetate (78.7 mg, 0.300 mmol, 2.0 equiv). After purification by column chromatography (using 5% ethyl acetate in petroleum ether), the title compound was isolated in 77% yield (43.1 mg) as a colorless oil.

**<sup>1</sup>H NMR** (500 MHz, CDCl<sub>3</sub>): δ 8.54 (s, 1H), 8.10 (s, 1H), 7.61 (d, *J* = 8.5 Hz, 2H), 7.49 (d, *J* = 8.6 Hz, 2H), 6.44 (d, *J* = 15.8 Hz, 1H), 6.29 (dt, *J* = 15.8, 7.0 Hz, 1H), 5.82 (dd, *J* = 17.3, 11.0 Hz, 1H), 4.97–4.87 (m, 3H), 4.83 (d, *J* = 1.4 Hz, 2H), 4.60 (s, 1H), 2.99 (d, *J* = 6.9 Hz, 2H), 2.06–1.97 (m, 2H), 1.71 (s, 3H), 1.64–1.58 (m, 3H), 1.52–1.42 (m, 3H), 1.01 (s, 3H).

**<sup>13</sup>C NMR** (126 MHz, CDCl<sub>3</sub>): δ 152.8, 152.7, 150.3, 147.8, 140.8, 137.9, 135.7, 130.5, 130.1, 127.4, 120.3, 112.3, 110.1, 109.3, 52.9, 44.5, 40.1, 40.0, 38.8, 33.4, 27.3, 24.9, 16.8.

**HRMS** (ESI) *m/z* ([*M*+*H*]<sup>+</sup>) calcd for C<sub>25</sub>H<sub>32</sub>N<sub>3</sub>: 374.2591. Found: 374.2590.

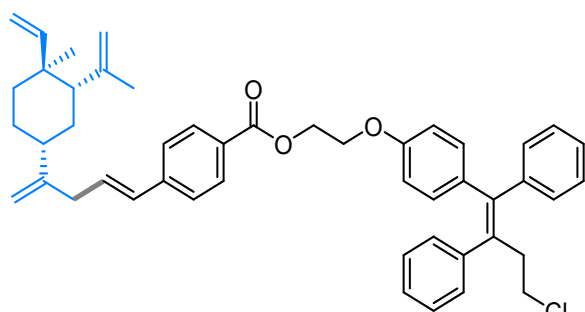

**2-(4-((Z)-4-Chloro-1,2-diphenylbut-1-en-1-yl)phenoxy)ethyl 4-((E)-2-bromovinyl)benzoate (56).**

The title compound was prepared following the general procedure using 2-(4-((Z)-4-chloro-1,2-diphenylbut-1-en-1-yl)phenoxy)ethyl 4-((E)-2-bromovinyl)benzoate (88.2 mg, 0.150 mmol, 1.0 equiv), 2-((1R,3S,4S)-4-methyl-3-(prop-1-en-2-yl)-4-vinylcyclohexyl)allyl acetate (78.7 mg, 0.300 mmol, 2.0 equiv). After purification by column chromatography (using 5% ethyl acetate in petroleum ether), the title compound was isolated in 81% yield (86.4 mg) as a colorless oil.

**<sup>1</sup>H NMR** (500 MHz, CDCl<sub>3</sub>): δ 7.96 (d, *J* = 8.2 Hz, 2H), 7.42–7.36 (m, 4H), 7.31 (d, *J* = 6.2 Hz, 3H), 7.23–7.19 (m, 2H), 7.16 (d, *J* = 7.2 Hz, 3H), 6.82 (d, *J* = 8.7 Hz, 2H), 6.61 (d, *J* = 8.7 Hz, 2H), 6.51–6.31 (m, 2H), 5.86–5.80 (m, 1H), 5.11 (d, *J* = 13.8 Hz, 1H), 4.92 (s, 1H), 4.91 (s, 1H), 4.84 (d, *J* = 6.9 Hz, 2H), 4.61 (s, 1H), 4.59–4.56 (m, 2H), 4.20–4.14 (m, 2H), 3.43 (t, *J* = 7.4 Hz, 2H), 3.00 (d, *J* = 8.7 Hz, 2H), 2.95–2.91 (m, 2H), 2.05–2.00 (m, 2H), 1.73 (s, 3H), 1.62 (dd, *J* = 7.5, 3.3 Hz, 2H), 1.51–1.45 (m, 4H), 1.03 (s, 3H).

**<sup>13</sup>C NMR** (126 MHz, CDCl<sub>3</sub>): δ 166.4, 156.9, 152.6, 150.2, 148.9, 147.7, 142.9, 142.4, 141.7, 141.0, 135.4 (d, *J* = 5.3 Hz), 131.93, 131.86, 130.6, 130.2, 129.6, 129.5, 128.5, 128.3, 127.1, 126.7, 126.0, 113.7, 113.1, 112.3, 110.1, 109.3, 79.5, 65.9, 63.3, 52.8, 44.4, 42.3, 41.6, 40.0 (d, *J* = 9.6 Hz), 38.7 (d, *J* = 14.8 Hz), 33.3, 29.8, 27.3, 24.9.

**HRMS** (ESI) *m/z* ([*M*+Na]<sup>+</sup>) calcd for C<sub>48</sub>H<sub>51</sub>ClNaO<sub>3</sub>: 733.3419. Found: 733.3482.

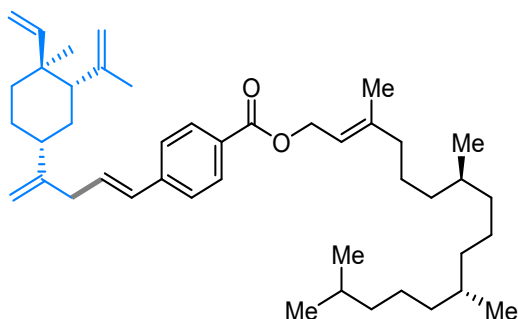

**(7S,11R,E)-3,7,11,15-Tetramethylhexadec-2-en-1-yl 4-((E)-2-bromovinyl)benzoate (57).**

The title compound was prepared following the

general procedure using (7*S*,11*R*,*E*)-3,7,11,15-tetramethylhexadec-2-en-1-yl 4-((*E*)-2-bromovinyl)benzoate (75.8 mg, 0.150 mmol, 1.0 equiv), 2-((1*R*,3*S*,4*S*)-4-methyl-3-(prop-1-en-2-yl)-4-vinylcyclohexyl)allyl acetate (78.7 mg, 0.300 mmol, 2.0 equiv). After purification by column chromatography (using 5% ethyl acetate in petroleum ether), the title compound was isolated in 78% yield (73.6 mg) as a colorless oil.

**<sup>1</sup>H NMR** (500 MHz, CDCl<sub>3</sub>): δ 7.98 (d, *J* = 8.4 Hz, 2H), 7.40 (d, *J* = 8.4 Hz, 2H), 6.54–6.26 (m, 2H), 5.82 (dd, *J* = 17.3, 11.0 Hz, 1H), 5.46 (dd, *J* = 7.0, 6.0 Hz, 1H), 4.93–4.89 (m, 2H), 4.83 (dd, *J* = 5.9, 4.0 Hz, 3H), 4.60 (s, 1H), 3.20 (dt, *J* = 13.3, 5.0 Hz, 1H), 2.99 (d, *J* = 6.8 Hz, 2H), 2.07–1.98 (m, 5H), 1.95–1.89 (m, 2H), 1.75 (s, 3H), 1.71 (s, 3H), 1.63–1.57 (m, 5H), 1.48 (ddd, *J* = 13.1, 9.9, 5.1 Hz, 8H), 1.16–1.12 (m, 5H), 1.09–1.05 (m, 5H), 1.01 (s, 3H), 0.86 (d, *J* = 5.5 Hz, 12H).

**<sup>13</sup>C NMR** (126 MHz, CDCl<sub>3</sub>): δ 166.7, 152.7, 150.3, 147.7, 142.9, 142.1, 131.7, 130.7, 130.1, 129.0, 126.0, 118.4, 112.3, 110.1, 109.3, 62.0, 55.9, 52.9, 44.5, 40.1, 39.8, 39.5, 38.8, 37.6, 37.5, 37.4, 36.8, 35.1, 33.4, 32.9 (d, *J* = 15.3 Hz), 29.8, 28.1, 27.3, 25.6, 25.2, 24.9, 24.6, 22.8 (d, *J* = 11.7 Hz), 19.9 (d, *J* = 3.7 Hz), 16.7 (d, *J* = 18.4 Hz), 14.3.

**HRMS** (ESI) *m/z* ([*M*+*H*]<sup>+</sup>) calcd for C<sub>44</sub>H<sub>69</sub>O<sub>2</sub>: 629.5292. Found: 629.5291.

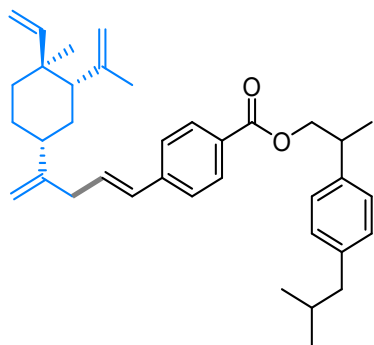

**2-(4-Isobutylphenyl)propyl-4-((*E*)-4-((1*R*,3*S*,4*S*)-4-methyl-3-(prop-1-en-2-yl)-4-vinylcyclohexyl)penta-1,4-dien-1-yl)benzoate (58).**

The title compound was prepared following the general procedure using 2-(4-isobutylphenyl)propyl (*E*)-4-(2-bromovinyl)benzoate (60.2 mg, 0.150 mmol, 1.0 equiv), 2-((1*R*,3*S*,4*S*)-4-methyl-3-(prop-1-en-2-yl)-4-vinylcyclohexyl)allyl acetate (78.7 mg, 0.300 mmol, 2.0 equiv). After purification by column chromatography (using 5% ethyl acetate in petroleum ether), the title compound was isolated in 86% yield (67.6 mg) as a colorless oil.

**<sup>1</sup>H NMR** (500 MHz, CDCl<sub>3</sub>): δ 7.91 (d, *J* = 7.9 Hz, 2H), 7.38 (d, *J* = 8.0 Hz, 2H), 7.19 (d, *J* = 7.7 Hz,

2H), 7.10 (d,  $J = 7.7$  Hz, 2H), 6.49–6.30 (m, 2H), 5.82 (d,  $J = 6.4$  Hz, 1H), 5.01 (s, 1H), 4.93–4.92 (m, 1H), 4.89 (s, 1H), 4.83 (s, 2H), 4.58–4.57 (m, 1H), 4.42–4.31 (m, 2H), 3.21 (dd,  $J = 13.9, 7.0$  Hz, 1H), 2.99 (d,  $J = 6.7$  Hz, 2H), 2.45 (d,  $J = 7.1$  Hz, 2H), 2.09 (s, 3H), 2.01 (d,  $J = 6.8$  Hz, 2H), 1.85 (dt,  $J = 13.3, 6.7$  Hz, 1H), 1.60 (s, 2H), 1.47 (s, 4H), 1.38 (d,  $J = 6.8$  Hz, 3H), 0.99 (s, 3H), 0.90 (d,  $J = 6.6$  Hz, 6H).

**$^{13}\text{C}$  NMR** (126 MHz,  $\text{CDCl}_3$ ):  $\delta$  170.8, 152.6, 150.1, 148.5, 147.6, 147.4, 142.1, 140.5, 140.1, 130.7, 130.0, 129.3, 127.1, 125.9, 112.4, 111.0, 110.1, 66.2, 52.8, 45.1, 44.4, 41.9, 39.9, 38.8, 33.1, 30.3, 27.1, 24.9, 22.5 (d,  $J = 3.1$  Hz), 21.1, 18.1, 16.7.

**HRMS** (ESI)  $m/z$  ( $[\text{M}+\text{H}]^+$ ) calcd for  $\text{C}_{37}\text{H}_{49}\text{O}_2$ : 525.3727. Found: 525.3722.

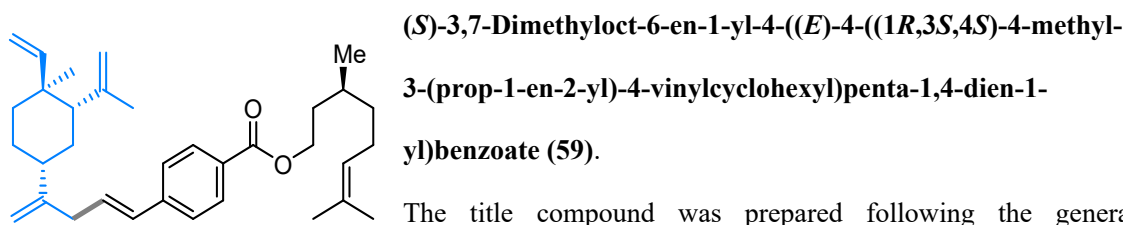

The title compound was prepared following the general procedure using (*S*)-3,7-dimethyloct-6-en-1-yl (*E*)-4-(2-bromovinyl)benzoate (54.8 mg, 0.150 mmol, 1.0 equiv), 2-((1*R*,3*S*,4*S*)-4-methyl-3-(prop-1-en-2-yl)-4-vinylcyclohexyl)allyl acetate (78.7 mg, 0.300 mmol, 2.0 equiv). After purification by column chromatography (using 5% ethyl acetate in petroleum ether), the title compound was isolated in 87% yield (63.7 mg) as a colorless oil.

**$^1\text{H}$  NMR** (500 MHz,  $\text{CDCl}_3$ ):  $\delta$  7.97 (d,  $J = 7.9$  Hz, 2H), 7.41 (d,  $J = 8.0$  Hz, 2H), 6.50–6.29 (m, 2H), 5.82 (dd,  $J = 17.4, 10.8$  Hz, 1H), 5.10 (dd,  $J = 6.9, 5.9$  Hz, 1H), 4.92 (s, 1H), 4.91 (s, 1H), 4.89 (d,  $J = 2.6$  Hz, 1H), 4.82 (d,  $J = 5.1$  Hz, 2H), 4.60 (s, 1H), 4.46–4.27 (m, 2H), 2.99 (d,  $J = 6.8$  Hz, 2H), 2.07–1.97 (m, 4H), 1.92 (d,  $J = 10.1$  Hz, 1H), 1.86–1.79 (m, 1H), 1.75 (d,  $J = 9.2$  Hz, 1H), 1.71 (s, 3H), 1.68 (s, 3H), 1.61 (s, 3H), 1.56 (d,  $J = 8.1$  Hz, 1H), 1.51–1.44 (m, 3H), 1.31 (dd,  $J = 17.7, 7.5$  Hz, 4H), 1.01 (s, 3H), 0.97 (d,  $J = 6.5$  Hz, 3H).

**$^{13}\text{C}$  NMR** (126 MHz,  $\text{CDCl}_3$ ):  $\delta$  166.6, 152.7, 150.3, 147.7, 142.1, 131.2, 131.5, 130.7, 130.0, 129.0, 126.0, 124.7, 112.3, 110.1, 109.3, 63.5, 52.9, 44.5, 40.0 (d,  $J = 10.8$  Hz), 38.8, 37.1, 35.7, 35.1, 33.4, 29.7, 27.3, 25.8, 25.5, 24.3, 19.6, 17.8, 16.8.

**HRMS** (ESI)  $m/z$  ( $[\text{M}+\text{H}]^+$ ) calcd for  $\text{C}_{34}\text{H}_{49}\text{O}_2$ : 489.3727. Found: 489.3730.

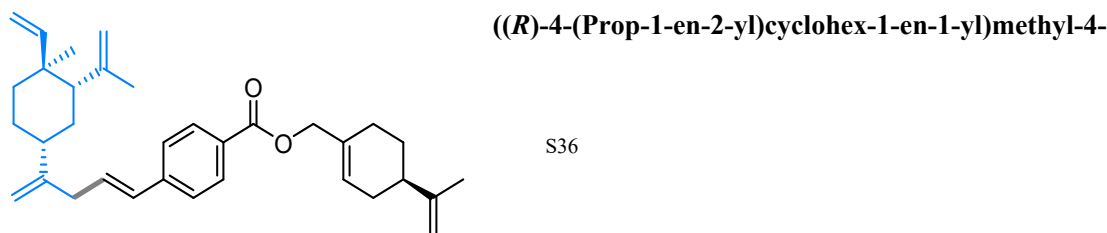

**((E)-4-((1R,3S,4S)-4-methyl-3-(prop-1-en-2-yl)-4-vinylcyclohexyl)penta-1,4-dien-1-yl)benzoate (60).**

The title compound was prepared following the general procedure using (*R*)-4-(prop-1-en-2-yl)cyclohex-1-en-1-yl)methyl (*E*)-4-(2-bromovinyl)benzoate (54.2 mg, 0.150 mmol, 1.0 equiv), 2-((1R,3S,4S)-4-methyl-3-(prop-1-en-2-yl)-4-vinylcyclohexyl)allyl acetate (78.7 mg, 0.300 mmol, 2.0 equiv). After purification by column chromatography (using 5% ethyl acetate in petroleum ether), the title compound was isolated in 82% yield (59.5 mg) as a colorless oil.

**<sup>1</sup>H NMR** (500 MHz, CDCl<sub>3</sub>): δ 7.97 (d, *J* = 8.3 Hz, 2H), 7.40 (d, *J* = 8.3 Hz, 2H), 6.38 (dt, *J* = 15.8, 12.4 Hz, 2H), 5.82–5.80 (m, 2H), 5.00 (s, 1H), 4.91 (s, 1H), 4.88 (d, *J* = 2.1 Hz, 1H), 4.81 (s, 2H), 4.71 (dd, *J* = 8.9, 5.0 Hz, 4H), 4.57 (s, 1H), 2.98 (d, *J* = 6.7 Hz, 2H), 2.17 (d, *J* = 5.1 Hz, 3H), 2.08 (s, 3H), 2.01 (s, 2H), 1.90 (d, *J* = 10.0 Hz, 3H), 1.70–1.69 (m, 3H), 1.59 (s, 2H), 1.46 (d, *J* = 3.4 Hz, 4H), 1.29 (s, 1H), 1.00–0.99 (m, 3H).

**<sup>13</sup>C NMR** (126 MHz, CDCl<sub>3</sub>): δ 170.8, 154.9, 152.6, 150.1, 148.5, 147.4, 142.2, 132.9, 131.7, 130.7, 130.0, 126.0, 125.6, 112.4, 111.0, 110.1, 108.9, 68.8, 66.2, 55.8, 52.8, 48.5, 45.7, 44.4, 41.9, 40.9, 39.9, 38.8, 36.5, 35.0, 33.1, 30.6.

**HRMS** (ESI) *m/z* ([*M*+*H*]<sup>+</sup>) calcd for C<sub>34</sub>H<sub>45</sub>O<sub>2</sub>: 485.3414. Found: 485.3409.

## V. In Vitro Anti-Tumour Activity of Compound 55

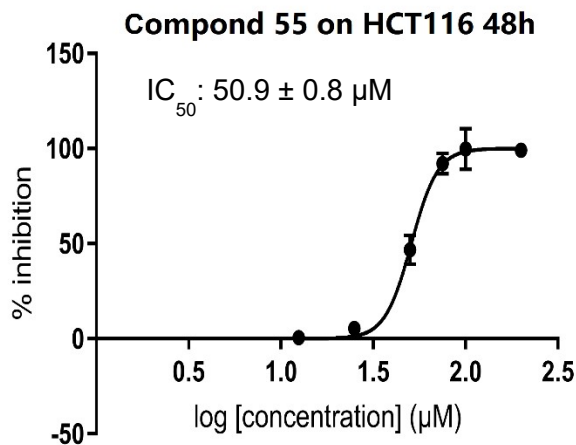

**Figure S1.** IC<sub>50</sub> of Compound 55 on HCT116

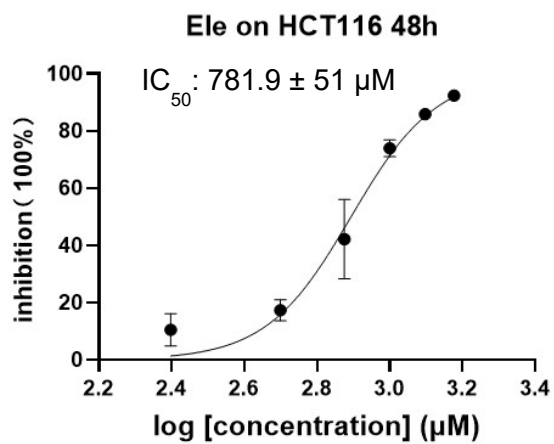

**Figure S2.**  $IC_{50}$  of  $\beta$ -elemene on HCT116

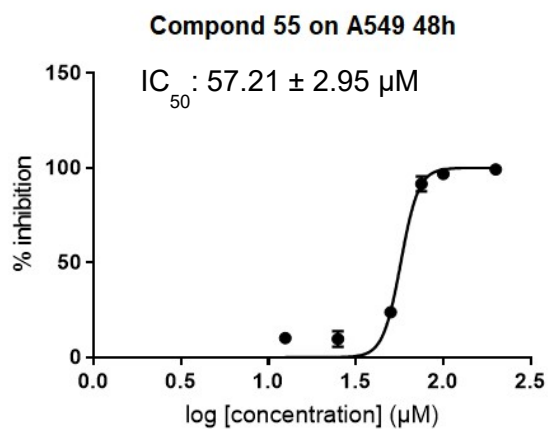

**Figure S3.**  $IC_{50}$  of Compound 55 on A549

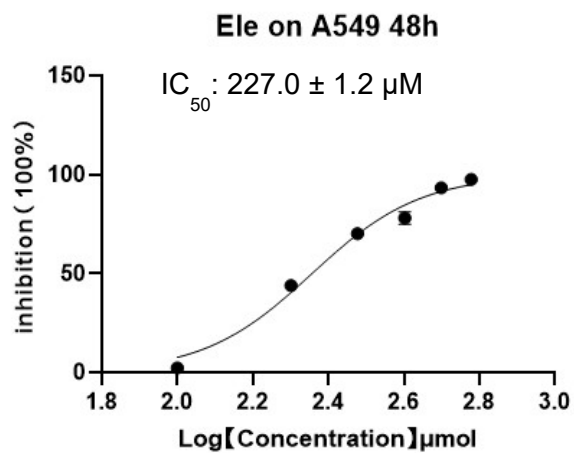

**Figure S4.**  $IC_{50}$  of  $\beta$ -elemene on A549

## VI. Preparation of Alkenyl Bromides

A general procedure for the preparation of vinyl bromides.<sup>14-16</sup>

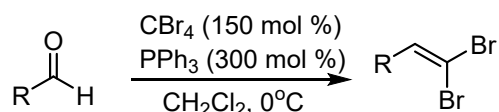

*Step 1:* To a flame-dried flask was added aldehyde (20 mmol, 100 mol%), CBr<sub>4</sub> (30 mmol, 150 mol%), and CH<sub>2</sub>Cl<sub>2</sub> (80 mL). The flask was cooled to 0 °C, at which point a solution of PPh<sub>3</sub> (60 mmol, 300 mol%) in CH<sub>2</sub>Cl<sub>2</sub> (70 mL) was added dropwise via addition funnel over 30 min. The solution was stirred at 0 °C under N<sub>2</sub> for 1 h. About half of the volume of CH<sub>2</sub>Cl<sub>2</sub> was removed under reduced pressure. Pentane (100 mL) was added, and triphenylphosphine oxide (TPPO) precipitated out. After filtration and evaporation of the solvent, the residue was dissolved in pentane (50 mL) which led to further precipitation of TPPO. Filtration and evaporation of the solvent afforded the crude dibromide which was directly used for the next step.

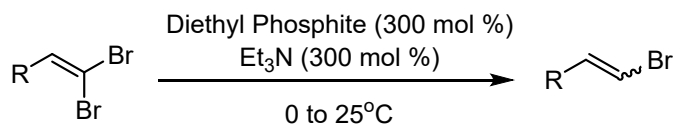

*Step 2:* To a solution of the crude dibromide (~ 20.0 mmol, 100 mol%) and NEt<sub>3</sub> (60 mmol, 300 mol%) in DMF (20 mL) was added dimethyl phosphonate (60.0 mmol, 300 mol%). The solution was stirred over night at room temperature. Water (60 mL) was added to the mixture, which was extracted with pentane (2 × 100 mL). The combined organic phases were washed with an aqueous solution of HCl (1 M, 55 mL) and dried over Na<sub>2</sub>SO<sub>4</sub>, filtered, and concentrated. The crude material was purified by flash chromatography.

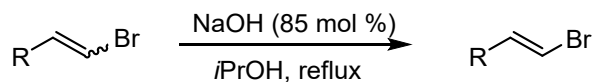

*Step 3:* The crude product (~20.0 mmol, 100 mol%) from the previous step was dissolved in *i*PrOH

(30 mL). Solid NaOH (17.0 mmol, 85 mol%) was added and the mixture was heated to reflux for 1.5 hours. The reaction mixture was cooled to room temperature, diluted with pentane (100 mL), and partitioned with distilled H<sub>2</sub>O (2 × 100 mL). The organic phase was collected, and washed with an aqueous solution of HCl (1 M, 75 mL), dried over Na<sub>2</sub>SO<sub>4</sub>. The solvent was removed under reduced pressure. The crude material was purified by flash chromatography.

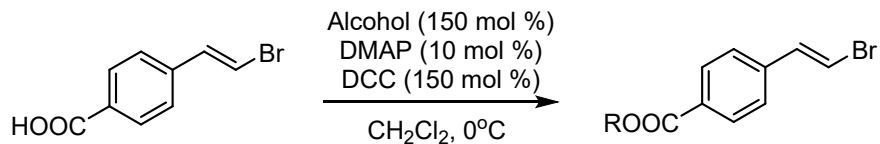

*Step 4:* To a flame-dried flask was added acid (10 mmol, 100 mol%), DMAP (1 mmol, 10 mol%), DCC (15 mmol, 150 mol%), and CH<sub>2</sub>Cl<sub>2</sub> (30 mL). The flask was cooled to 0 °C, at which point a solution of alcohol (15 mmol, 150 mol%) in CH<sub>2</sub>Cl<sub>2</sub> (30 mL) was added dropwise via addition funnel over 30 min. The solution was stirred at 0 °C under N<sub>2</sub> over night. After the reaction was finished the CH<sub>2</sub>Cl<sub>2</sub> was removed under reduced pressure. And The crude residue was purified by silicagel chromatography (hexanes) to give the target compound.

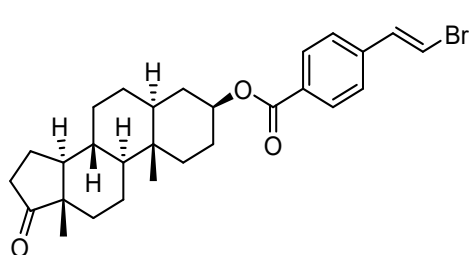

**(3S,5S,8R,9S,10S,13S,14S)-10,13-Dimethyl-17-oxohexadecahydro-1H-cyclopenta[a]phenanthren-3-yl 4-((E)-2-bromovinyl)benzoate.**

The title compound was prepared following the general procedure using (*E*)-4-(2-bromovinyl)benzoic acid (2.3 g, 10 mmol, 1.0 equiv), epiandrosterone (4.4 g, 15 mmol, 1.5 equiv). After purification by column chromatography (using 5% ethyl acetate in petroleum ether), the title compound was isolated in 80% yield (4.0 g) as a white solid.

**<sup>1</sup>H NMR** (500 MHz, CDCl<sub>3</sub>): δ 8.02–7.92 (m, 1H), 7.33 (t, *J* = 5.8 Hz, 1H), 7.18–7.08 (m, 1H), 6.97–6.83 (m, 1H), 5.01–4.83 (m, 1H), 2.48–2.38 (m, 1H), 2.14–2.01 (m, 1H), 1.93 (ddd, *J* = 15.1, 10.4, 6.2 Hz, 1H), 1.82–1.72 (m, 1H), 1.69–1.62 (m, 1H), 1.58–1.46 (m, 1H), 1.36–1.24 (m, 1H), 1.10 (dq, *J* = 13.9, 3.9



Hz, 1H), 0.99 (ddd,  $J = 19.4, 9.7, 4.9$  Hz, 1H), 0.91–0.84 (m, 1H), 0.72 (d,  $J = 4.1$  Hz, 1H).

**$^{13}\text{C}$  NMR** (126 MHz,  $\text{CDCl}_3$ ):  $\delta$  165.7, 140.0, 136.5, 132.1, 130.2, 129.5, 126.0, 109.4, 74.4, 54.4, 51.5, 47.9, 44.8, 36.9, 36.0, 35.8, 35.2, 34.2, 31.7, 30.9, 28.4, 27.6, 21.9, 20.6, 13.9, 12.4.

**HRMS** (ESI)  $m/z$  ( $[\text{M}+\text{H}]^+$ ) calcd for  $\text{C}_{28}\text{H}_{36}\text{BrO}_3$ : 499.1842. Found: 499.1843.

**M.p.**: 240–241 °C.

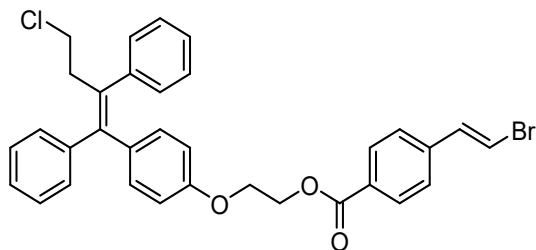

**2-(4-((Z)-4-Chloro-1,2-diphenylbut-1-en-1-yl)phenoxy)ethyl 4-((E)-2-bromovinyl)benzoate.**

The title compound was prepared following the general procedure using (*E*)-4-(2-bromovinyl)benzoic acid (2.3 g, 10 mmol, 1.0 equiv), ospemifene (5.7 g, 15 mmol, 1.5 equiv). After purification by column chromatography (using 5% ethyl acetate in petroleum ether), the title compound was isolated in 79% yield (4.6 g) as a white solid.

**$^1\text{H}$  NMR** (500 MHz,  $\text{CDCl}_3$ ):  $\delta$  7.98 (d,  $J = 8.3$  Hz, 2H), 7.40–7.35 (m, 2H), 7.33 (d,  $J = 8.3$  Hz, 2H), 7.30 (t,  $J = 6.7$  Hz, 3H), 7.23–7.18 (m, 2H), 7.14 (dd,  $J = 13.3, 6.1$  Hz, 4H), 6.92 (d,  $J = 14.0$  Hz, 1H), 6.81 (d,  $J = 8.8$  Hz, 2H), 6.60 (d,  $J = 8.7$  Hz, 2H), 4.64–4.51 (m, 2H), 4.23–4.13 (m, 2H), 3.42 (t,  $J = 7.4$  Hz, 2H), 2.93 (t,  $J = 7.4$  Hz, 2H).

**$^{13}\text{C}$  NMR** (126 MHz,  $\text{CDCl}_3$ ):  $\delta$  166.2, 156.9, 143.0, 141.8, 141.1, 140.4, 136.5, 135.52, 135.49, 132.2, 131.9, 130.4, 129.7, 129.5, 128.5, 128.4, 127.1, 126.8, 126.1, 113.7, 109.7, 65.8, 63.6, 43.0, 38.7.

**HRMS** (ESI)  $m/z$  ( $[\text{M}+\text{K}]^+$ ) calcd for  $\text{C}_{33}\text{H}_{28}\text{BrClKO}_3$ : 625.0542. Found: 625.0544.

**M.p.**: 165–166 °C.

## VII. Preparation of $\beta$ -Elemene Derived-Acetate 1c:

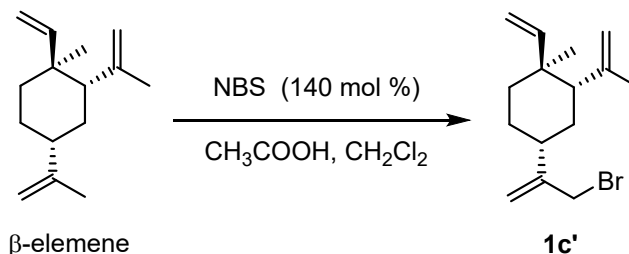

*Step 1:* To a flame-dried flask was added  $\beta$ -elemene (10.0 mmol, 100 mol%), NBS (14.0 mmol, 140 mol%),  $\text{CH}_3\text{COOH}$  (30 mL), and  $\text{CH}_2\text{Cl}_2$  (10 mL). The solution was stirred at 25 °C under air for 3 h. After the reaction was completed, water (60 mL) was then added to the mixture and extracted with pentane ( $2 \times 100$  mL). The combined organic phases were collected and dried over  $\text{Na}_2\text{SO}_4$ , filtered, and concentrated. After purification by column chromatography (only using petroleum ether), the title compound **1c'** was isolated in 28% yield (0.8 g) as a colorless oil.

**$^1\text{H NMR}$**  (400 MHz,  $\text{CDCl}_3$ ):  $\delta$  5.82 (dd,  $J = 17.8, 10.5$  Hz, 1H), 5.20 (s, 1H), 5.04 (s, 1H), 4.93 (dd,  $J = 5.2, 1.3$  Hz, 1H), 4.90 (d,  $J = 1.4$  Hz, 1H), 4.87–4.82 (m, 1H), 4.59 (s, 1H), 4.03 (s, 2H), 2.26 (ddd,  $J = 15.0, 8.1, 3.8$  Hz, 1H), 2.05 (dd,  $J = 12.6, 3.4$  Hz, 1H), 1.72 (s, 3H), 1.68–1.57 (m, 2H), 1.56–1.40 (m, 4H), 1.01 (s, 3H).

**$^{13}\text{C NMR}$**  (101 MHz,  $\text{CDCl}_3$ ):  $\delta$  149.6, 149.0, 147.5, 116.4, 113.5, 111.6, 51.1, 47.8, 47.5, 41.0, 39.8, 39.7, 33.8, 27.0, 15.8.

**HRMS** (ESI)  $m/z$  ( $[\text{M}+\text{Na}]^+$ ) calcd for  $\text{C}_{15}\text{H}_{23}\text{BrNa}$ : 305.0875. Found: 305.0876.

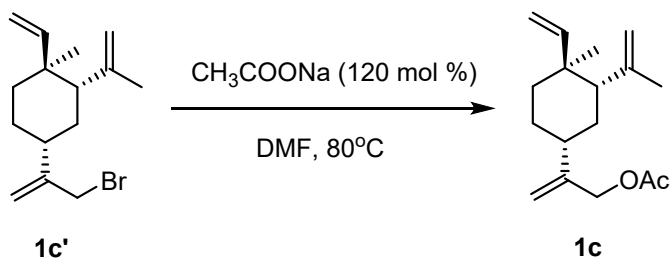

*Step 2:* To a flame-dried flask was added the compound **1c'** (10.0 mmol, 100 mol%) and  $\text{CH}_3\text{COONa}$  (12.0 mmol, 120 mol%) in DMF (20 mL), which was stirred at 80 °C over night. Then water (60 mL) was added to the mixture, which was extracted with pentane ( $2 \times 100$  mL). The combined organic phases were collected and dried over  $\text{Na}_2\text{SO}_4$ , filtered, and concentrated. After purification by column

chromatography (only using petroleum ether), the title compound **1c** was isolated in 67% yield (1.7 g) as a colorless oil.

**<sup>1</sup>H NMR** (500 MHz, CDCl<sub>3</sub>): δ 5.86–5.77 (m, 1H), 5.08–4.98 (m, 2H), 4.92 (dd, *J* = 6.2, 1.3 Hz, 1H), 4.89 (s, 1H), 4.85–4.80 (m, 1H), 4.58 (s, 3H), 2.09 (s, 3H), 2.08–1.99 (m, 2H), 1.70 (d, *J* = 0.4 Hz, 3H), 1.65 (ddd, *J* = 9.3, 8.4, 5.2 Hz, 1H), 1.60–1.33 (m, 5H), 1.00 (s, 3H).

**<sup>13</sup>C NMR** (126 MHz, CDCl<sub>3</sub>): δ 170.9, 150.2, 148.6, 147.5, 112.4, 111.1, 110.2, 66.3, 52.8, 42.0, 39.95, 39.89, 33.2, 27.2, 24.9, 21.2, 16.7.

**HRMS** (ESI) *m/z* ([M+Na]<sup>+</sup>) calcd for C<sub>17</sub>H<sub>26</sub>NaO<sub>2</sub>: 285.1825. Found: 285.1850.

## VIII. Mechanistic Investigations

### 1. Organozinc Experiment

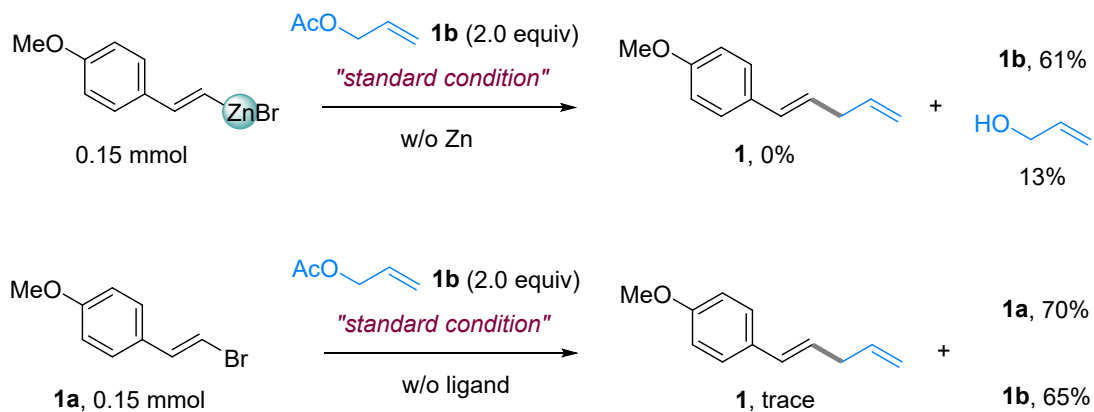

Figure S5. Organozinc experiment. (Yields determined by GC-MS)

## 2. Control Experiments

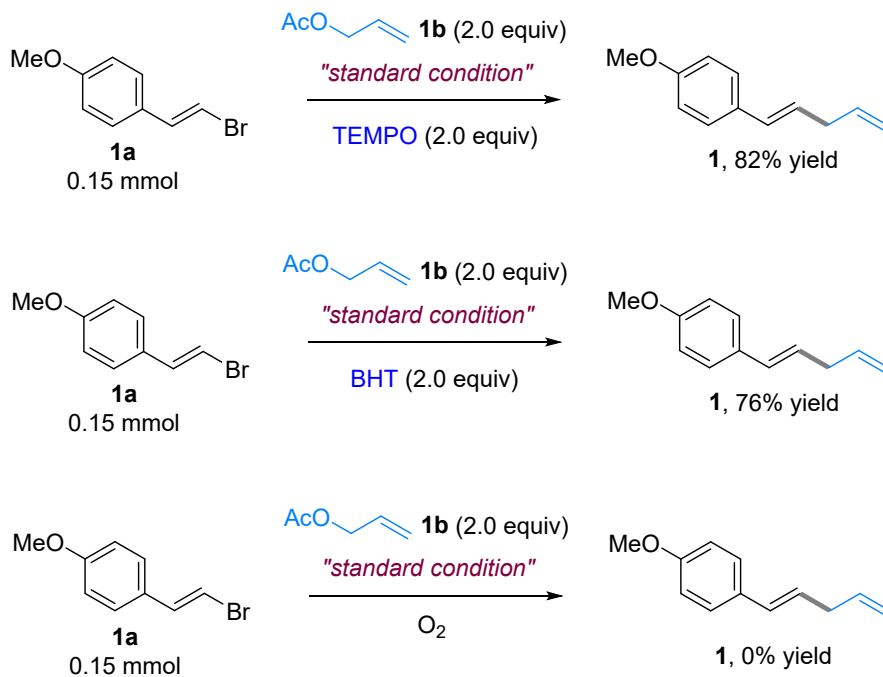

Figure S6. Control experiments.

## IX. References

- [1] Ye, Y.; Liu, J.; Xu, B.; Jiang, S.; Bai, R.; Li, S.; Xie, T.; Ye, X.-Y. *Chem. Sci.* **2021**, *12*, 13209.
- [2] Yang, B.; Wang, Z.-X. *J. Org. Chem.* **2017**, *82*, 4542.
- [3] Gumrukcu, Y.; de Bruin, B.; Reek, J. N. H. *Chem. Eur. J.* **2014**, *20*, 10905.
- [4] Frye, E. C.; O'Connor, C. J.; Twigg, D. G.; Elbert, B.; Laraia, L.; Hulcoop, D. G.; Venkitaraman, A. R.; Spring, D. R. *Chem. Eur. J.* **2012**, *18*, 8774.
- [5] Li, Y.; Luo, Y.; Peng, L.; Li, Y.; Zhao, B.; Wang, W.; Pang, H.; Deng, Y.; Bai, R.; Lan, Y.; Yin, G. *Nat. Commun.* **2020**, *11*, 417.
- [6] Kabalka, G. W.; Dadusha, E.; Al-Masum, M. *Tetrahedron Lett.* **2006**, *47*, 7459.

- [7] Mailig, M.; Hazra, A.; Armstrong, M. K.; Lalic, G. *J. Am. Chem. Soc.* **2017**, *139*, 6969.
- [8] Dey, R.; Chattopadhyay, K.; Ranu, B. C. *J. Org. Chem.* **2008**, *73*, 9461.
- [9] Nguyen, B. H.; Perkins, R. J.; Smith, J. A.; Moeller, K. D. *J. Org. Chem.* **2015**, *80*, 11953.
- [10] Takeda, T.; Matsumura, R.; Wasa, H.; Tsubouchi, A. *Asian J. Org. Chem.* **2014**, *3*, 838.
- [11] Rimkus, A. M.; Alt, H. G. *Polyhedron* **2017**, *126*, 72.
- [12] Matsubara, R.; Jamison, T. F. *Chem. Asian J.* **2011**, *6*, 1860.
- [13] Song, F.; Wang, F.; Guo, L.; Feng, X.; Zhang, Y.; Chu, L. *Angew. Chem. Int. Ed.* **2020**, *59*, 177.
- [14] Ramirez, F.; Desai, N. B.; Kelvie, N. *J. Am. Chem. Soc.* **1962**, *84*, 1745.
- [15] Abbas, S.; Hayes, C. J.; Worden, S. *Tetrahedron Lett.* **2000**, *41*, 3215.
- [16] Dolby, L. J.; Wilkins, D. C.; Frey, T. G. *J. Org. Chem.* **1966**, *31*, 1110.

## X. Spectral Data (NMR Spectrum and HPLC Trace)

YE-17-0

PROTON CDCl3 E:\CCY 34

7.29  
7.28  
7.26  
6.85  
6.83  
6.37  
6.34  
6.10  
6.07  
5.12  
5.12  
5.09  
5.08  
5.06  
5.06  
5.04  
3.80  
2.96  
2.95  
2.95  
2.94  
2.94  
2.93  
2.93

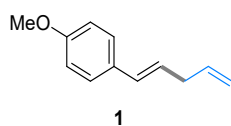<sup>1</sup>H NMR (500 MHz, CDCl<sub>3</sub>)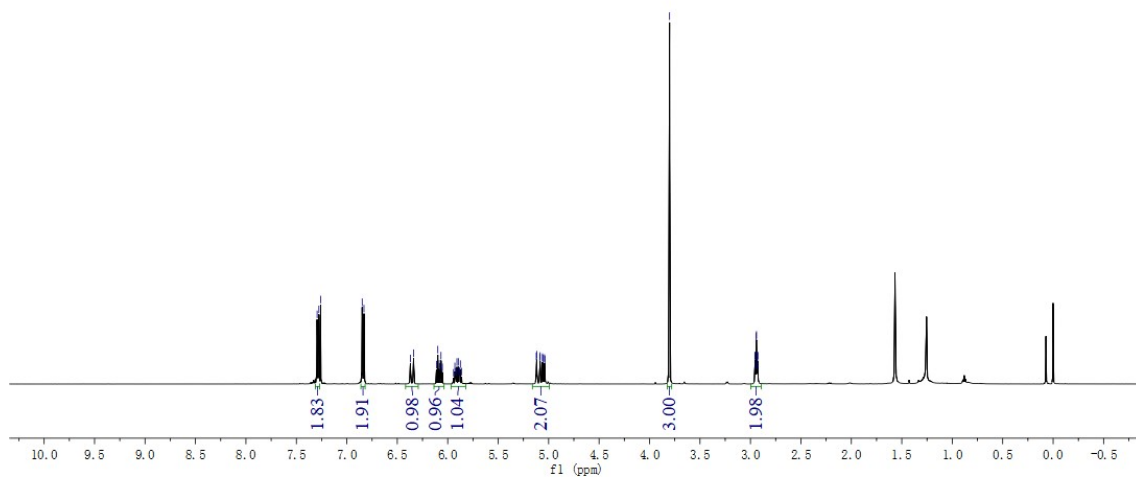

YE-17-0

C13CPD CDCl3 E:\CCY 48

158.93  
136.92  
130.61  
130.34  
127.27  
126.15  
115.60  
114.06  
55.43  
37.15

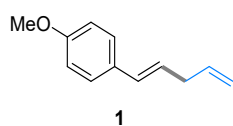<sup>13</sup>C NMR (126 MHz, CDCl<sub>3</sub>)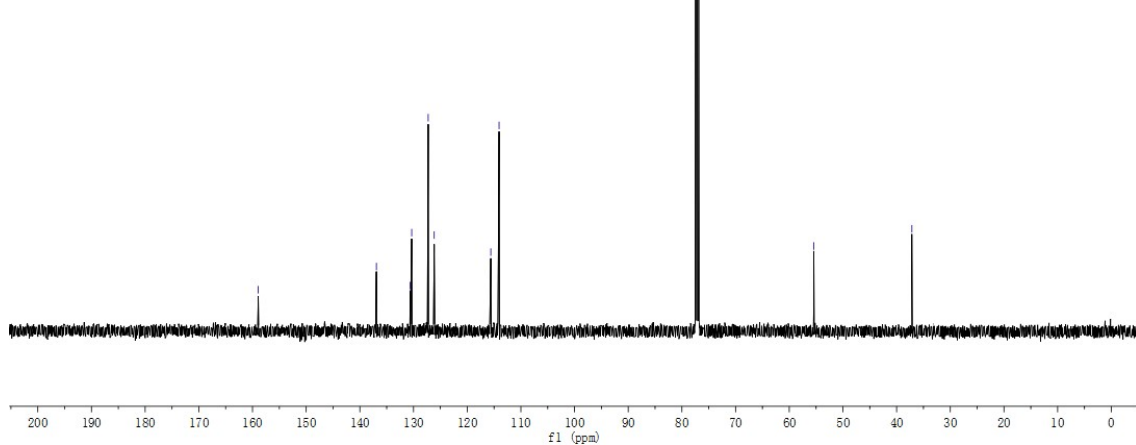

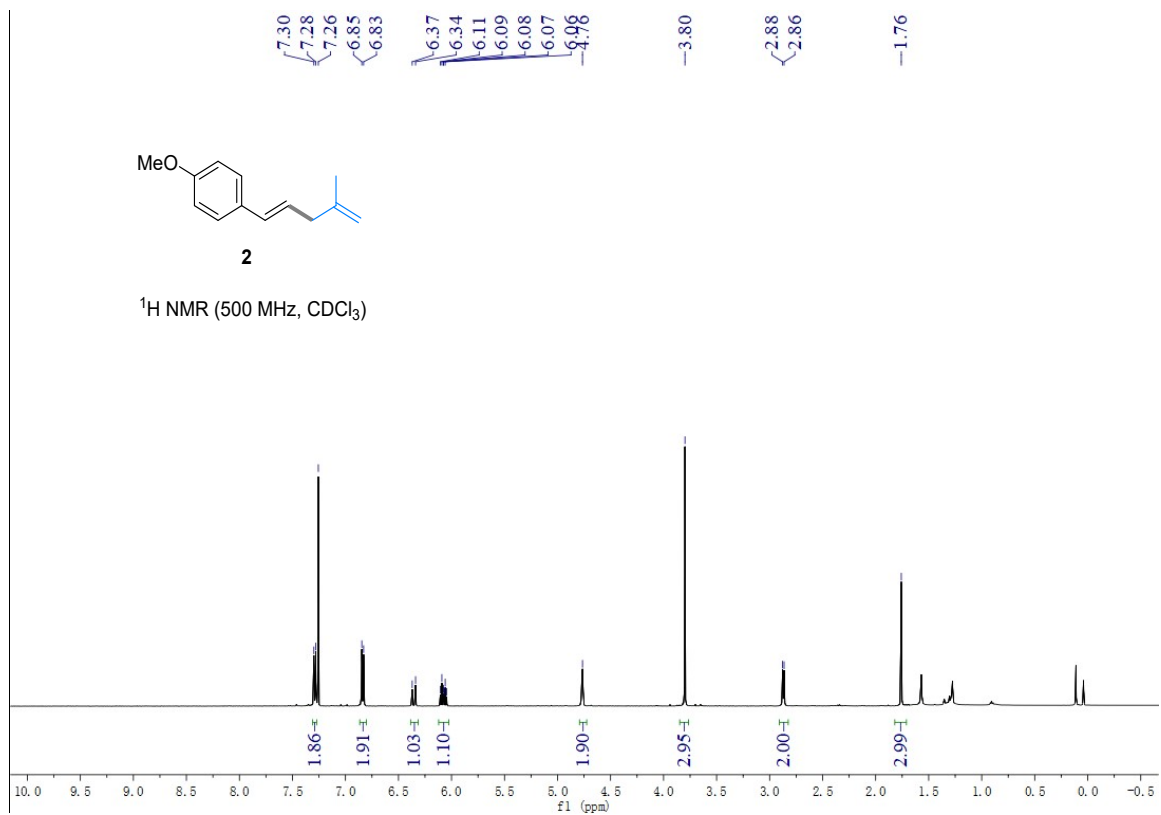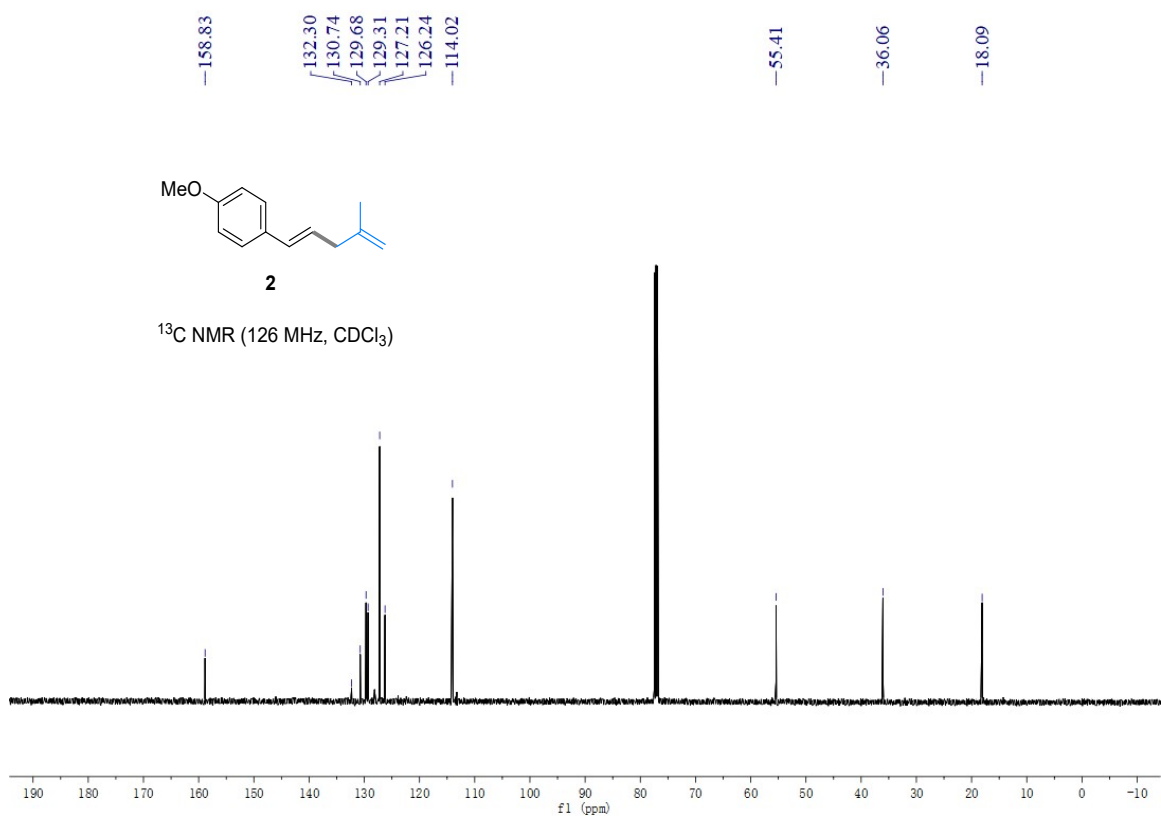

YE-17-6

PROTON CDCl3 E:\ \ CCY 47

7.29  
7.28  
7.26  
6.85  
6.83  
6.32  
6.10  
5.91  
5.50  
5.50  
5.49  
5.49  
5.48

-3.80  
2.89  
2.89  
2.88  
2.88  
2.87  
2.01  
2.00  
2.00  
1.41  
0.93  
0.91  
0.90

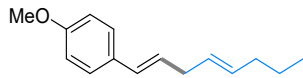**3** $^1\text{H}$  NMR (500 MHz,  $\text{CDCl}_3$ )

YE-17-6

PROTON CDCl3  
1.44  
1.42  
1.41  
1.39  
1.38  
1.36  
0.93  
0.91  
0.90

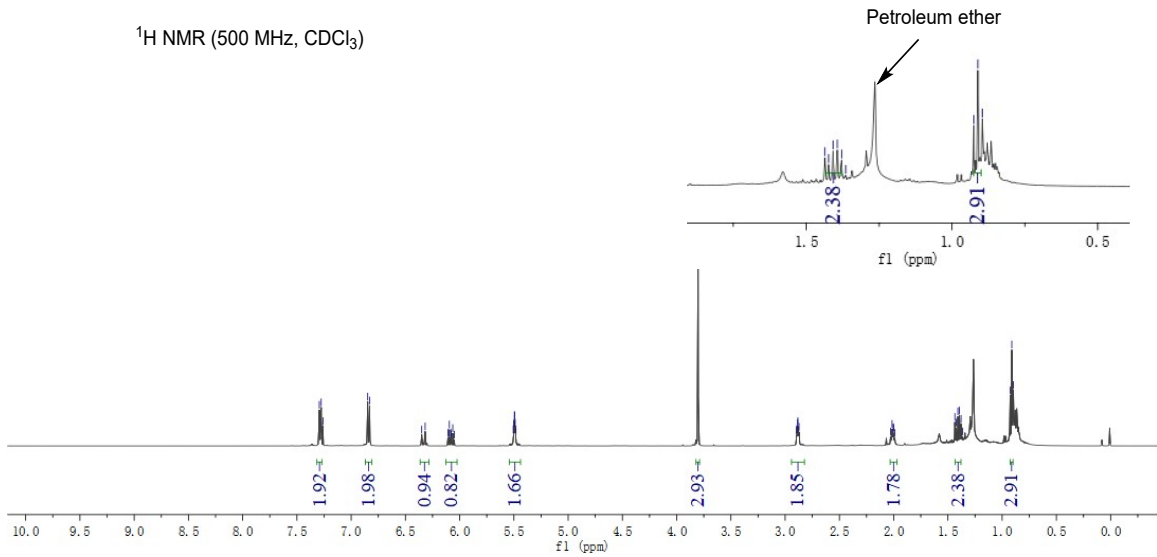

YE-17-6

C13CPD CDCl3 E:\ \ CCY 50

-158.84  
131.74  
130.78  
129.66  
128.19  
127.35  
127.22  
114.03

-55.41  
36.09  
34.86  
29.85  
22.77

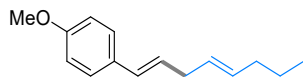**3** $^{13}\text{C}$  NMR (126 MHz,  $\text{CDCl}_3$ )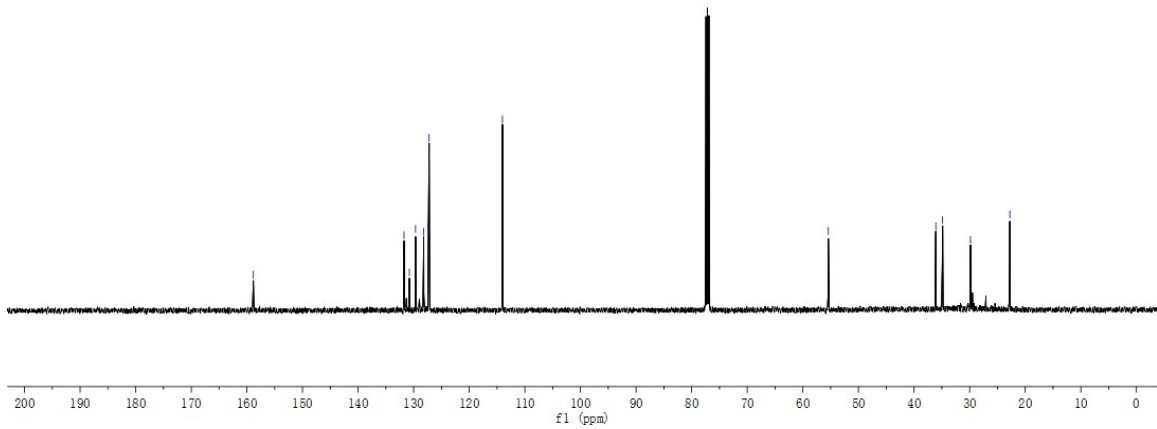



YE-17-172  
 PROTON CDCl<sub>3</sub> E:\CCY 6

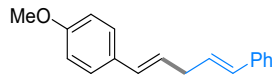

4

<sup>1</sup>H NMR (500 MHz, CDCl<sub>3</sub>)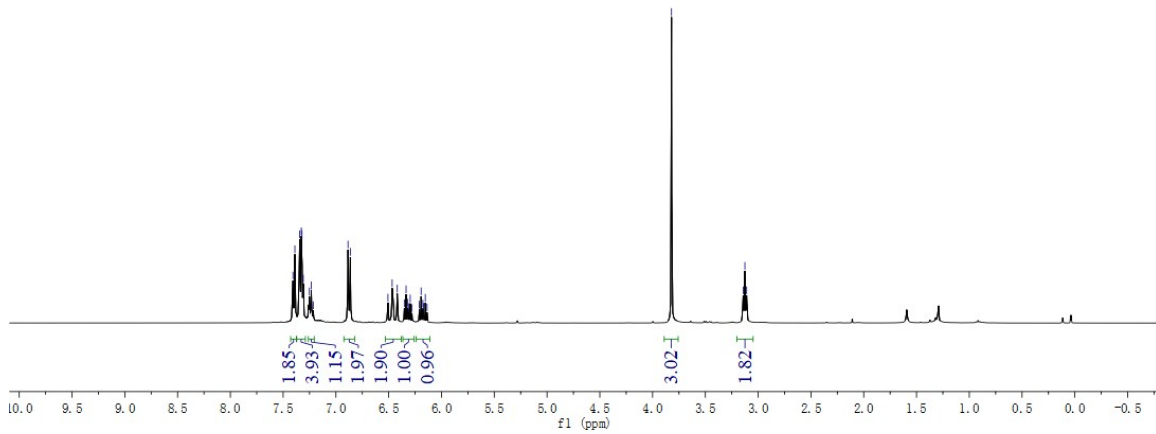

YE-17-52  
 C13CPD CDCl<sub>3</sub> E:\CCY 6

158.98, 130.97, 130.54, 130.53, 128.66, 128.65, 127.31, 127.18, 126.20, 126.13, 124.08, 55.42, 36.33

YE-17-52

C13CPD CDCl<sub>3</sub> E:\CCY 6

130.97, 130.54, 130.53, 128.66, 128.65, 127.31, 127.18, 126.20, 126.13

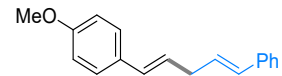

4

<sup>13</sup>C NMR (126 MHz, CDCl<sub>3</sub>)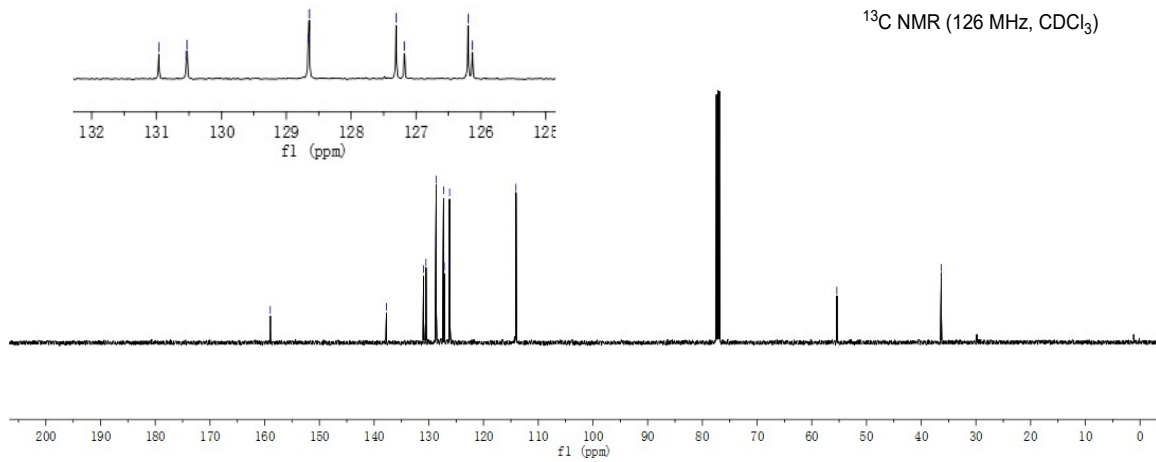

YE-17-32-2  
 PROTON CDCl3 E:\ \ CCY 28

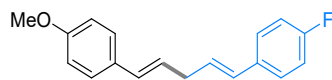

5

 $^1\text{H}$  NMR (500 MHz,  $\text{CDCl}_3$ )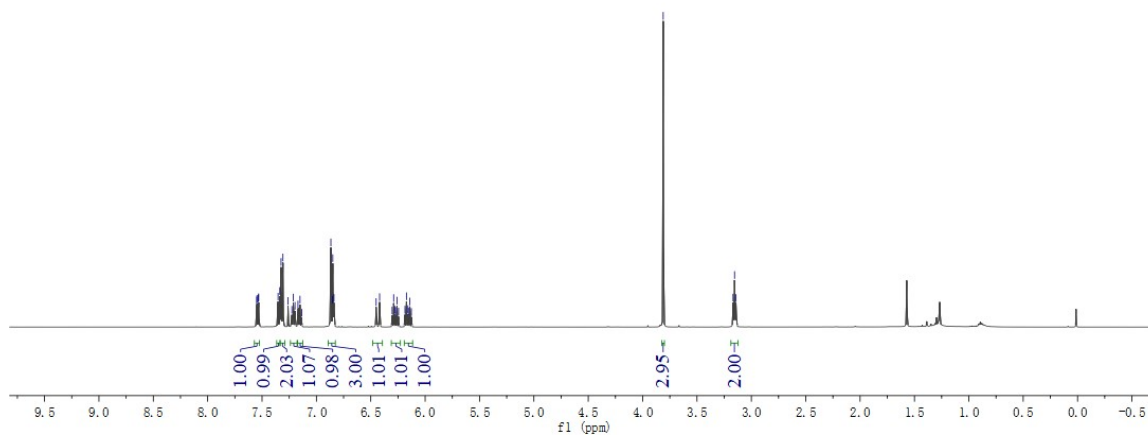

YE-17-32-2  
 C13CPD CDCl3 E:\ \ CCY 28

163.11  
 161.15  
 159.01  
 130.61  
 129.76  
 128.42  
 128.41  
 127.64  
 127.58  
 127.30  
 115.56  
 113.39  
 114.08

-55.39

-36.25

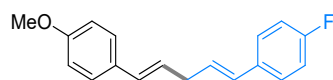

5

 $^{13}\text{C}$  NMR (126 MHz,  $\text{CDCl}_3$ )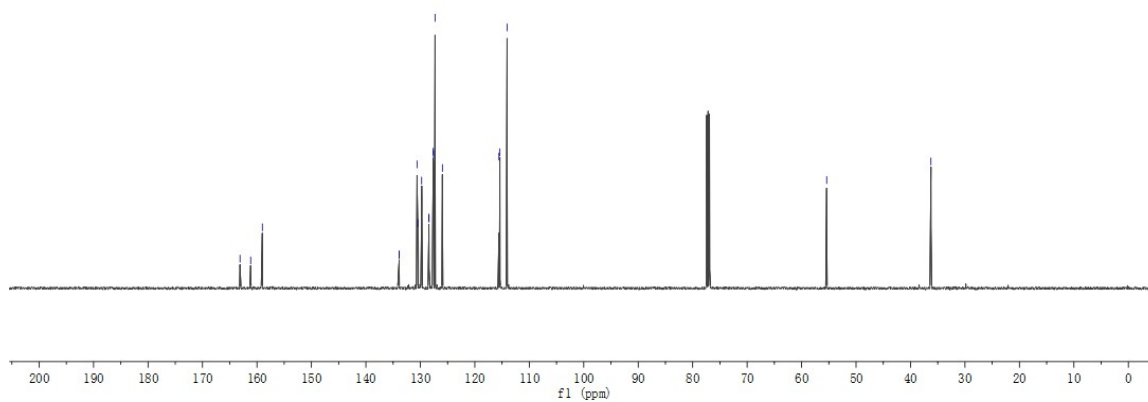

YE-17-33-2  
 PROTON CDCl<sub>3</sub> E:\CCY 29

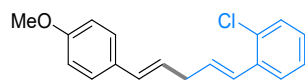

6

<sup>1</sup>H NMR (500 MHz, CDCl<sub>3</sub>)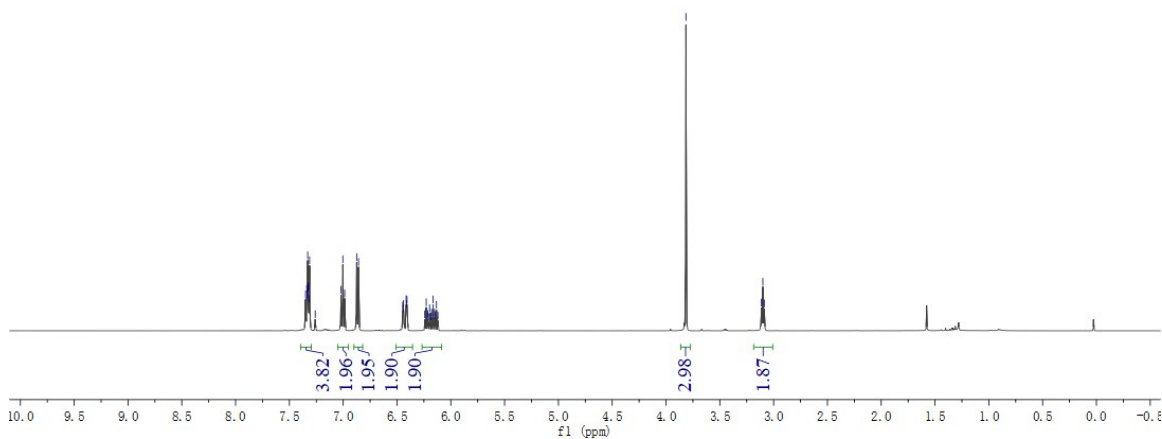

YE-17-33-2  
 C13CPD CDCl<sub>3</sub> E:\CCY 29

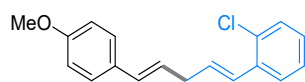

6

<sup>13</sup>C NMR (126 MHz, CDCl<sub>3</sub>)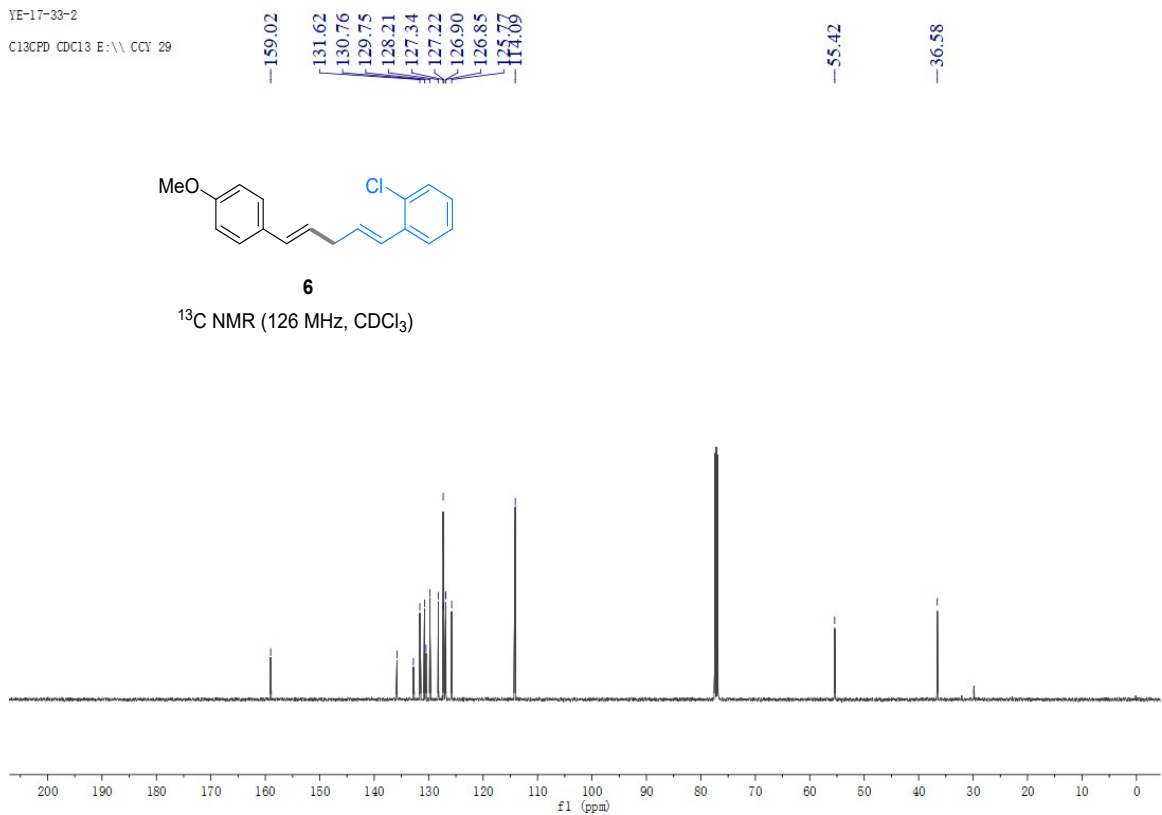

YE-17-18-1  
 PROTON CDCl3 {D:\20210809}

7.34  
 7.32  
 7.31  
 7.30  
 7.27  
 7.26  
 7.25  
 7.21  
 7.19  
 7.17  
 6.87  
 6.85  
 6.44  
 6.41  
 6.35  
 6.19  
 6.17  
 6.15  
 6.13  
 6.11

-3.81

3.05  
 3.03

-1.90

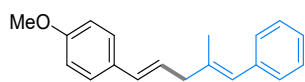

7

<sup>1</sup>H NMR (500 MHz, CDCl<sub>3</sub>)

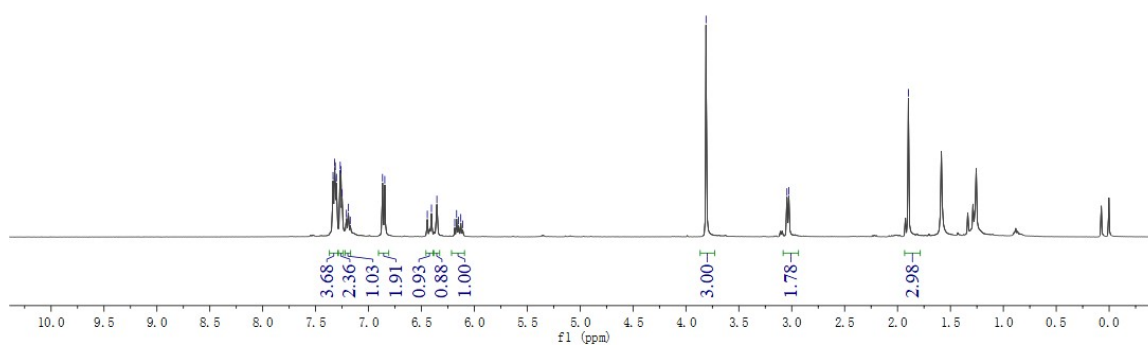

YE-17-18-1

C13CPD CDCl3 E:\ \ CCY 14

159.00  
 138.59  
 137.88  
 131.16  
 130.60  
 128.97  
 128.18  
 127.35  
 126.18  
 126.12  
 125.91  
 114.11

-55.45

-44.22

-18.16

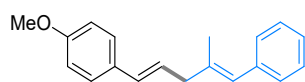

7

<sup>13</sup>C NMR (126 MHz, CDCl<sub>3</sub>)

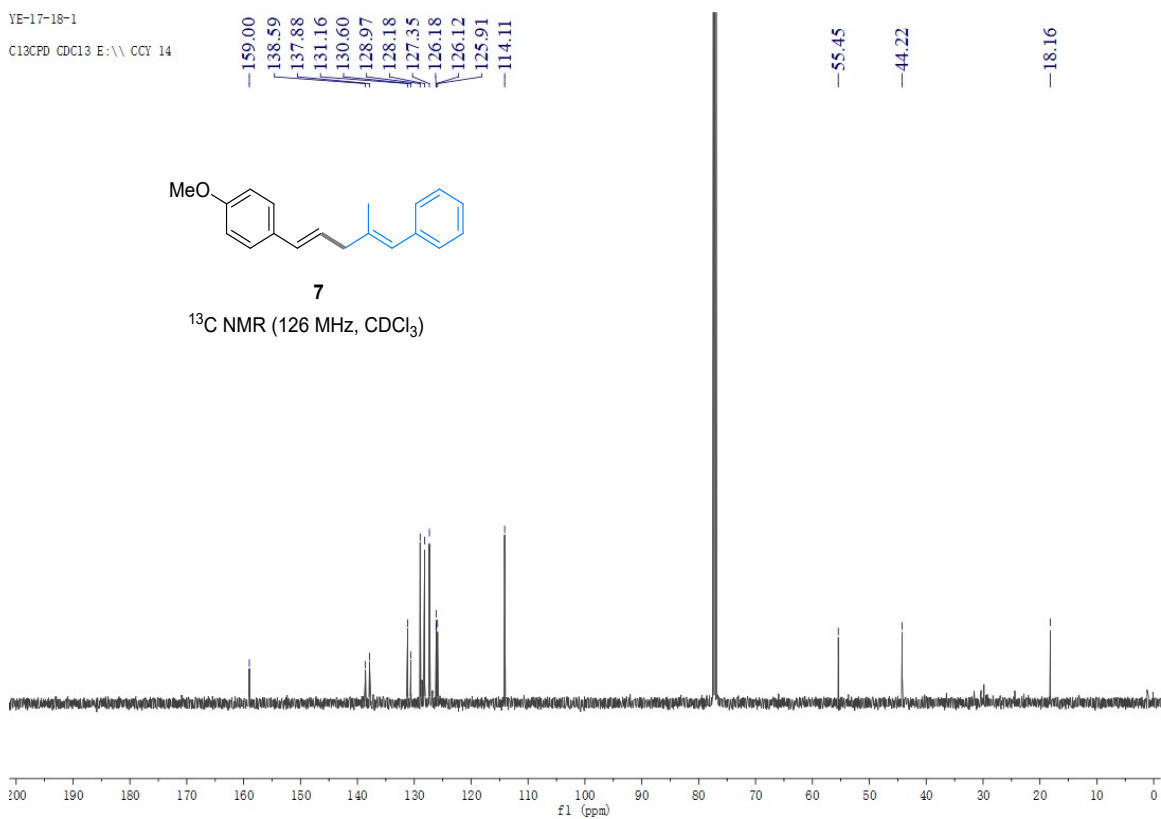

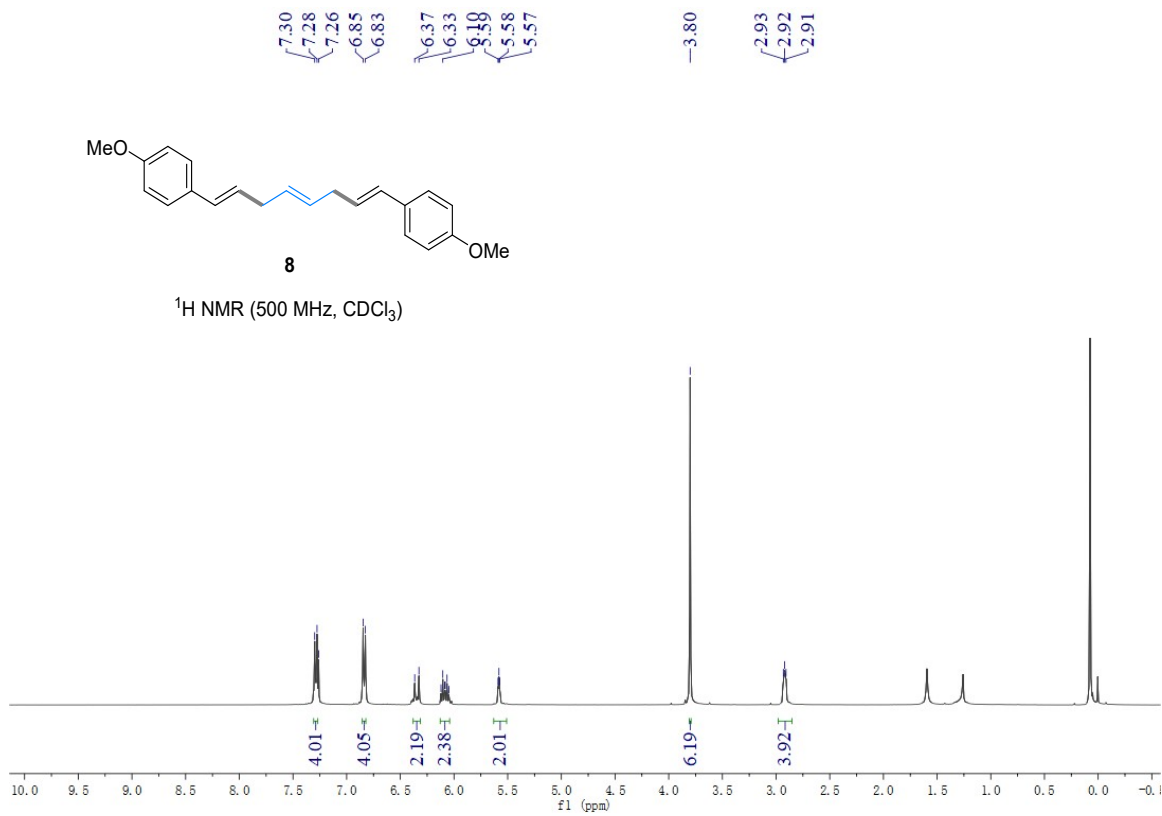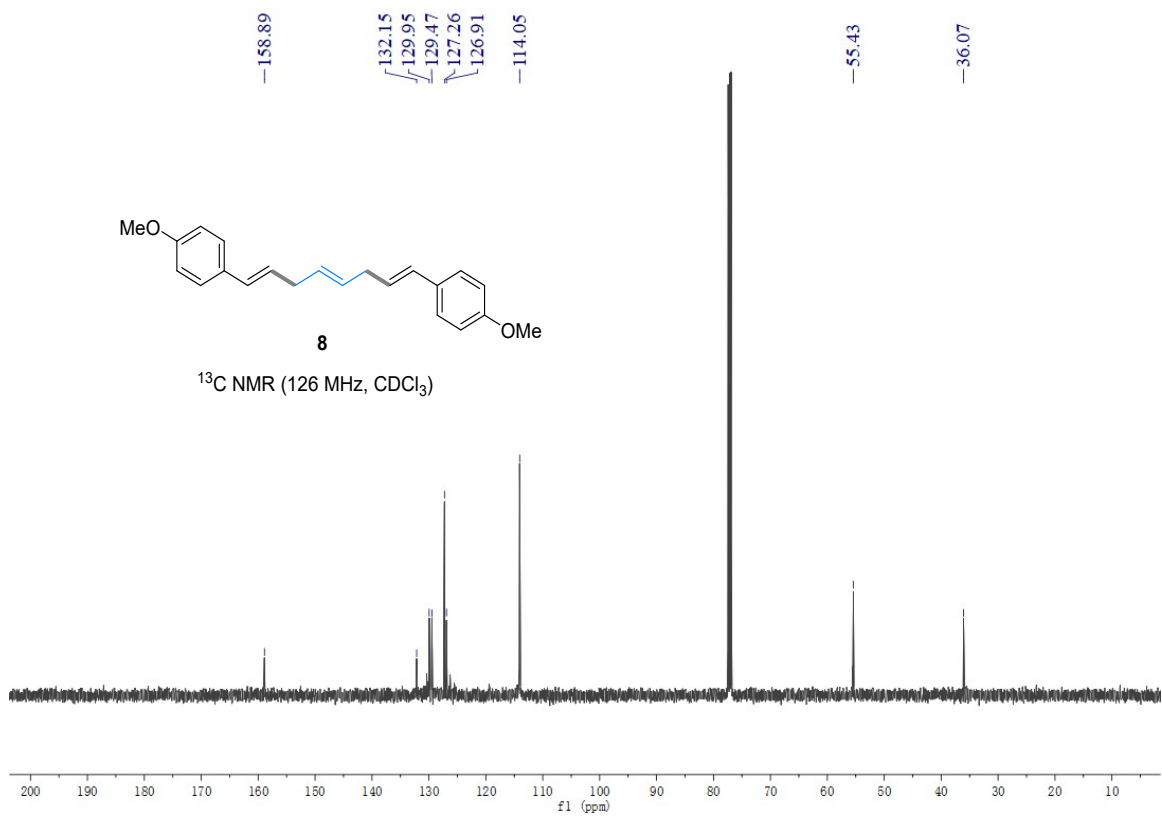

YE-17-11-2  
 PROTON CDCl<sub>3</sub> 7.40 7.39 7.34 7.32 7.30 7.26 7.24 7.22 7.21 6.87 6.86 6.46 6.43 6.41 6.38 6.29 6.27 6.25 6.24 6.14 6.13 6.11 6.10 -3.82 3.24 3.23 3.21 3.20 3.19 3.17 1.32 1.30

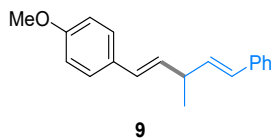

<sup>1</sup>H NMR (500 MHz, CDCl<sub>3</sub>)

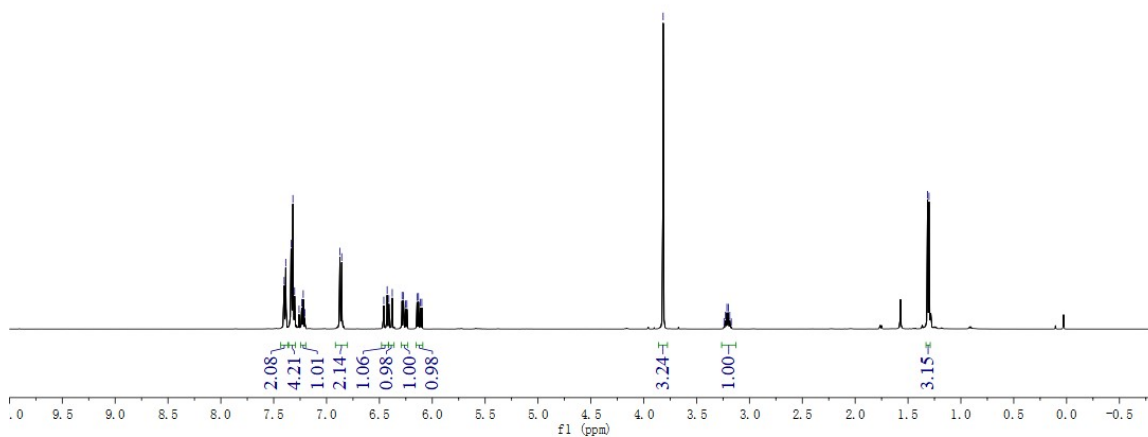

YE-17-11-2  
 C13CPD CDCl<sub>3</sub> E:\ \ CCY 7

158.96 134.67 132.25 130.56 128.77 128.63 128.32 127.34 127.15 124.07 55.41 40.14 20.48

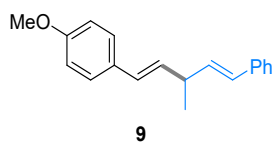

<sup>13</sup>C NMR (126 MHz, CDCl<sub>3</sub>)

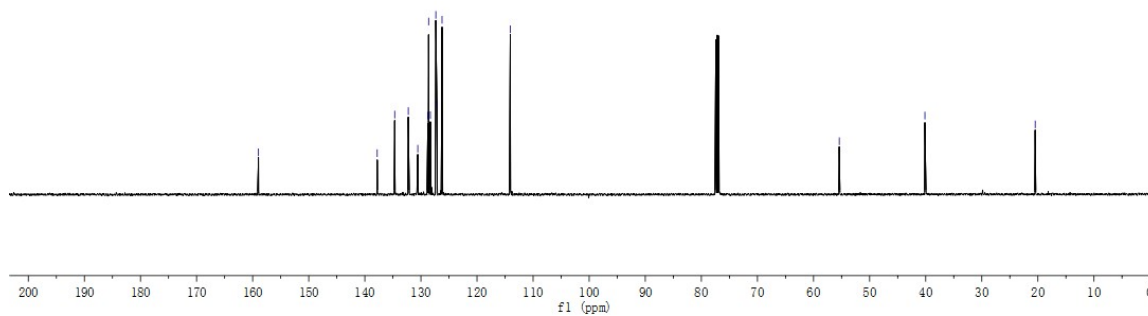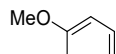

YE-17-2

PROTON CDCl3 E:\ \ CCY 36

7.29  
7.27  
7.26  
6.84  
6.83  
6.83  
6.31  
6.09  
5.99  
5.52  
5.52  
5.51  
5.51  
5.50  
-3.80  
2.88  
2.87  
2.87  
2.87  
2.86  
2.86  
1.71  
1.70  
1.69  
1.69

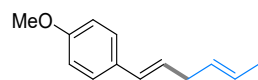**11** $^1\text{H}$  NMR (500 MHz,  $\text{CDCl}_3$ )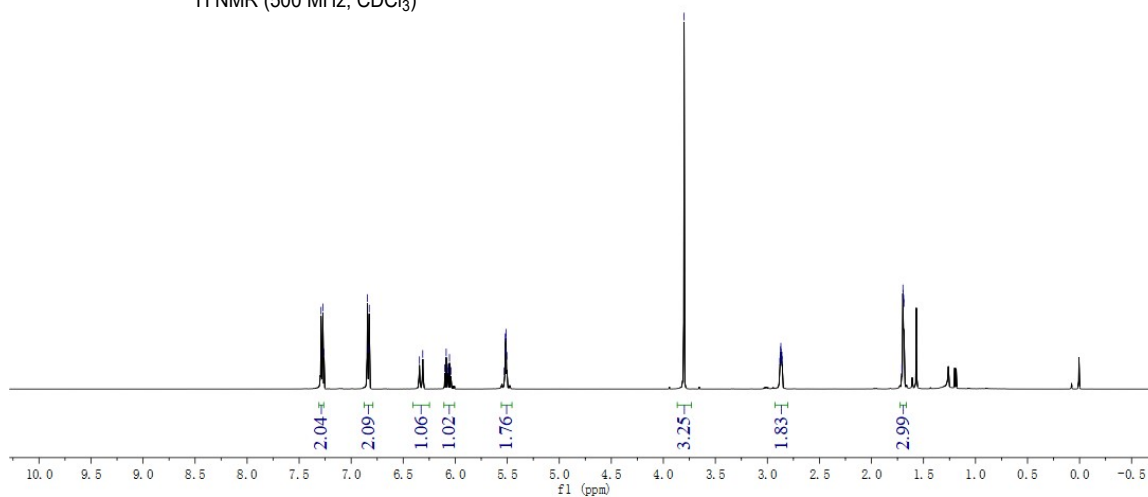

158.84  
132.31  
130.74  
129.69  
129.31  
127.22  
126.25  
114.03  
55.41  
36.06  
18.09

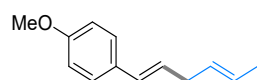**11** $^{13}\text{C}$  NMR (126 MHz,  $\text{CDCl}_3$ )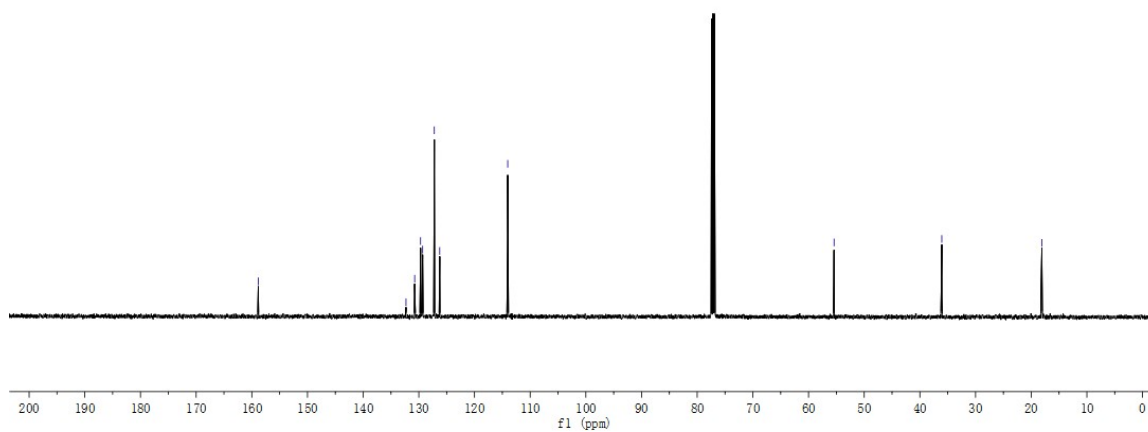

YE-17-26  
 PROTON CDCl<sub>3</sub>

7.79, 7.77, 7.73, 7.35, 6.84, 6.82, 6.82, 6.35, 6.31, 6.11, 6.09, 6.08, 6.07, 6.06, 6.04, 5.59, 5.57, 5.56, 5.55, 5.53, 5.52, 5.51, 5.49, 5.48, 5.47, 5.45, 5.44, 3.80, 2.89, 2.88, 2.86, 2.06, 2.04, 2.03, 1.01, 0.99, 0.97

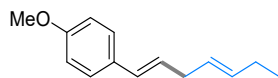

**12**

<sup>1</sup>H NMR (500 MHz, CDCl<sub>3</sub>)

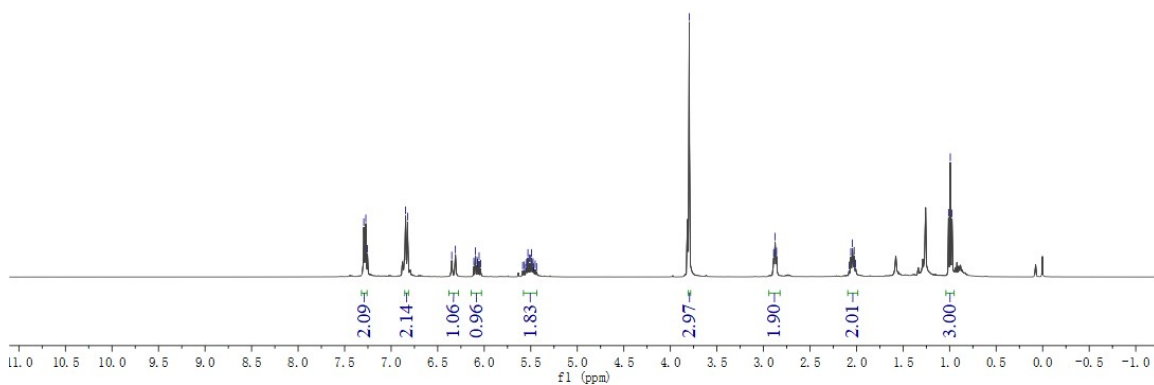

YE-17-26  
 C13CPD CDCl<sub>3</sub> E:\ \ CCY 17

158.85, 133.44, 130.78, 129.68, 127.33, 127.23, 127.07, 114.04, 55.42, 36.04, 29.85, 25.74

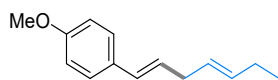

**12**

<sup>13</sup>C NMR (126 MHz, CDCl<sub>3</sub>)

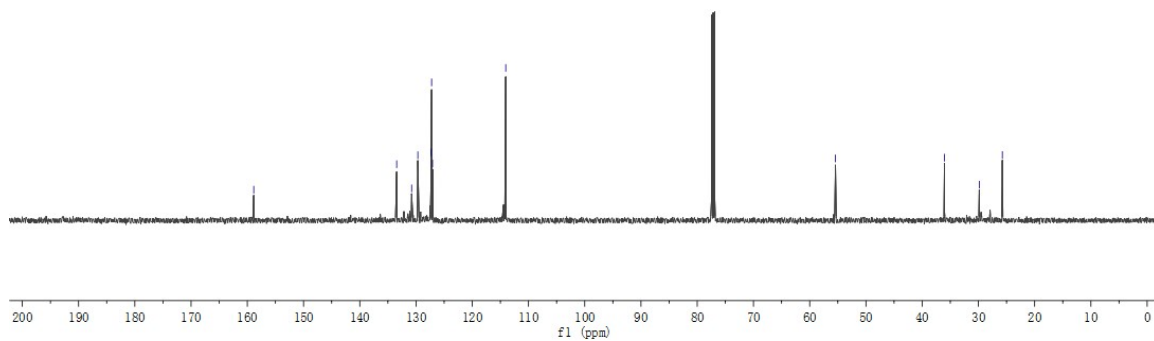



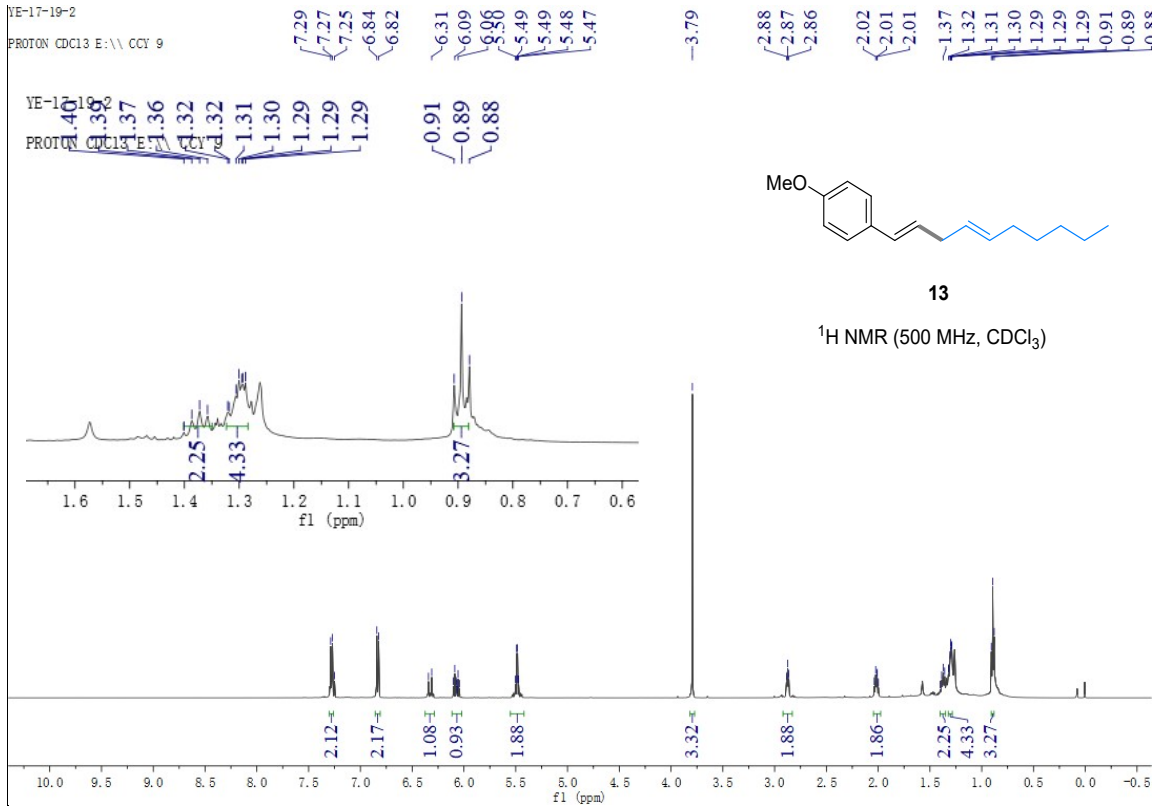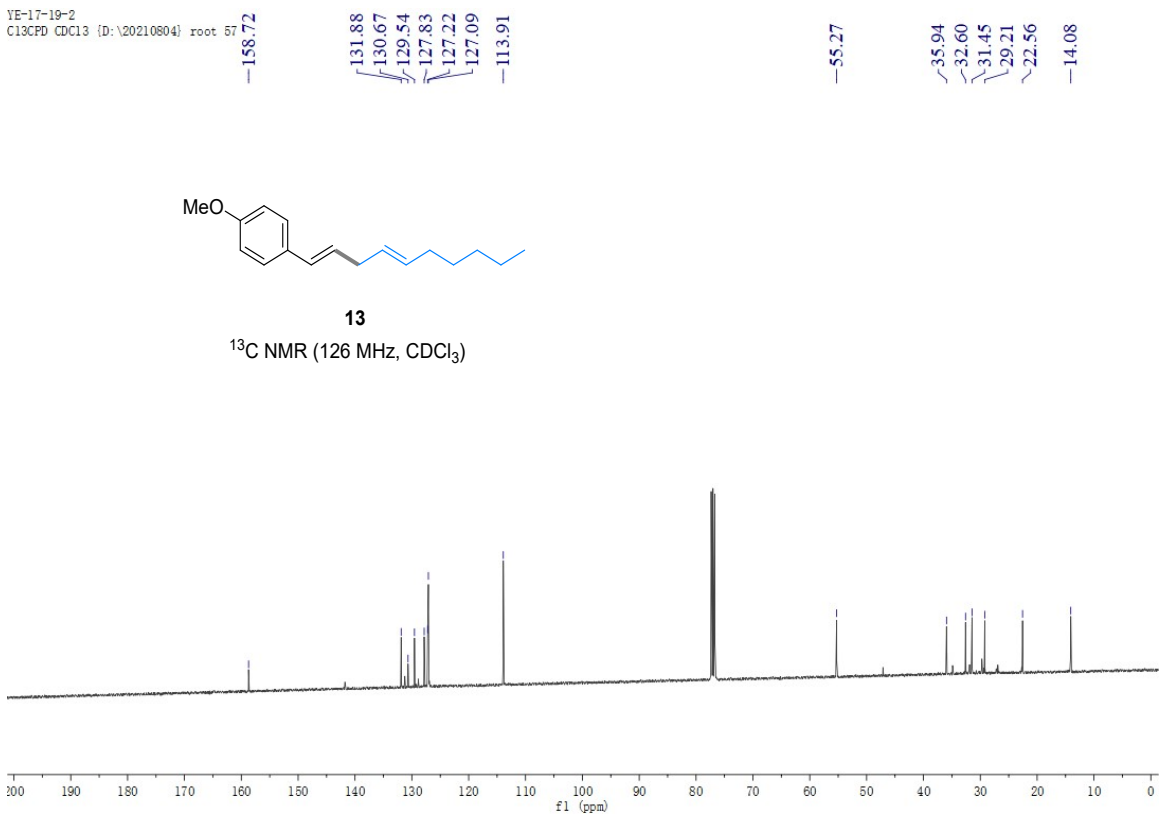

YE-17-26-1  
 PROTON CDCl3 {D:\20210803} root 50

7.28  
 7.26  
 6.84  
 6.82  
 6.34  
 6.30  
 6.06  
 5.92  
 5.23  
 5.21  
 5.20  
 -3.80  
 2.89  
 2.87  
 2.86  
 1.74  
 1.66

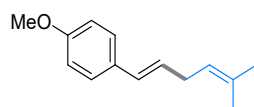**14**

$^1\text{H NMR}$  (500 MHz,  $\text{CDCl}_3$ )

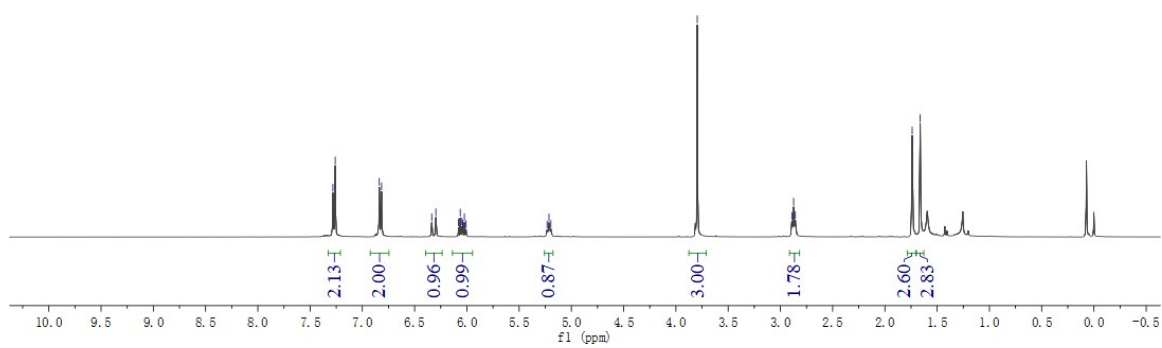

YE-17-26-1  
 C13CPD CDCl3 E:\ \ CCY 20

157.61  
 130.99  
 129.72  
 127.89  
 126.33  
 126.00  
 120.86  
 112.86  
 -54.25  
 -30.55  
 -24.72  
 -16.69

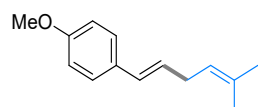**14**

$^{13}\text{C NMR}$  (126 MHz,  $\text{CDCl}_3$ )

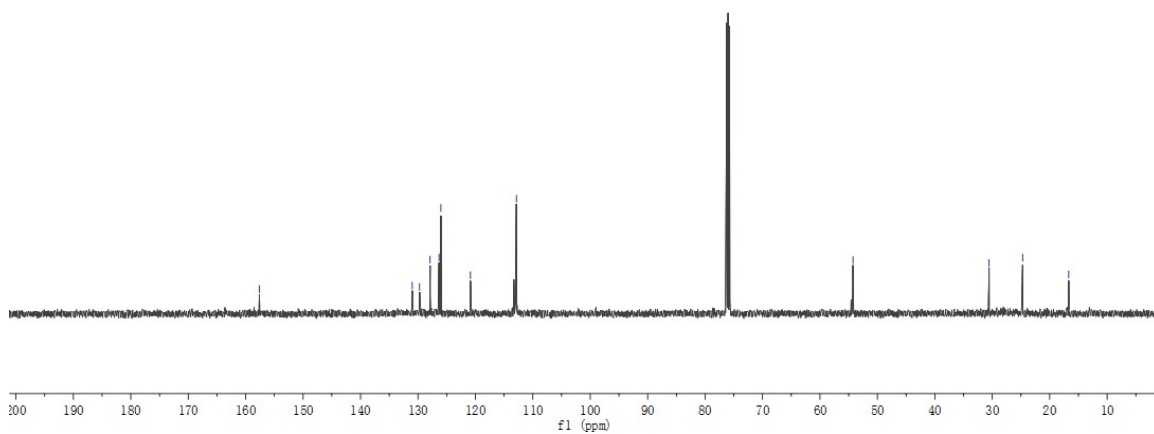

YE-17-10  
 PROTON CDCl3 E:\ \ CCY 23

7.29  
7.27  
7.26  
6.85  
6.83  
6.35  
6.32  
6.08  
6.05  
5.26  
5.24  
5.23  
5.15  
5.14  
5.12  
-3.80  
2.91  
2.90  
2.89  
2.14  
2.13  
2.11  
2.10  
2.10  
2.06  
2.05  
2.03  
1.75  
1.70  
1.67  
1.63

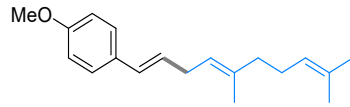

15

 $^1\text{H}$  NMR (500 MHz,  $\text{CDCl}_3$ )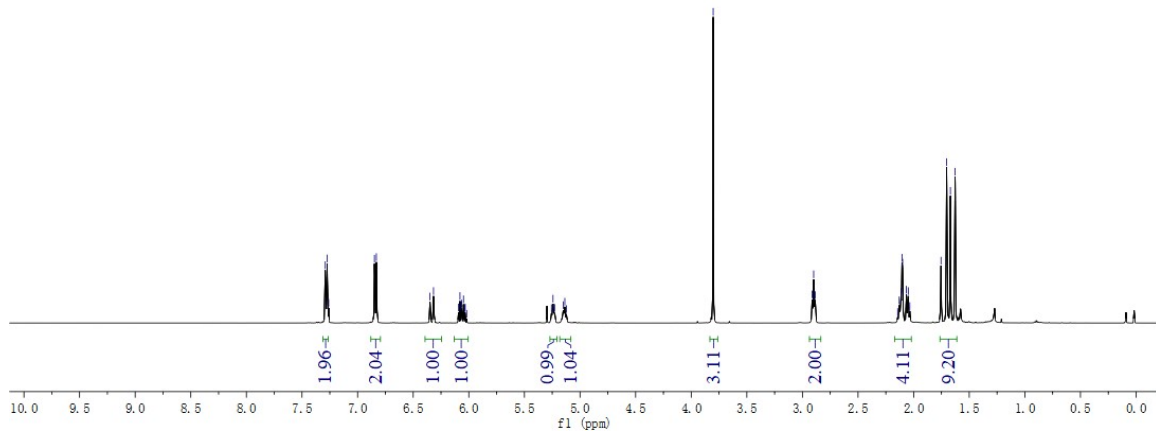

YE-17-10  
 C13CPD CDCl3 E:\ \ CCY 23

158.76  
136.58  
131.57  
130.89  
129.02  
127.49  
127.15  
124.42  
121.79  
114.01  
55.39  
39.87  
31.57  
26.82  
25.86  
17.84  
16.20

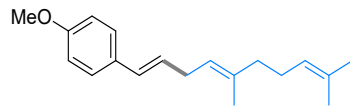

15

 $^{13}\text{C}$  NMR (126 MHz,  $\text{CDCl}_3$ )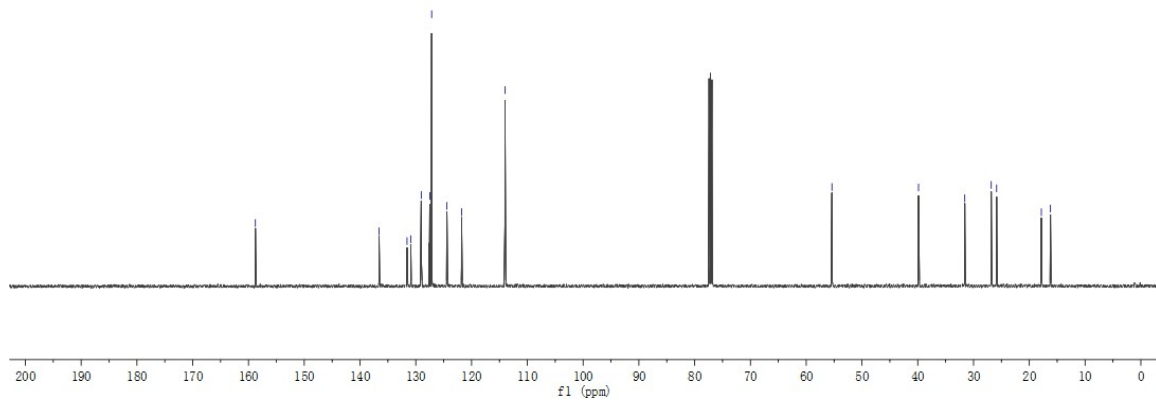

YE-18-1

PROTON CDCl3 E:\ \ CDCl3  
 7.336  
 7.35  
 7.33  
 7.30  
 7.29  
 7.27  
 7.26  
 7.21  
 7.19  
 7.18  
 6.47  
 6.44  
 6.41  
 6.30  
 6.29  
 6.28  
 6.27  
 6.26  
 3.12  
 3.10  
 3.09

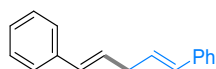**16**<sup>1</sup>H NMR (500 MHz, CDCl<sub>3</sub>)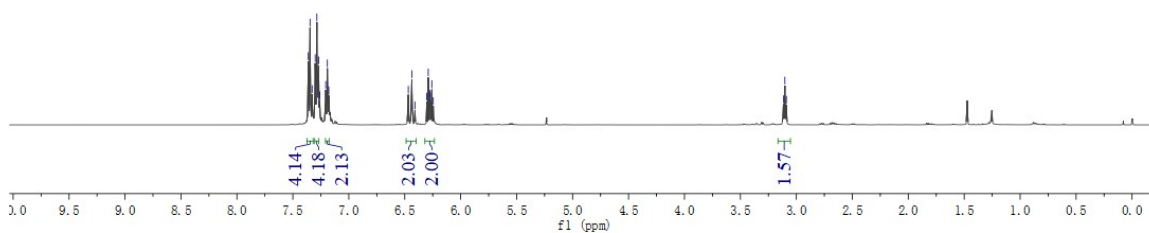

137.76  
 130.97  
 130.54  
 128.64  
 127.31  
 126.20

36.32

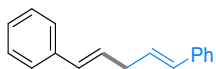**16**<sup>13</sup>C NMR (126 MHz, CDCl<sub>3</sub>)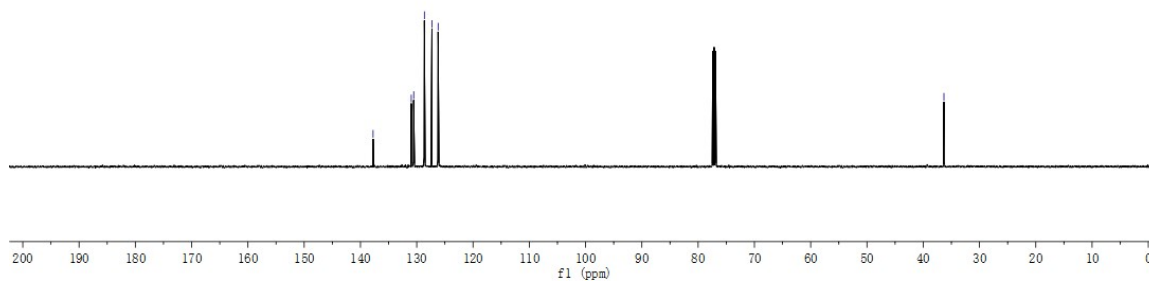

YE-18-16  
 PROTON CDCl3 E:\ \ CCY 31

7.97, 7.95, 7.40, 7.38, 6.42, 6.38, 6.37, 6.35, 6.33, 5.90, 5.89, 5.14, 5.14, 5.11, 5.10, 5.10, 5.10, 5.08, 2.99, 2.98, 2.97

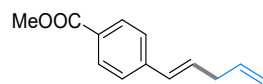

17

$^1\text{H}$  NMR (500 MHz,  $\text{CDCl}_3$ )

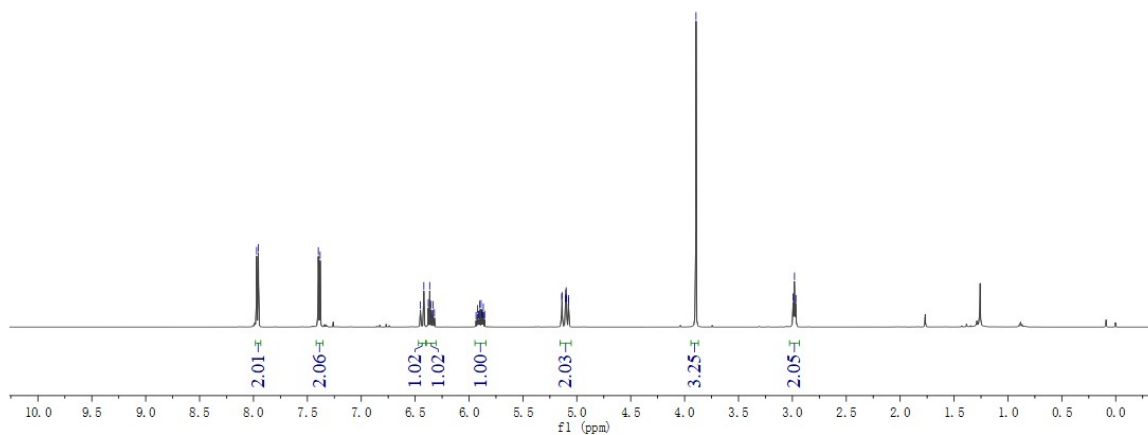

YE-18-16  
 C13CPD CDCl3 E:\ \ CCY 17

167.01, 142.19, 135.93, 131.23, 130.13, 129.97, 128.58, 125.97, 116.21, 52.07, 37.13

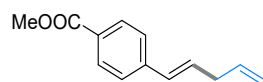

17

$^{13}\text{C}$  NMR (126 MHz,  $\text{CDCl}_3$ )

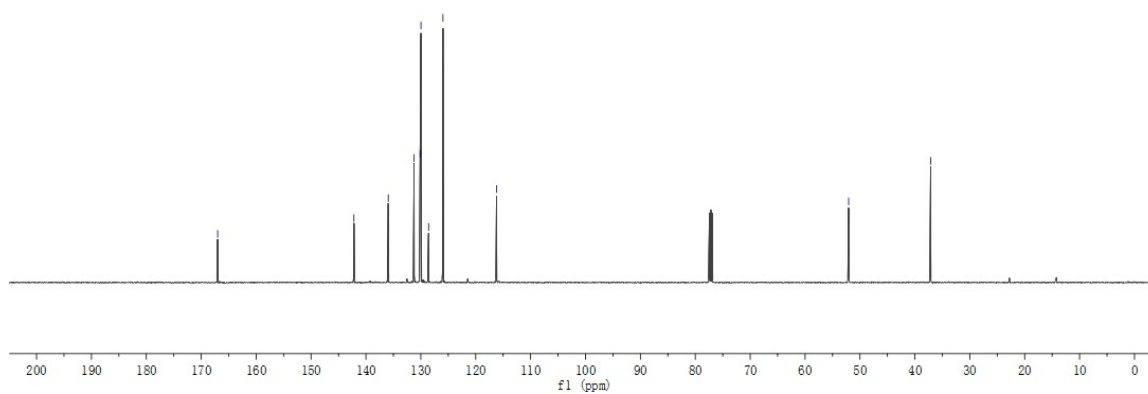

YE-18-38  
 PROTON CDCl<sub>3</sub> {D:\20210804\}

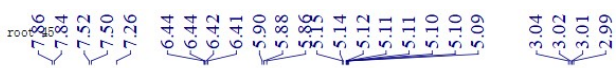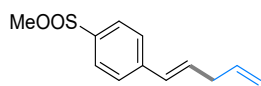**18**

<sup>1</sup>H NMR (500 MHz, CDCl<sub>3</sub>)

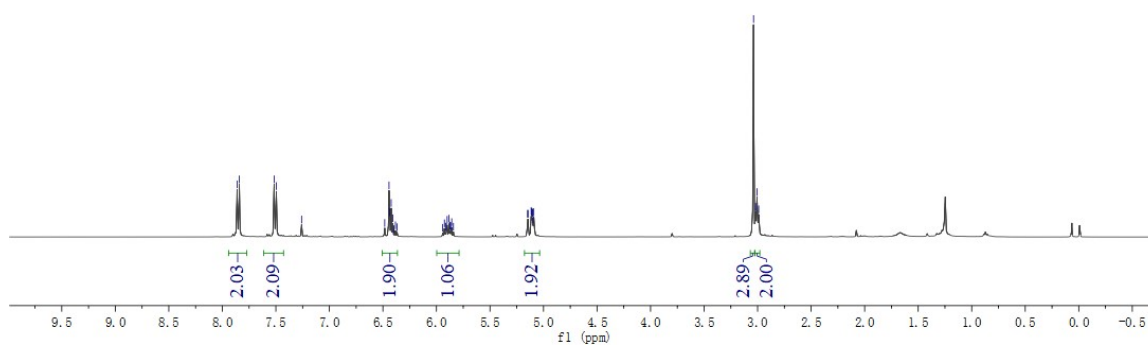

YE-18-38

C13CPD CDCl<sub>3</sub> E:\ \ CCY 15

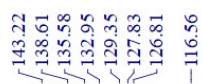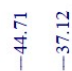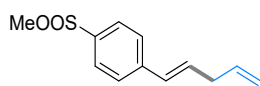**18**

<sup>13</sup>C NMR (126 MHz, CDCl<sub>3</sub>)

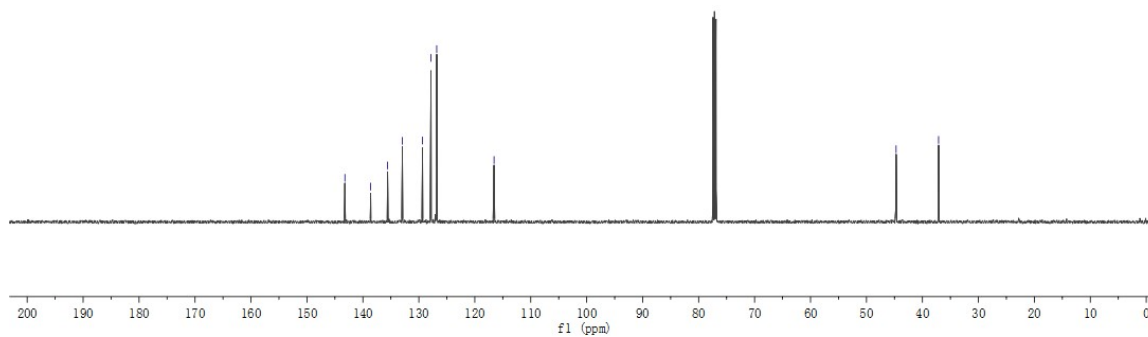

YE-18-12

PROTON CDCl3 E:\CCY 17

7.55  
7.53  
7.44  
7.43  
7.26  
6.46  
6.43  
6.36  
6.35  
6.34  
6.33  
6.32  
6.31  
5.93  
5.92  
5.91  
5.90  
5.89  
5.88  
5.88  
2.99  
2.98

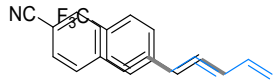

20 19

<sup>1</sup>H NMR (500 MHz, CDCl<sub>3</sub>)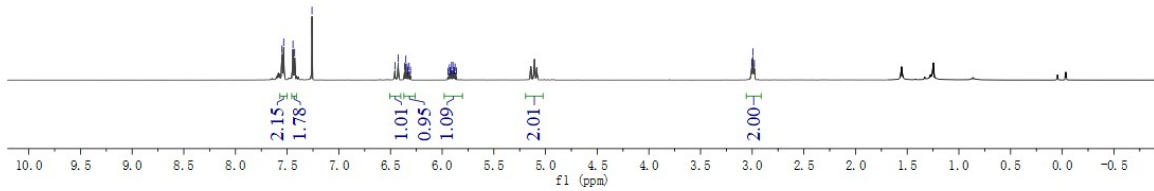

YE-18-12

C13CPD CDCl3 E:\CCY 43

141.22  
135.98  
131.23  
129.78  
129.78  
126.74  
126.44  
126.30  
125.65  
125.62  
125.59  
125.56  
116.31

YE-18-12

C13CPD CDCl3 E:\CCY 43

141.22  
135.98  
131.23  
129.78  
129.78  
126.74  
126.44  
126.30  
125.65  
125.62  
125.59  
125.56  
116.31

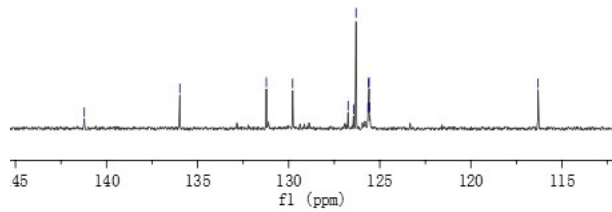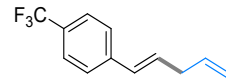

19

<sup>13</sup>C NMR (126 MHz, CDCl<sub>3</sub>)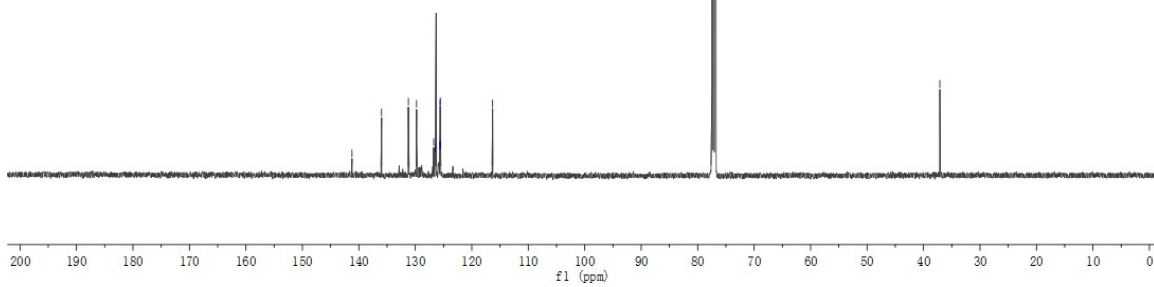

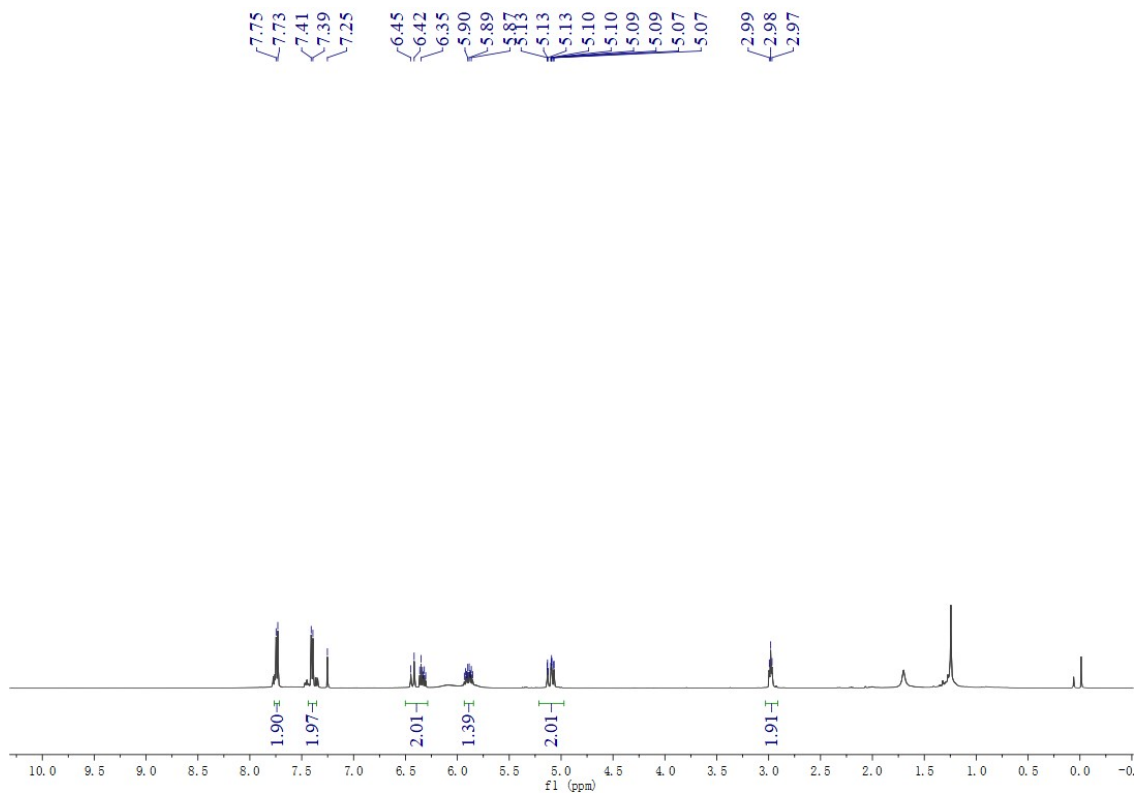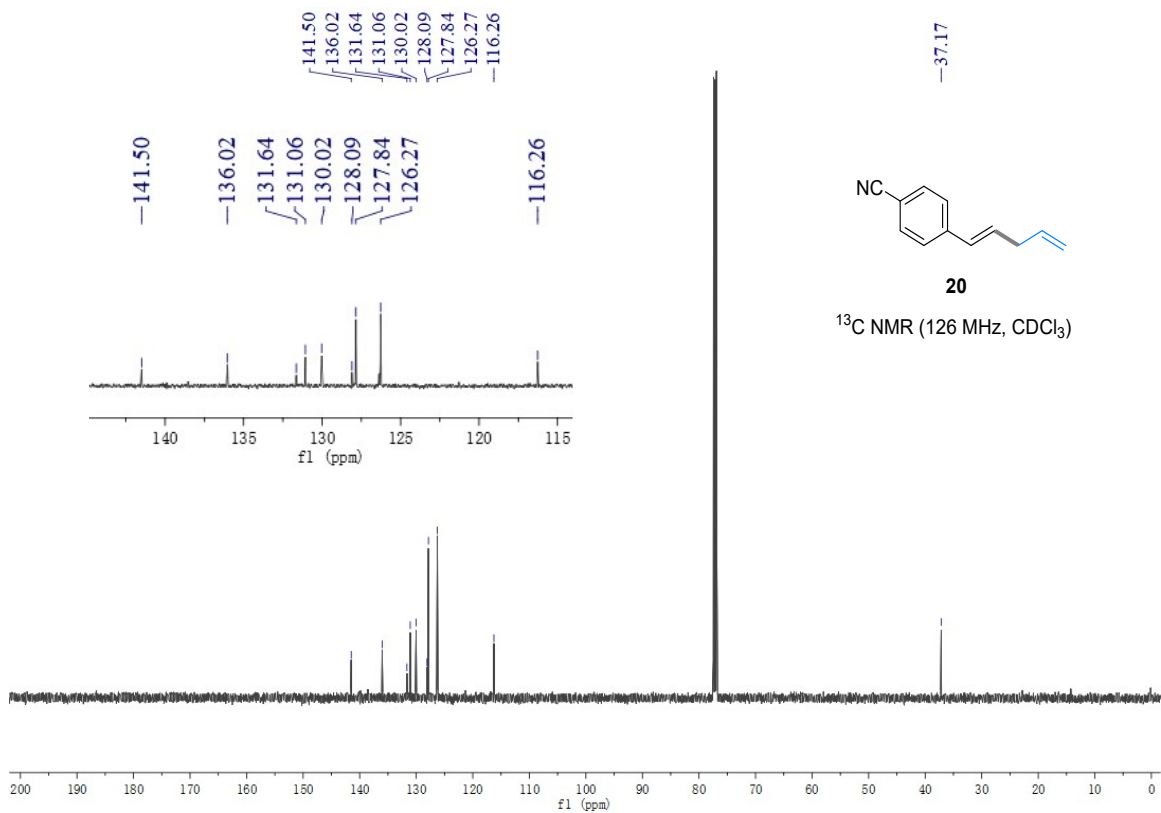



YE-18-16

PROTON CDCl3 E:\ \ CCY 19

7.25  
7.24  
7.11  
7.09  
6.39  
6.36  
6.18  
6.15  
5.89  
5.12  
5.09  
5.08  
5.06  
5.06  
5.04  
5.04  
2.96  
2.95  
2.93  
-2.32

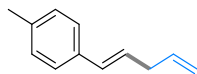**21**<sup>1</sup>H NMR (500 MHz, CDCl<sub>3</sub>)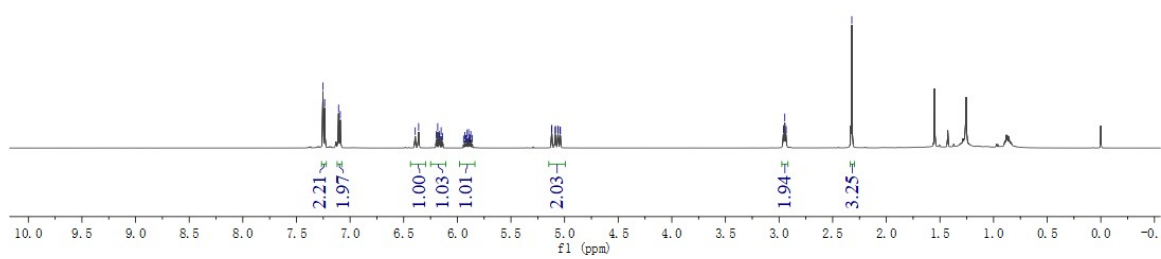

YE-18-16

C13CPD CDCl3 E:\ \ CCY 44

136.89  
136.81  
135.00  
130.84  
129.34  
127.29  
126.09  
115.68  
-37.17  
-29.86

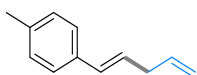**21**<sup>13</sup>C NMR (126 MHz, CDCl<sub>3</sub>)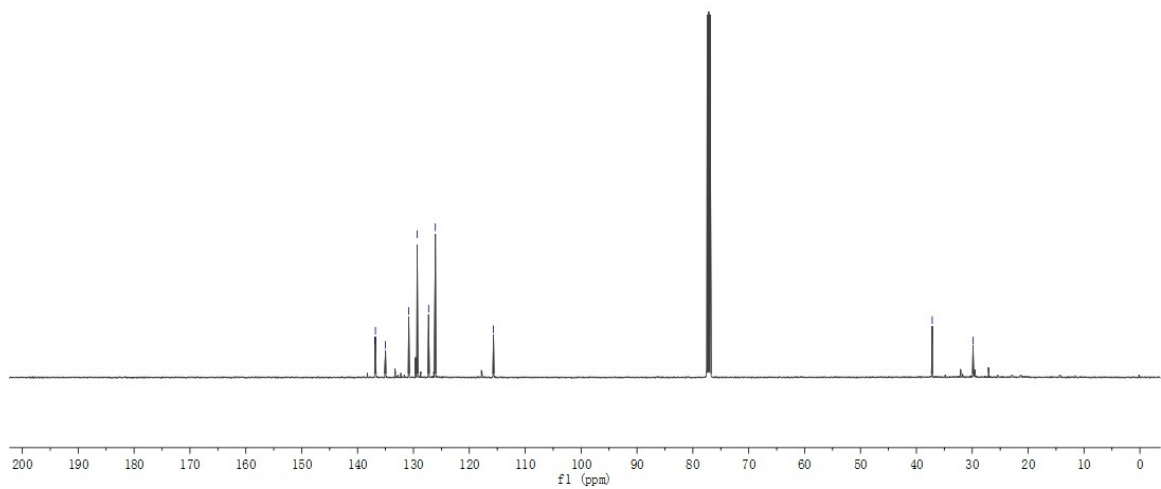

YE-18-6-2  
 PROTON CDCl3 E:\ \ CCY 13

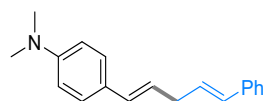

**22**

$^1\text{H}$  NMR (500 MHz,  $\text{CDCl}_3$ )

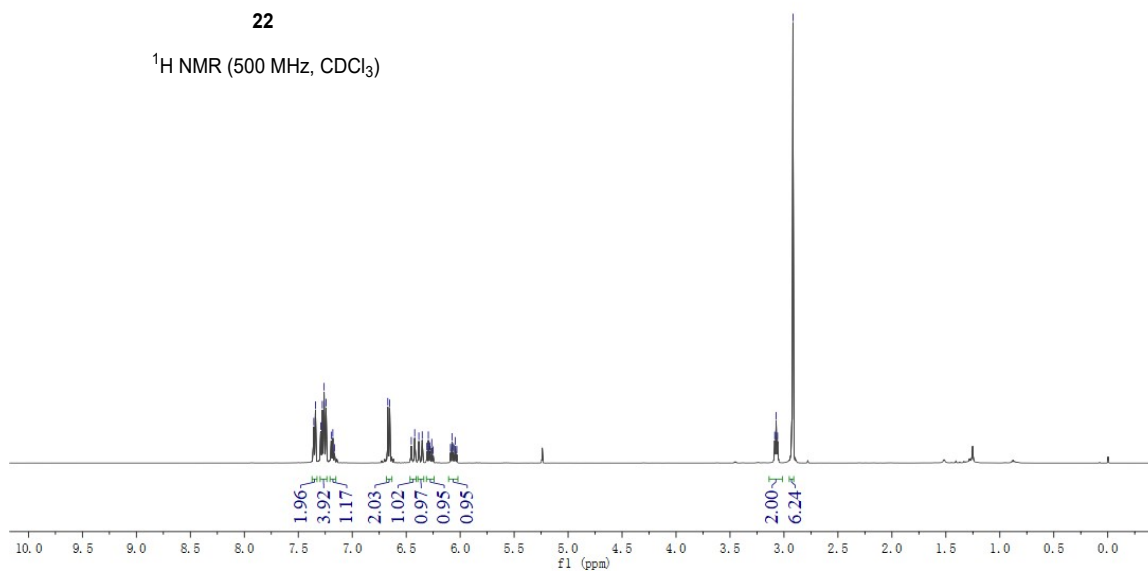

YE-18-6-2  
 C13CPD CDCl3 E:\ \ CCY 13

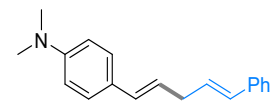

**22**

$^{13}\text{C}$  NMR (126 MHz,  $\text{CDCl}_3$ )

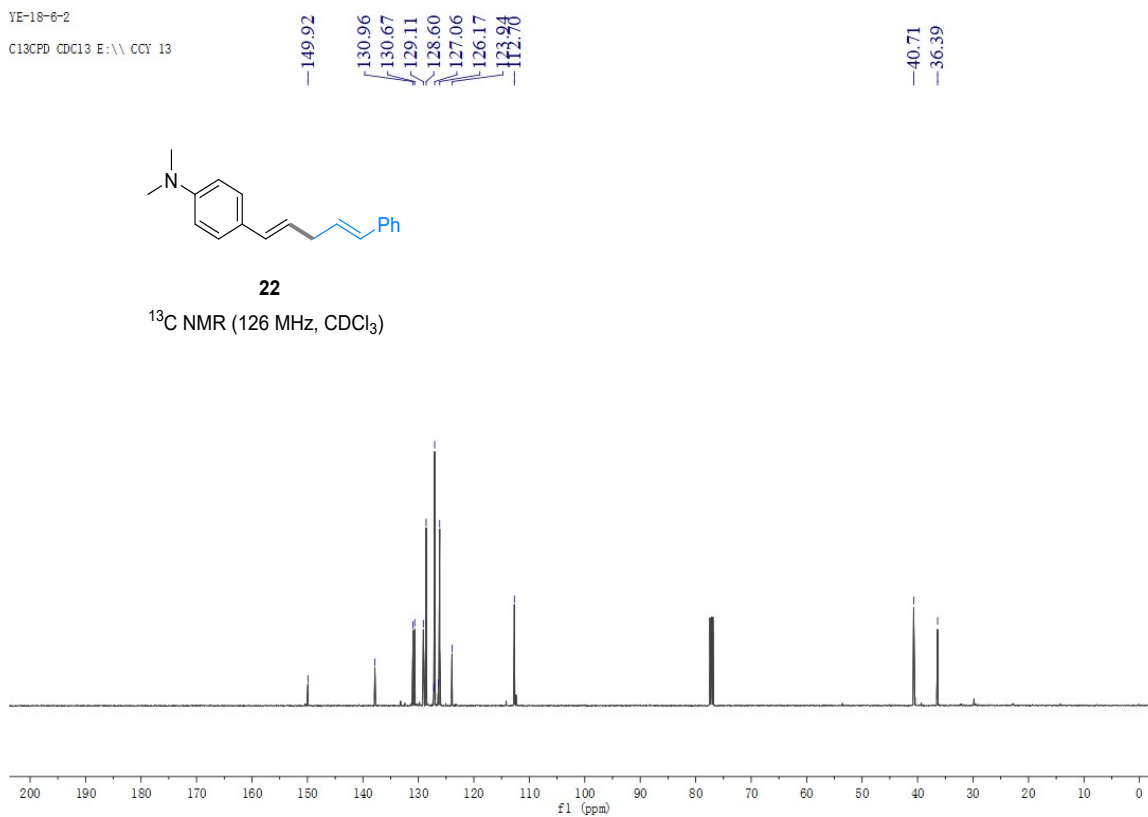

YE-18-7

PROTON CDCl3 E:\ \ CCY 2

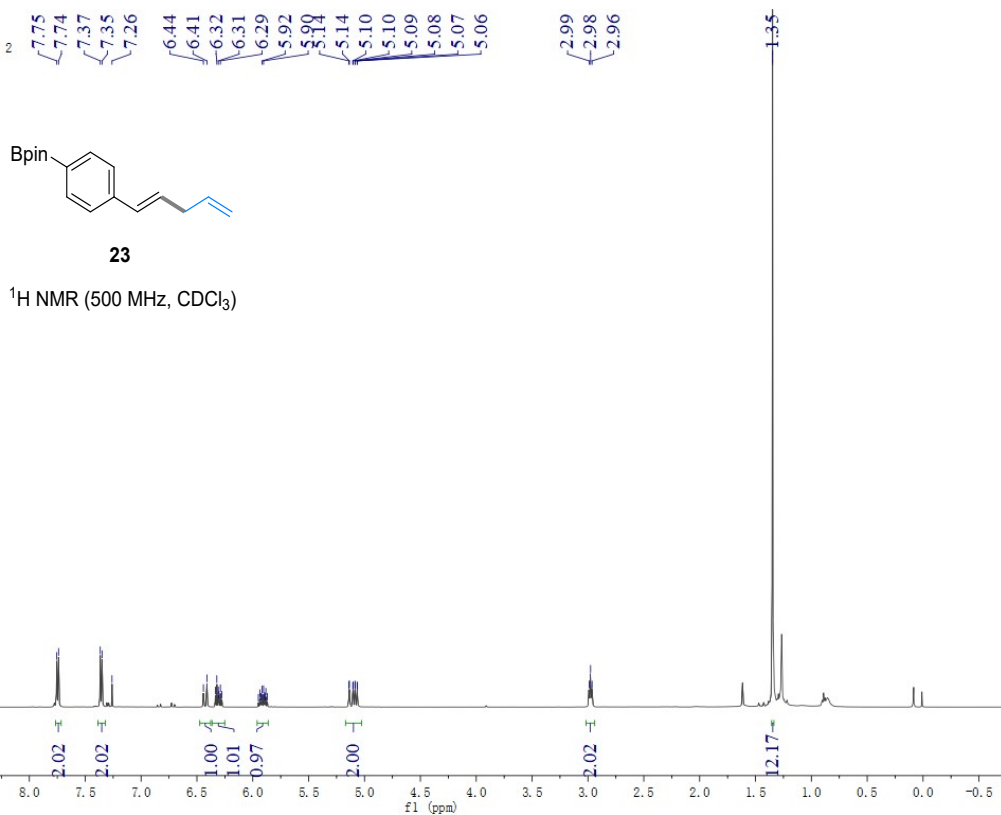

YE-18-7

C13CPD CDCl3 E:\ \ CCY 2

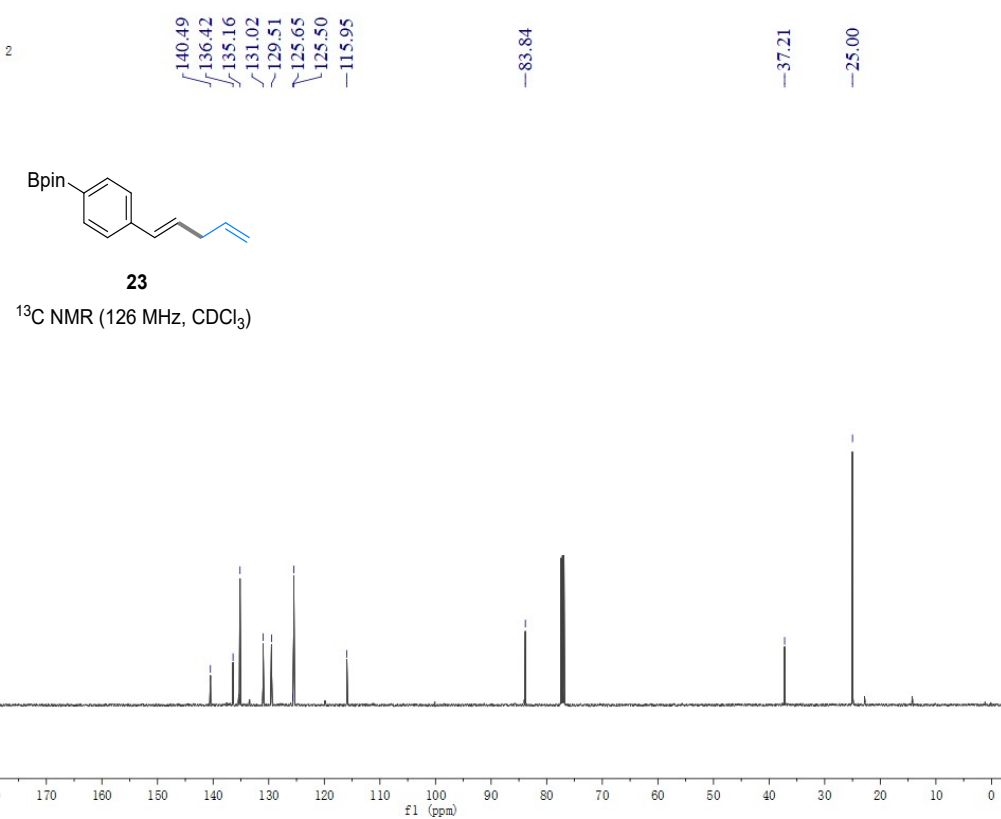

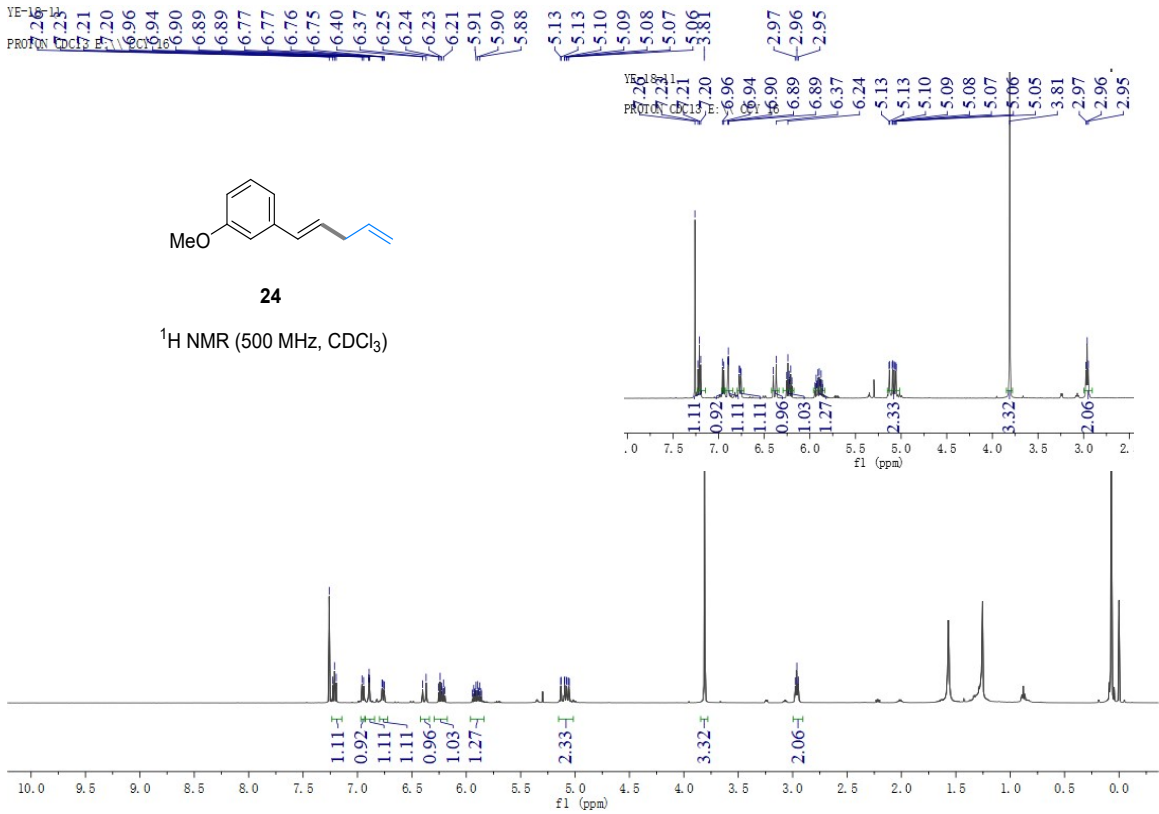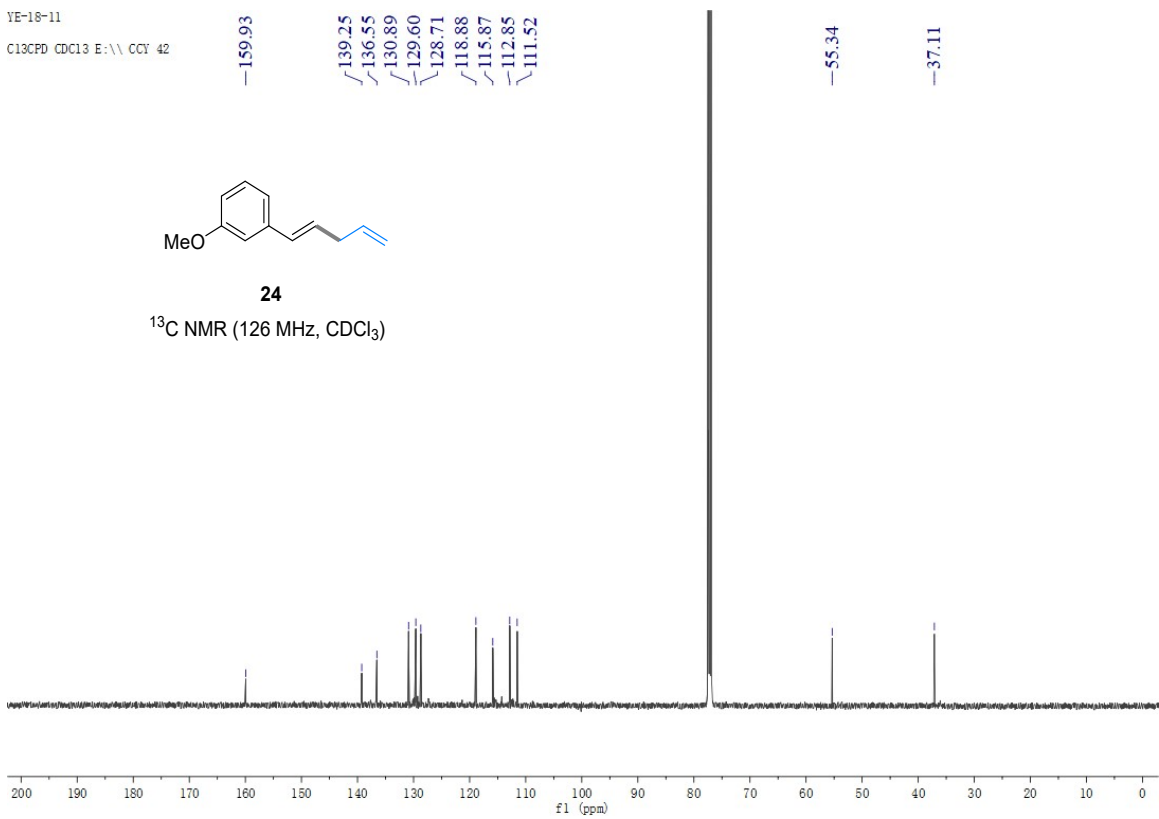

YE-18-37-2  
 PROTON CDCl3 E:\CCY 14

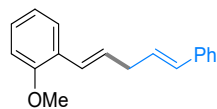**25**<sup>1</sup>H NMR (500 MHz, CDCl<sub>3</sub>)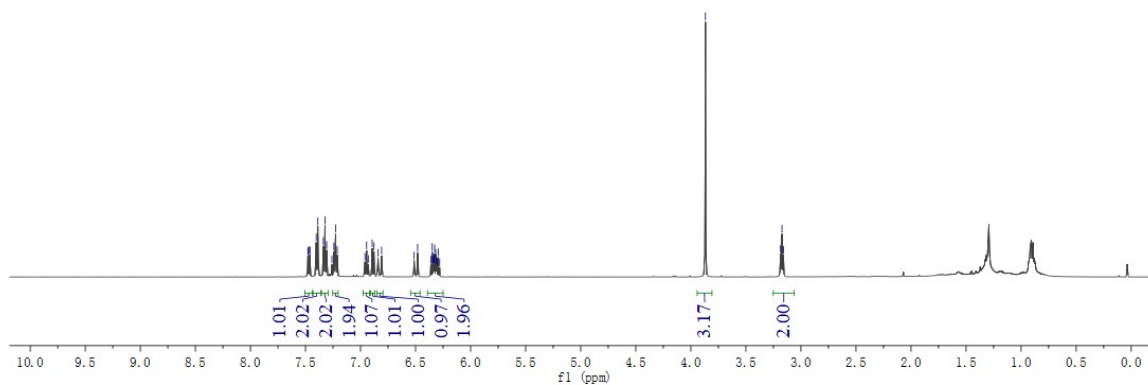

YE-18-37-2  
 C13CPD CDCl3 E:\CCY 14

156.53  
 130.92  
 129.04  
 128.74  
 128.62  
 128.25  
 127.12  
 126.77  
 125.88  
 120.98

-55.55

-36.90

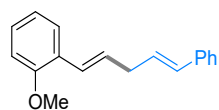**25**<sup>13</sup>C NMR (126 MHz, CDCl<sub>3</sub>)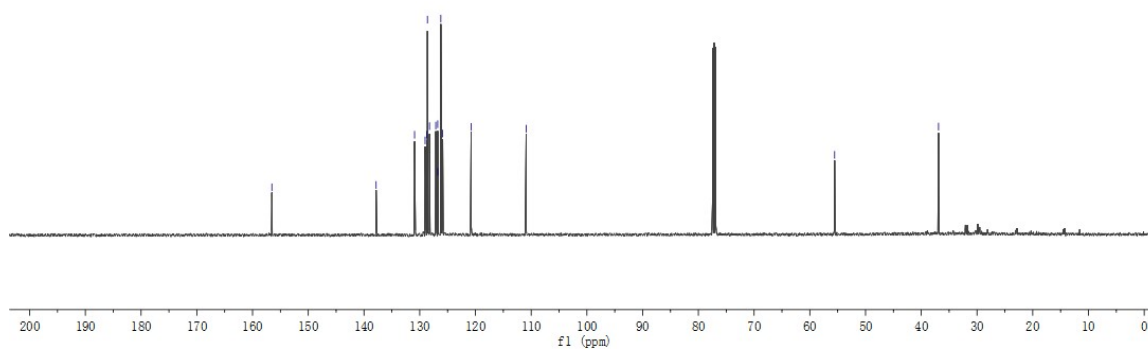

YE-18-17

PROTON CDCl<sub>3</sub> E:\ \ CCY 33

7.26  
6.92  
6.92  
6.89  
6.89  
6.88  
6.87  
6.81  
6.79  
6.37  
6.33  
6.11  
6.08  
5.90  
5.13  
5.13  
5.10  
5.07  
5.07  
3.89  
3.87  
2.96  
2.95  
2.94

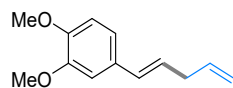**26**<sup>1</sup>H NMR (500 MHz, CDCl<sub>3</sub>)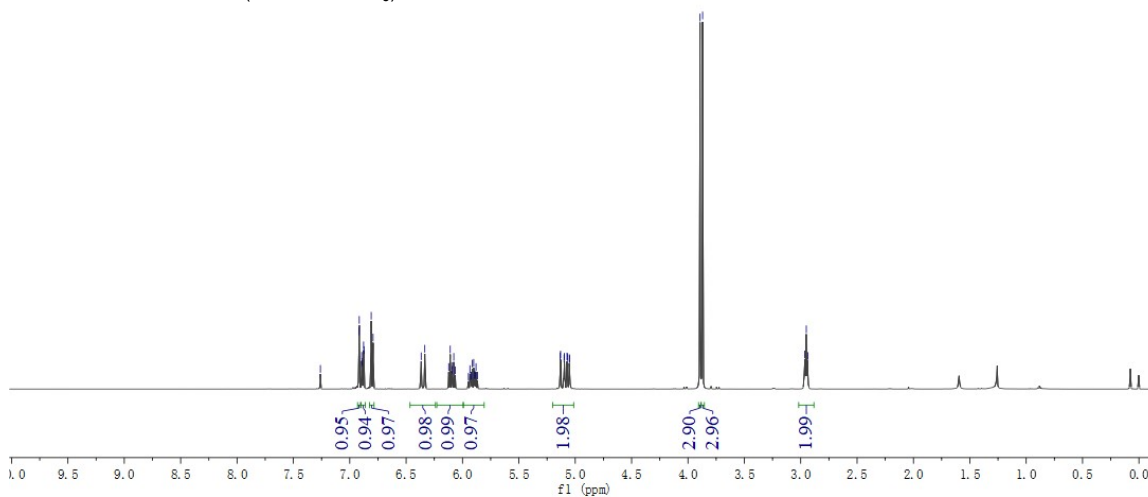

YE-18-18

C13CPD CDCl<sub>3</sub> E:\ \ CCY 18

149.10  
148.49  
136.79  
130.89  
130.58  
126.40  
119.09  
115.68  
111.26  
108.69  
56.03  
55.89  
37.10

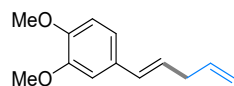**26**<sup>13</sup>C NMR (126 MHz, CDCl<sub>3</sub>)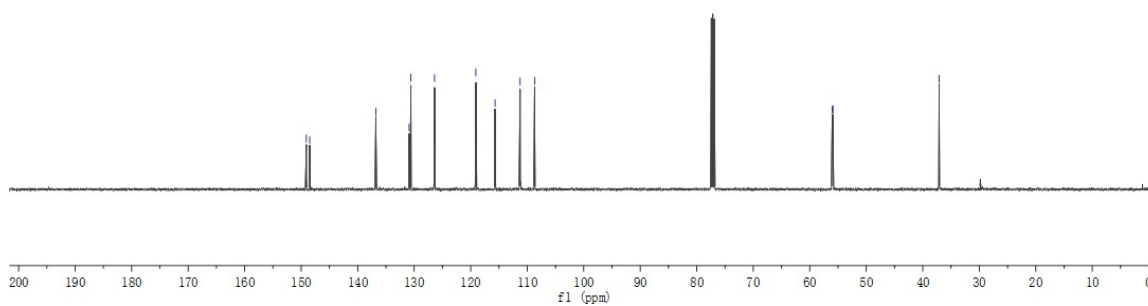

YE-18-19

PROTON CDCl3 E:\ \ CCY 35

-7.26  
 6.58  
 6.35  
 6.32  
 6.16  
 6.12  
 5.91  
 5.89  
 5.14  
 5.13  
 5.10  
 5.10  
 5.08  
 5.08  
 3.87  
 3.83  
 2.97  
 2.96  
 2.94

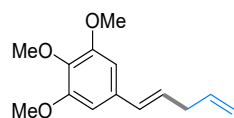**27**<sup>1</sup>H NMR (500 MHz, CDCl<sub>3</sub>)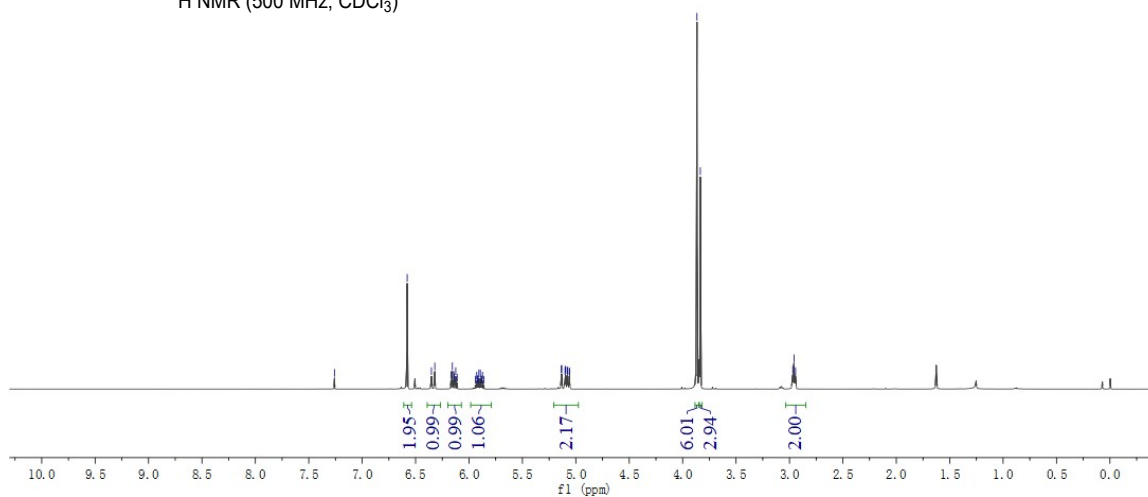

YE-18-19

C13CPD CDCl3 E:\ \ CCY 19

-153.40  
 137.53  
 136.53  
 133.52  
 130.87  
 127.89  
 115.90  
 103.20  
 61.04  
 56.17  
 37.04

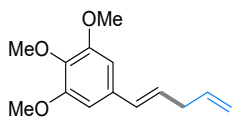**27**<sup>13</sup>C NMR (126 MHz, CDCl<sub>3</sub>)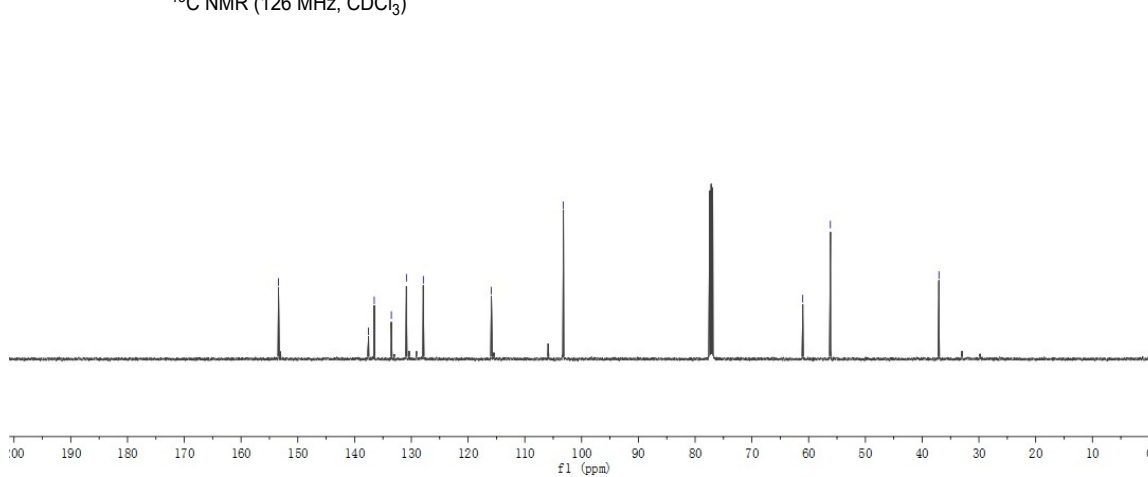

YE-18-14  
 PROTON CDCl<sub>3</sub>  
 7.81  
 7.79  
 7.77  
 7.70  
 7.61  
 7.59  
 7.59  
 7.46  
 7.45  
 7.44  
 7.44  
 7.42  
 7.26  
 6.61  
 6.58  
 6.39  
 6.36  
 5.97  
 5.96  
 5.18  
 5.15  
 5.15  
 5.12  
 5.12  
 5.10  
 5.10  
 3.05  
 3.04  
 3.03

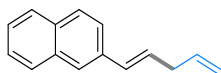**28**<sup>1</sup>H NMR (500 MHz, CDCl<sub>3</sub>)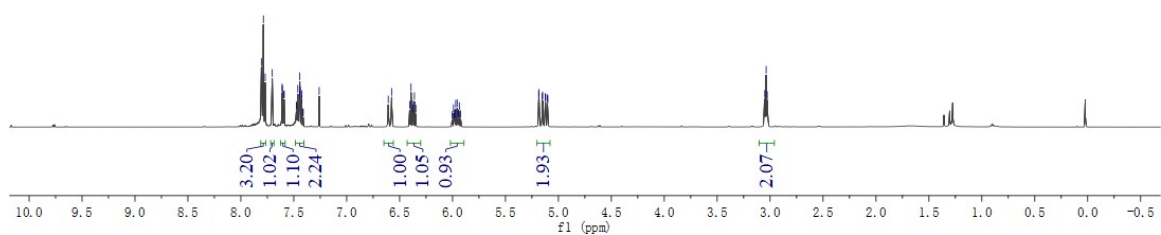

YE-18-14  
 C13CPD CDCl<sub>3</sub> E:\ \ CCY 16

136.58  
 135.22  
 133.82  
 132.89  
 131.09  
 128.80  
 128.22  
 128.00  
 127.77  
 126.29  
 125.73  
 125.69  
 123.70  
 115.92

37.27

YE-18-14

C13CPD CDCl<sub>3</sub>

136.58  
 135.22  
 133.82  
 132.89  
 131.09  
 128.80  
 128.22  
 128.00  
 127.77  
 126.29  
 125.73  
 125.69  
 123.70  
 115.92

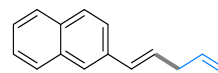**28**<sup>13</sup>C NMR (126 MHz, CDCl<sub>3</sub>)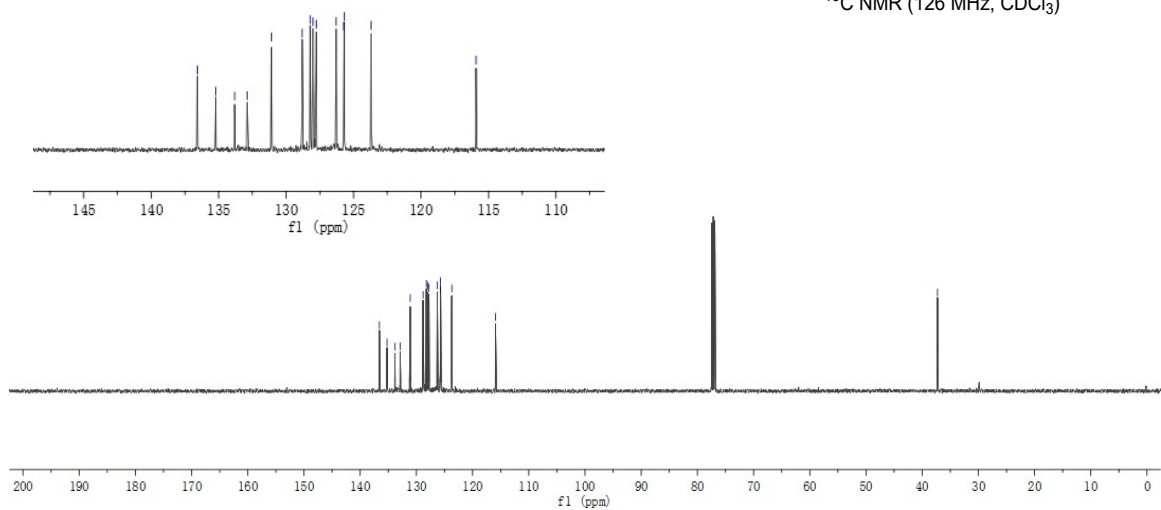



8.91  
8.91  
8.91  
8.94  
8.14  
8.14  
8.12  
8.12  
7.89  
7.88  
7.72  
7.71  
7.69  
7.52  
7.51  
7.49  
7.41  
7.40  
7.40  
7.39  
7.26  
6.49  
6.47  
6.46  
6.45  
6.44  
6.43  
6.03  
6.02  
6.01  
6.01  
5.99  
5.98  
5.98  
5.97  
5.96  
5.20  
5.19  
5.16  
5.16  
5.10  
5.10  
5.08  
5.08  
3.16  
3.15  
3.14  
3.14  
3.13  
3.13

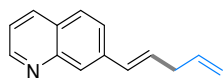**29**<sup>1</sup>H NMR (500 MHz, CDCl<sub>3</sub>)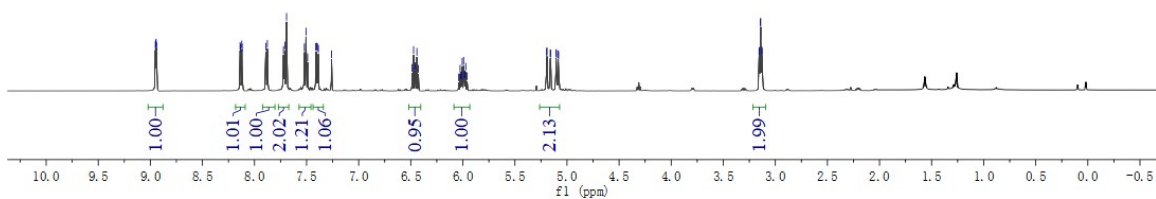

YE-18-42

C13CPD CDCl3 E:\ \ CCY 11

149.58  
145.76  
136.87  
136.47  
136.43  
130.75  
128.58  
126.98  
126.93  
126.58  
125.57  
121.17  
115.78

-37.82

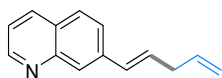**29**<sup>13</sup>C NMR (126 MHz, CDCl<sub>3</sub>)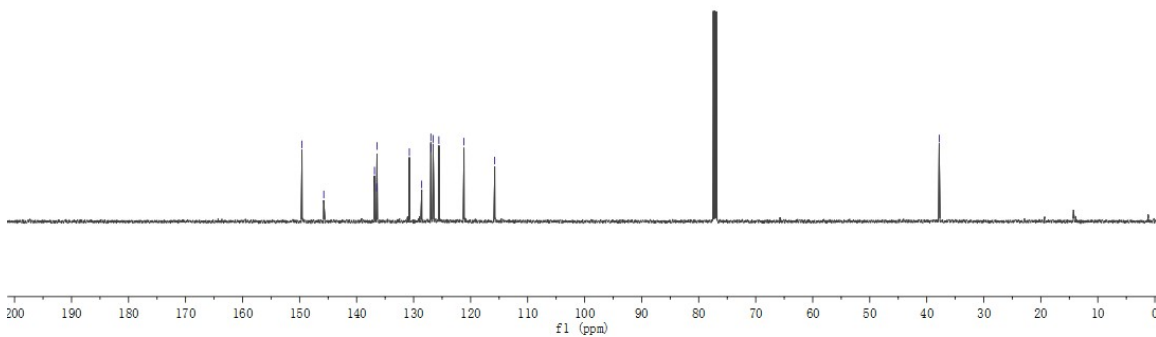

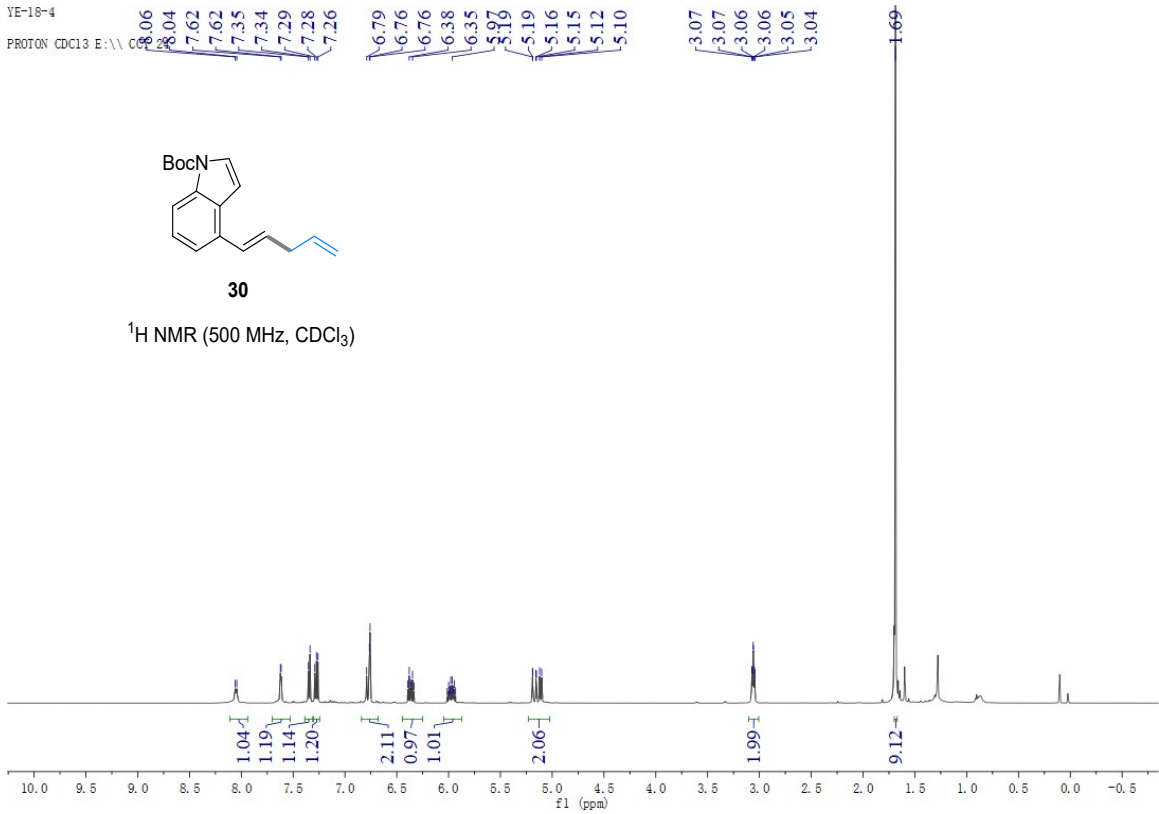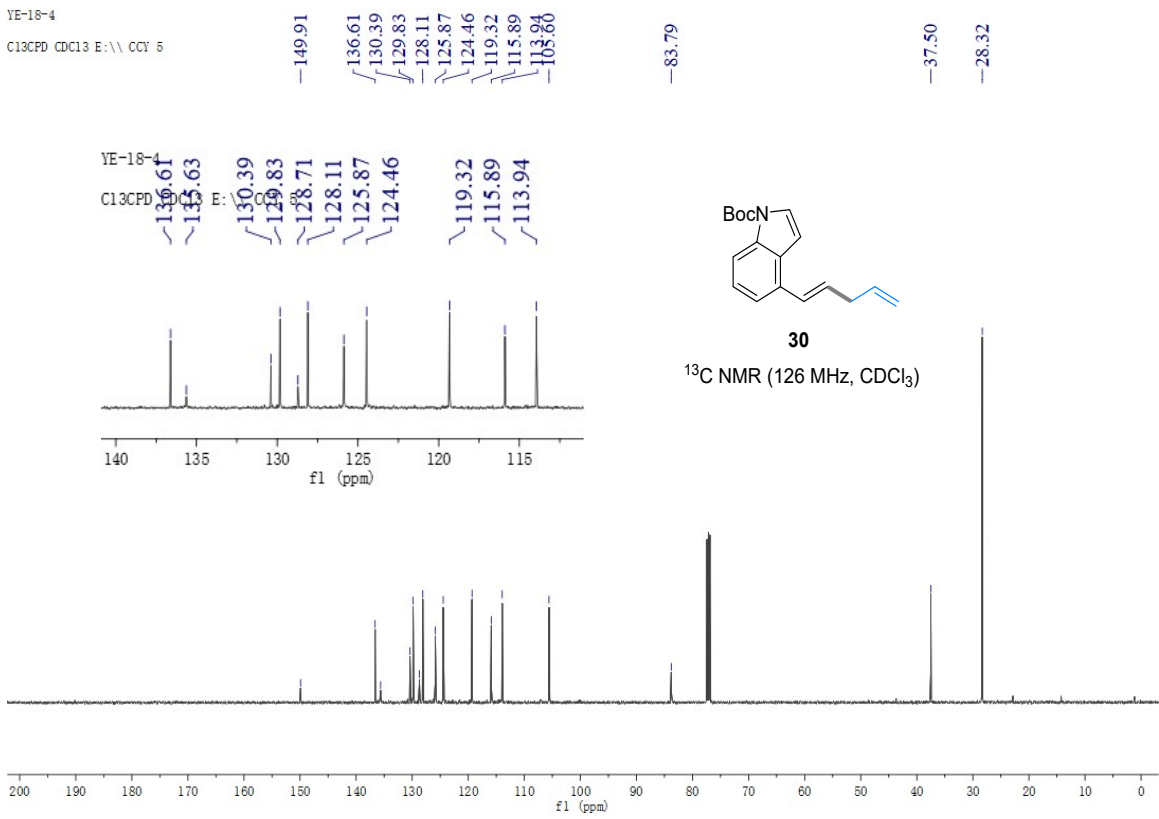

YE-18-41-1  
 PROTON CDCl<sub>3</sub> (D: 20231008) {

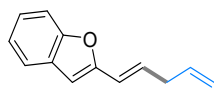**31**<sup>1</sup>H NMR (500 MHz, CDCl<sub>3</sub>)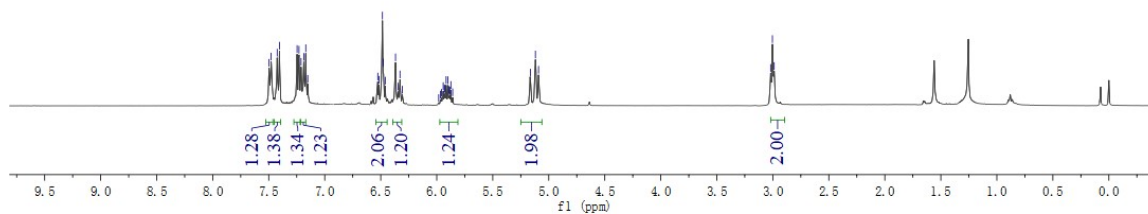

YE-18-41-1  
 C13CPD CDCl<sub>3</sub> E:\ \ CCY 18

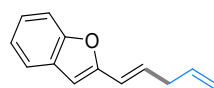**31**<sup>13</sup>C NMR (126 MHz, CDCl<sub>3</sub>)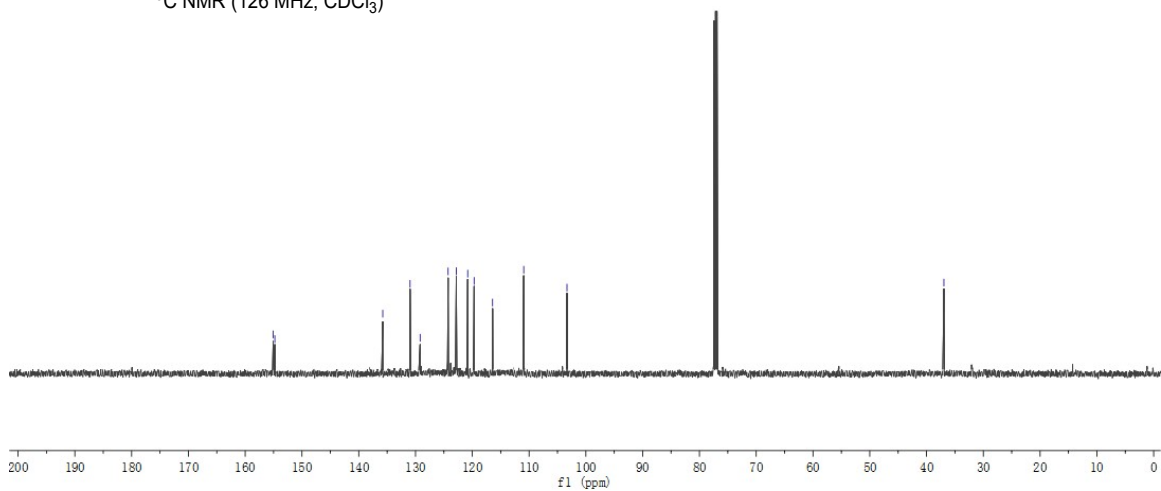

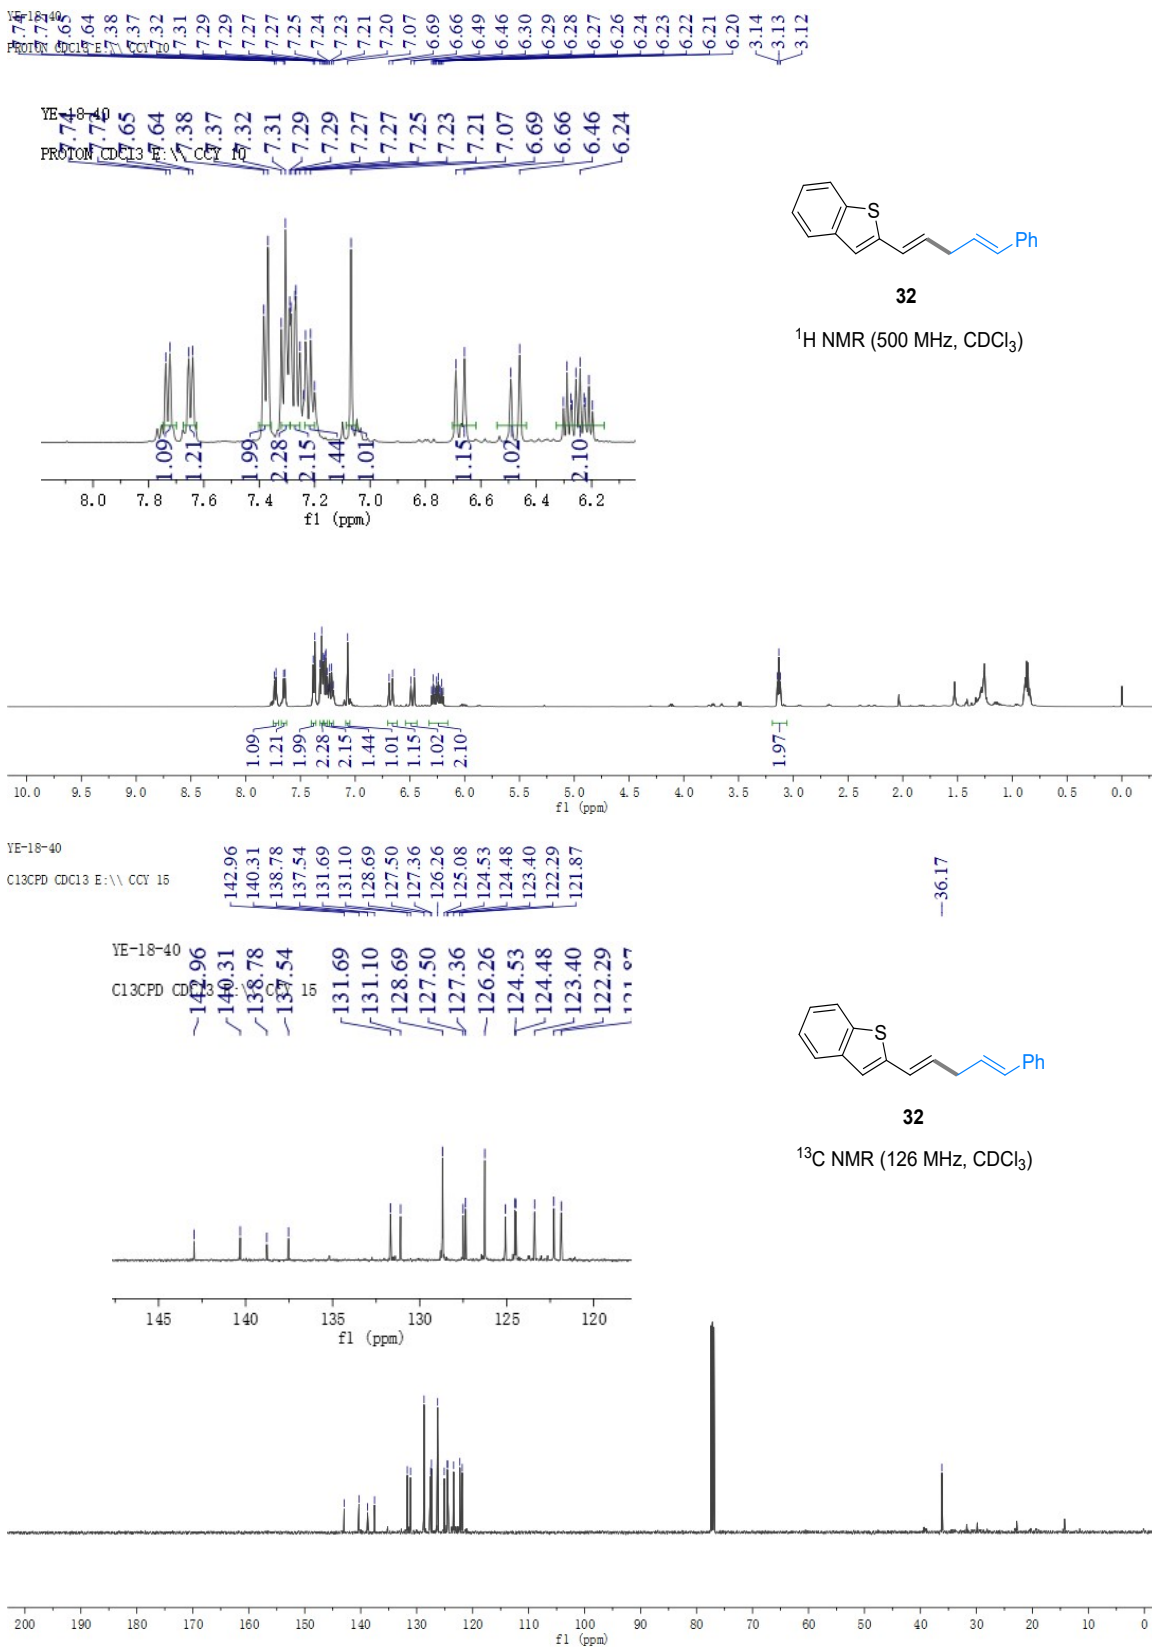

YE-18-3

PROTON CDCl3 E:\ \ CCY 23

8.07  
8.07  
7.64  
7.63  
7.62  
7.26  
6.70  
6.68  
6.35  
6.32  
6.14  
6.13  
6.11  
6.11  
6.09  
5.92  
5.90  
5.89  
5.87  
2.97  
2.96  
2.94

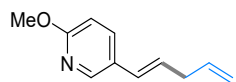**33**<sup>1</sup>H NMR (500 MHz, CDCl<sub>3</sub>)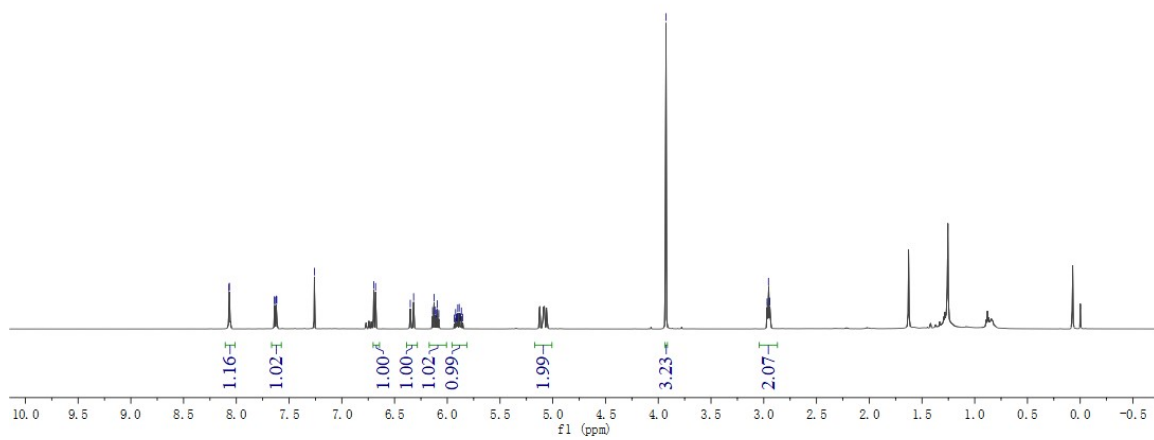

YE-18-3

C13CPD CDCl3 E:\ \ CCY 3

163.44  
145.10  
136.44  
135.51  
129.72  
127.76  
127.05  
115.95  
110.92  
53.60  
37.16

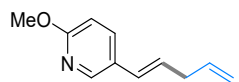**33**<sup>13</sup>C NMR (126 MHz, CDCl<sub>3</sub>)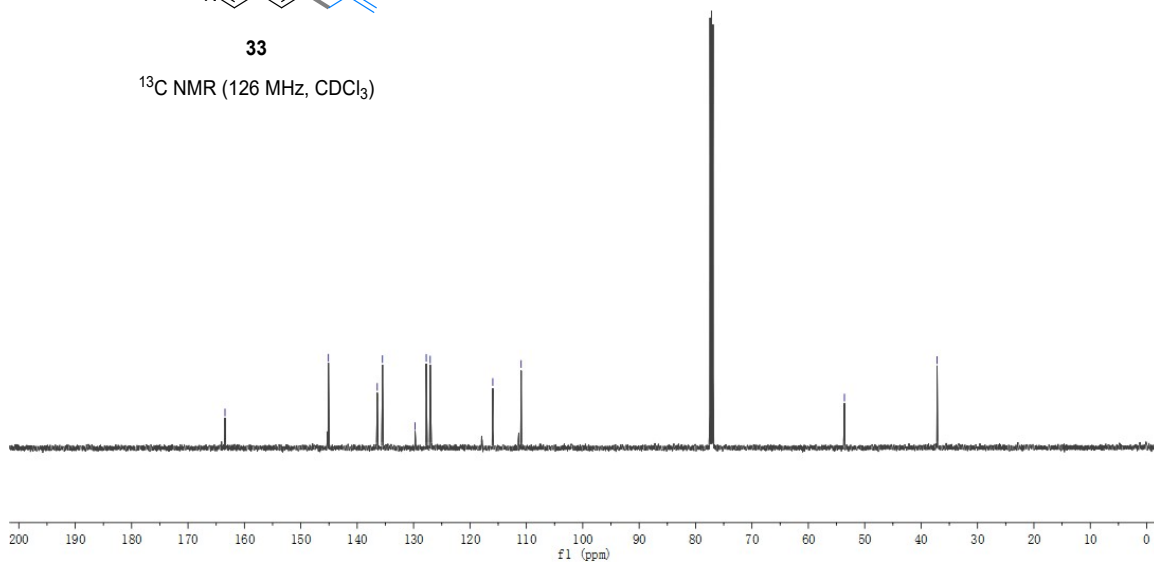

YE-18-2  
 PROTON CDCl<sub>3</sub> E:\CCY 8

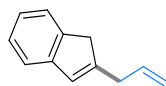

34

<sup>1</sup>H NMR (500 MHz, CDCl<sub>3</sub>)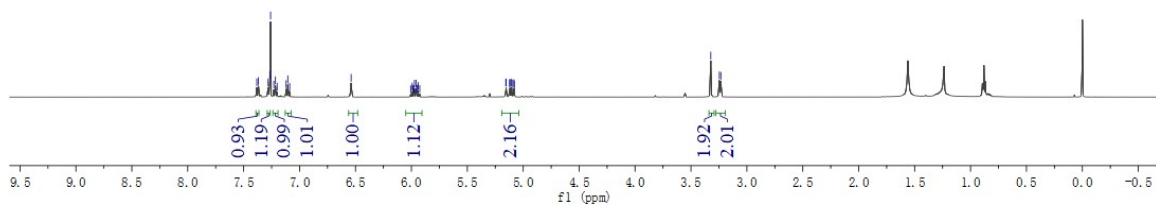

YE-18-2  
 C13CPD CDCl<sub>3</sub> E:\CCY 8

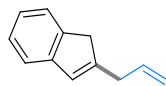

34

<sup>13</sup>C NMR (126 MHz, CDCl<sub>3</sub>)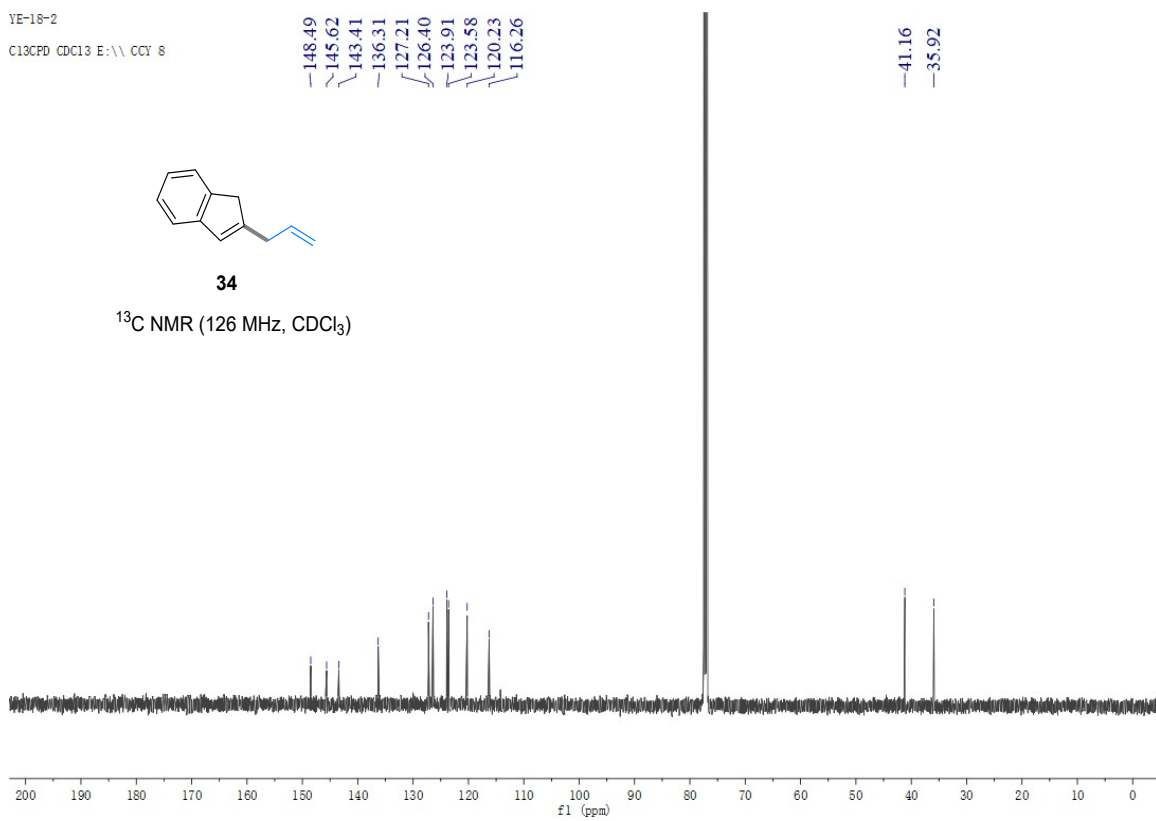

YE-18-39  
 PROTON CDCl3 E:\ \ CCY 24

6.14  
 6.11  
 5.93  
 5.92  
 5.90  
 5.88  
 5.88  
 5.86  
 5.85  
 5.83  
 5.82  
 5.80  
 5.79  
 5.12  
 5.08  
 5.06  
 5.04  
 4.31  
 4.17  
 4.10  
 2.85  
 2.83  
 2.82

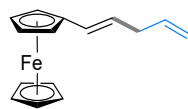**35**

$^1\text{H}$  NMR (500 MHz,  $\text{CDCl}_3$ )

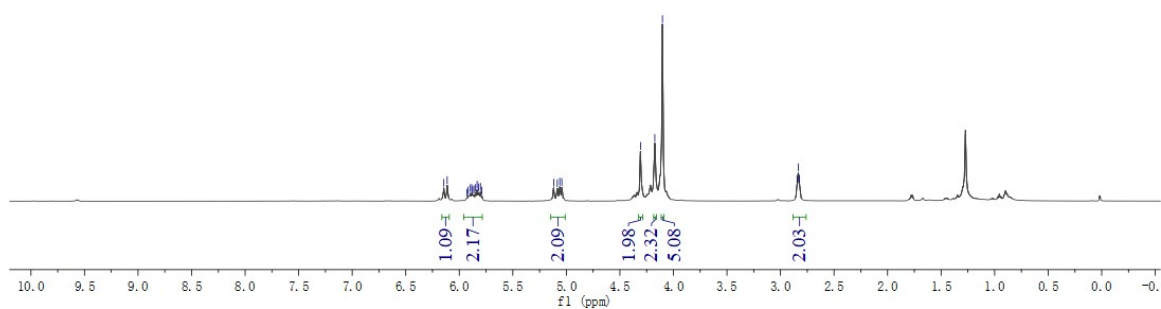

YE-18-39  
 C13CPD CDCl3 E:\ \ CCY 4

137.14  
 128.05  
 125.49  
 115.32  
 83.97  
 70.12  
 69.19  
 68.40  
 66.53  
 37.14  
 29.82

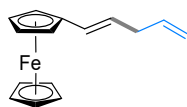**35**

$^{13}\text{C}$  NMR (126 MHz,  $\text{CDCl}_3$ )

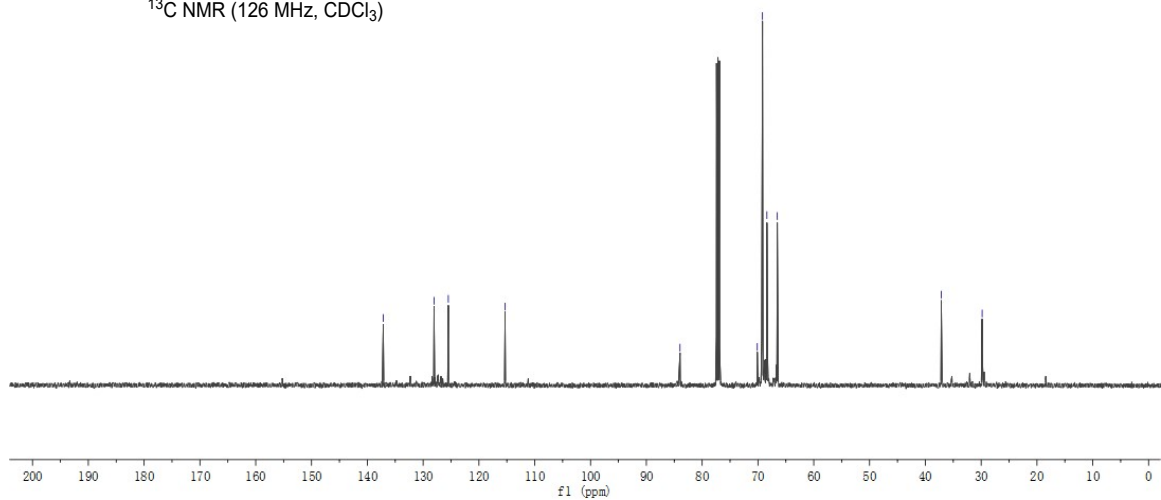

YE-18-20  
 PROTON CDCl<sub>3</sub> E:\CCY 20  
 7.36  
 7.32  
 7.31  
 7.29  
 7.26  
 7.22  
 7.21  
 6.81  
 6.79  
 6.78  
 6.75  
 6.50  
 6.46  
 6.24  
 6.22  
 5.88  
 5.87  
 5.85  
 5.84  
 5.82  
 5.81  
 5.11  
 5.08  
 5.08  
 5.07  
 5.07  
 5.07  
 5.05  
 5.05  
 2.93  
 2.91  
 2.90

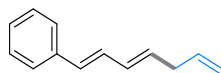**36**<sup>1</sup>H NMR (500 MHz, CDCl<sub>3</sub>)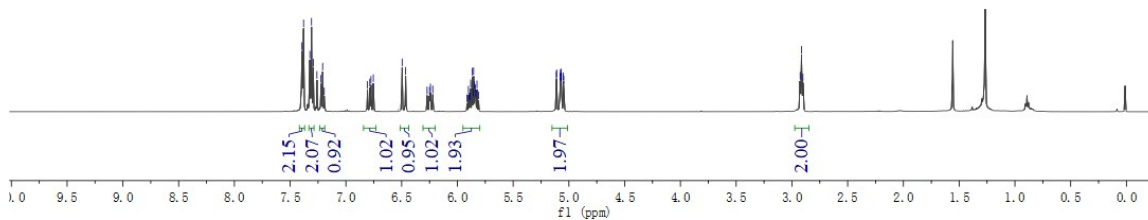

YE-18-20

C13CPD CDCl<sub>3</sub> E:\CCY 20

137.67  
 136.47  
 132.78  
 131.65  
 130.86  
 129.22  
 128.70  
 127.36  
 126.34  
 115.78

-37.01

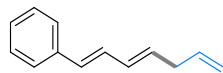**36**<sup>13</sup>C NMR (126 MHz, CDCl<sub>3</sub>)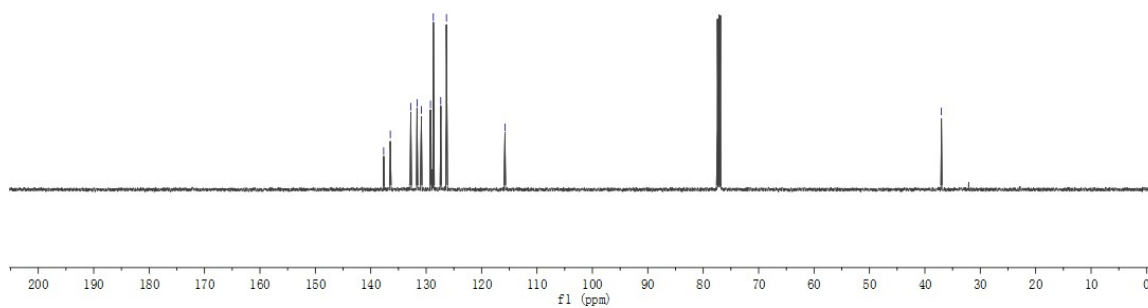



YE-18-27

PROTON CDCl3 E:\ \ CCY 1

7.26  
7.21  
6.88  
6.86  
6.47  
6.44  
5.92  
5.91  
5.63  
5.60  
5.14  
5.14  
5.06  
5.06  
5.04  
5.04  
3.07  
3.06  
3.05

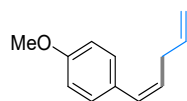**37**<sup>1</sup>H NMR (500 MHz, CDCl<sub>3</sub>)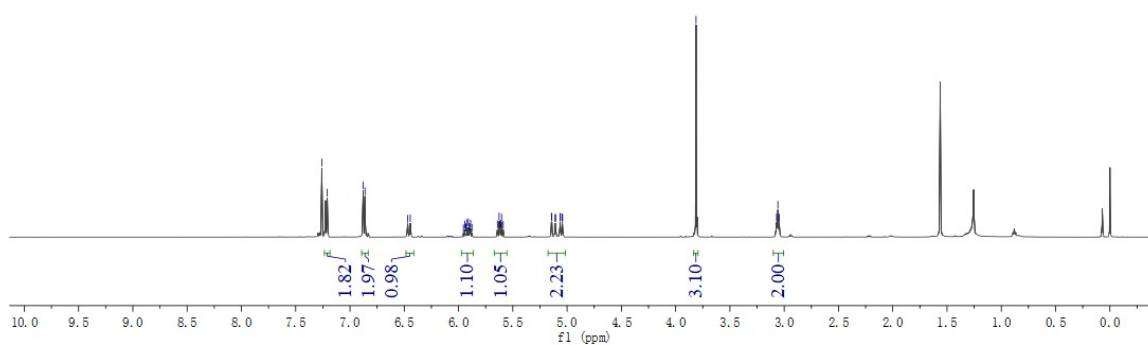

YE-18-27

C13CPD CDCl3 E:\ \ CCY 15

158.52  
136.95  
130.11  
129.99  
129.64  
128.06  
115.32  
113.75  
55.40  
32.87

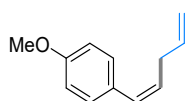**37**<sup>13</sup>C NMR (126 MHz, CDCl<sub>3</sub>)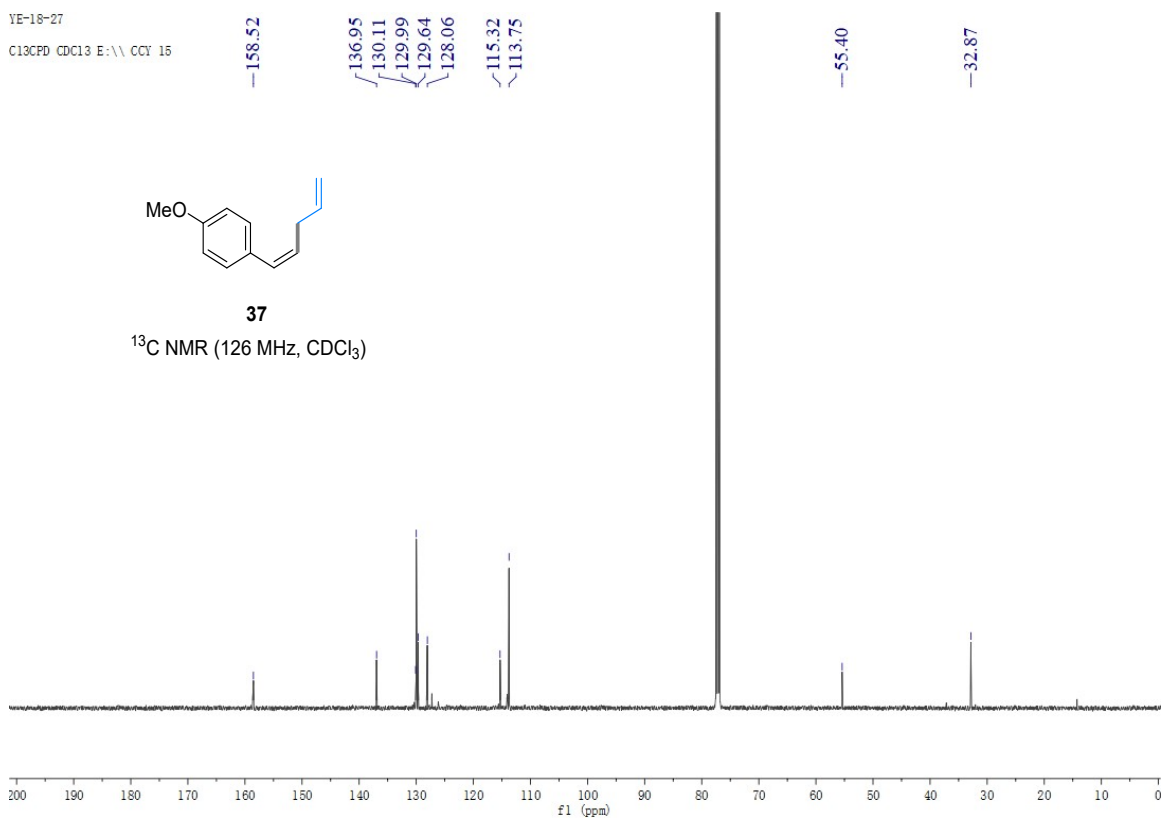

YE-18-30-1

PROTON CDCl3 E:\ \ CCY 18

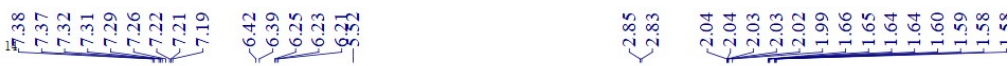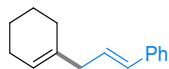**38**<sup>1</sup>H NMR (500 MHz, CDCl<sub>3</sub>)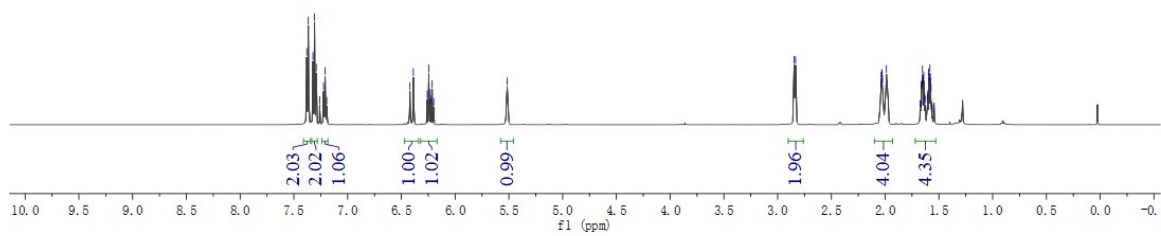

YE-18-30-1

C13CPD CDCl3 E:\ \ CCY 30

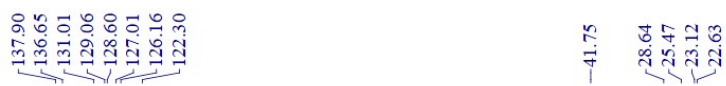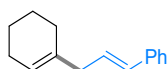**38**<sup>13</sup>C NMR (126 MHz, CDCl<sub>3</sub>)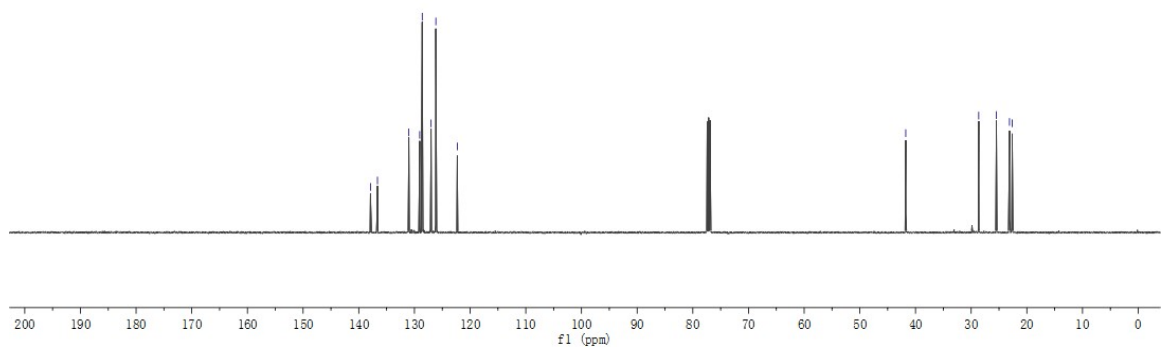

8.216  
 8.161  
 8.129  
 8.089  
 8.083  
 5.82  
 5.81  
 5.81  
 5.80  
 5.79  
 5.78  
 5.77  
 5.77  
 5.75  
 5.75  
 5.66  
 5.65  
 5.63  
 5.62  
 5.55  
 5.54  
 5.06  
 5.06  
 5.03  
 5.02  
 5.01  
 5.01  
 4.99  
 4.99  
 4.60  
 4.60  
 4.58  
 4.58  
 4.29  
 4.29  
 4.28  
 4.28  
 4.25  
 4.25  
 4.24  
 4.24  
 4.18  
 4.18  
 4.17  
 4.17  
 4.16  
 4.16  
 2.84  
 2.83  
 2.81  
 1.53  
 1.46  
 1.34  
 1.33

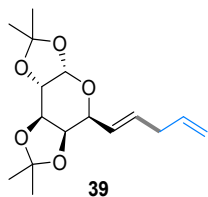

$^1\text{H NMR}$  (500 MHz,  $\text{CDCl}_3$ )

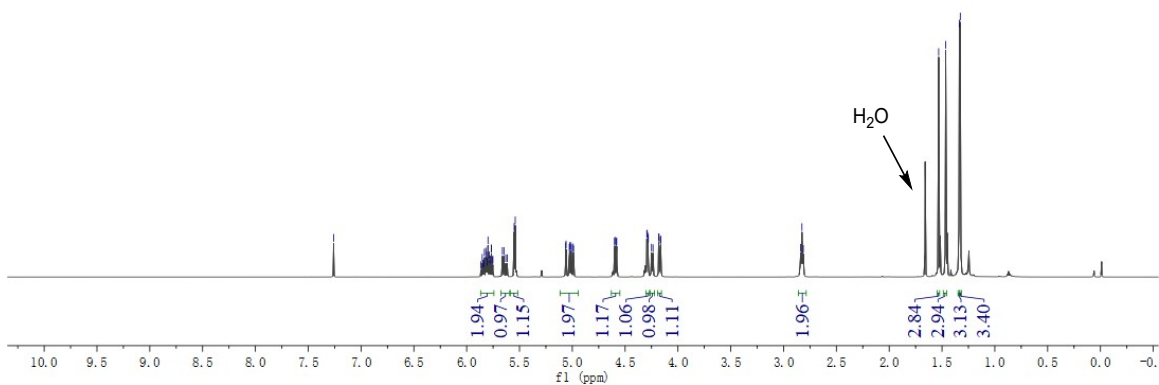

YE-18-26-2

C13CPD CDCl3 E:\ \ CCY 7

~136.35  
 ~132.69  
 ~126.73  
 ~115.77  
 ~109.29  
 ~108.54  
 ~96.62  
 73.74  
 70.99  
 70.54  
 69.10  
 ~36.70  
 ~26.26  
 ~26.11  
 ~25.07  
 ~24.47

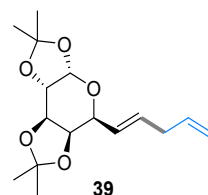

$^{13}\text{C NMR}$  (126 MHz,  $\text{CDCl}_3$ )

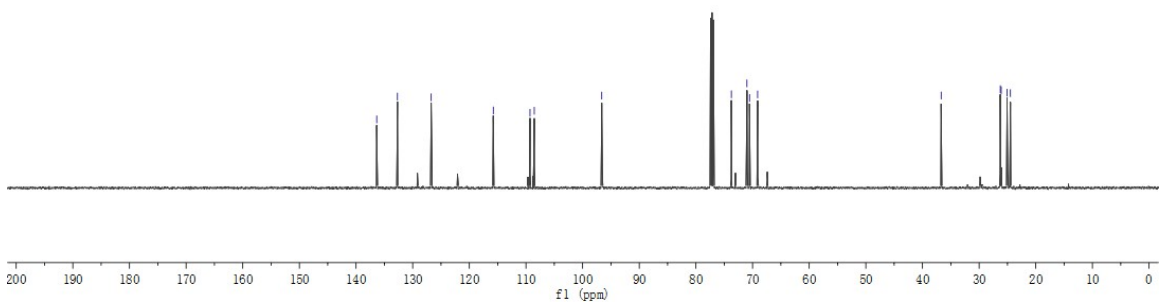

7.95  
7.94  
7.93  
7.93  
7.76  
7.75  
7.39  
7.38  
7.38  
7.36  
7.36  
7.34  
6.81  
6.79  
6.44  
6.42  
6.37  
5.93  
5.55  
5.53  
5.14  
5.14  
5.11  
5.11  
5.10  
3.99  
3.98  
3.96  
3.95  
3.00  
3.00  
2.99  
2.99  
2.98  
2.83  
2.81  
2.80  
2.78  
2.68  
2.67  
2.65  
2.64  
1.84  
1.84  
1.50  
1.48  
1.39  
1.38  
1.36

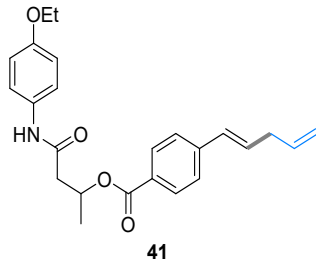

$^1\text{H NMR}$  (500 MHz,  $\text{CDCl}_3$ )

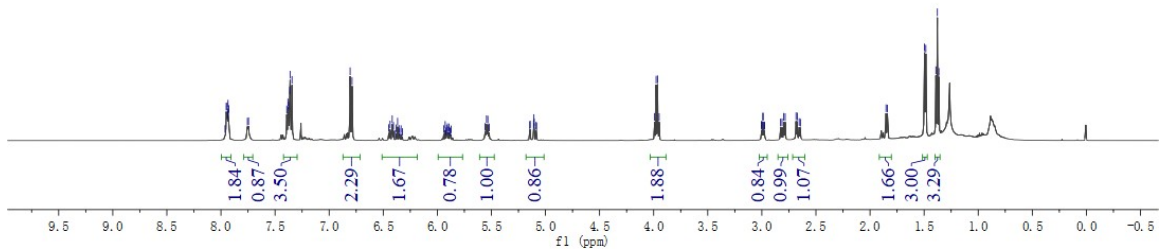

YYI-VE-18-53  
C13CPD CDCl3 E:\ \ CCY 3

167.77  
166.01  
155.94  
142.61  
142.46  
135.90  
132.63  
132.17  
131.69  
131.48  
130.83  
130.02  
130.00  
128.64  
128.58  
126.04  
122.00  
116.29  
114.83  
69.05  
63.76  
44.31  
37.16  
20.25  
14.92

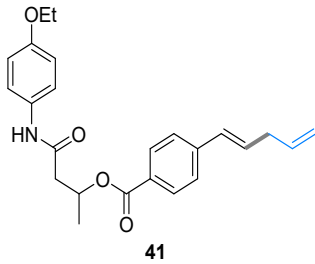

$^{13}\text{C NMR}$  (126 MHz,  $\text{CDCl}_3$ )

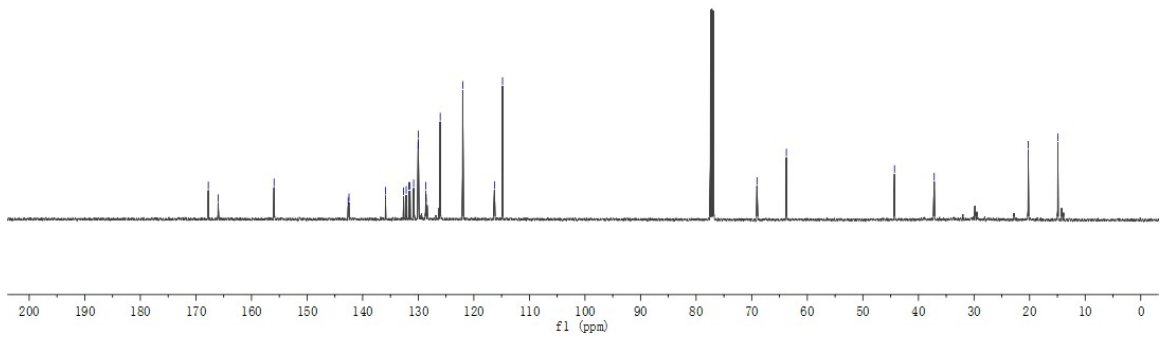

8.91  
8.90  
8.46  
8.38  
7.22  
7.20  
7.12  
7.11  
6.47  
6.44  
6.39  
6.38  
6.36  
6.35  
5.94  
5.92  
5.91  
5.89  
5.16  
5.15  
5.12  
5.12  
5.12  
5.10  
4.43  
4.42  
4.41  
4.40  
4.38  
4.36  
4.34  
4.32  
3.24  
3.22  
3.21  
3.01  
3.00  
2.99  
2.47  
2.46  
1.89  
1.88  
1.87  
1.85  
1.84  
1.41  
1.39  
0.92  
0.91

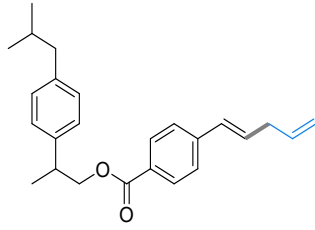

42

<sup>1</sup>H NMR (500 MHz, CDCl<sub>3</sub>)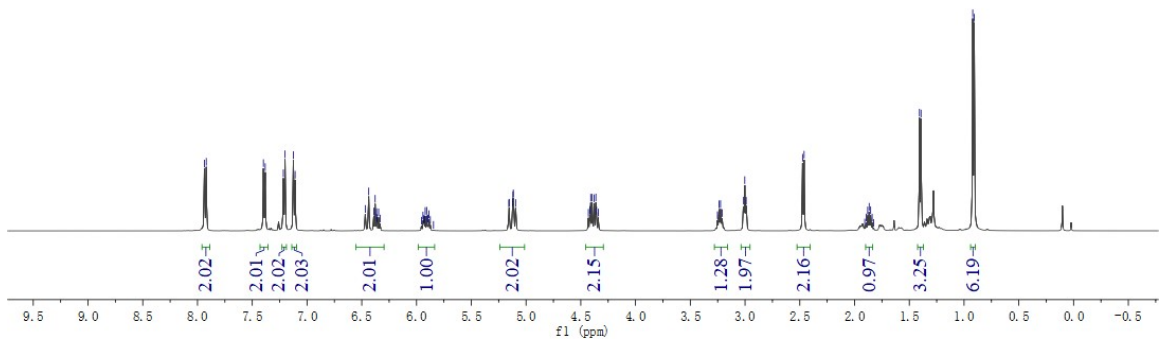

YXY-VE-18-66

C13CPD CDCl3 E:\ \ CCY 4

166.46  
142.17  
140.49  
140.15  
135.98  
131.20  
130.20  
129.99  
129.34  
128.87  
127.15  
125.97  
116.24

-70.07

45.16  
38.81  
37.17  
30.33  
22.52  
22.49  
18.17

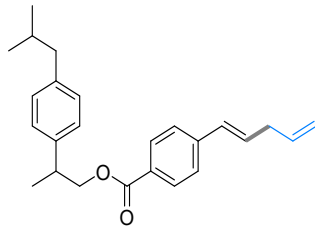

42

<sup>13</sup>C NMR (126 MHz, CDCl<sub>3</sub>)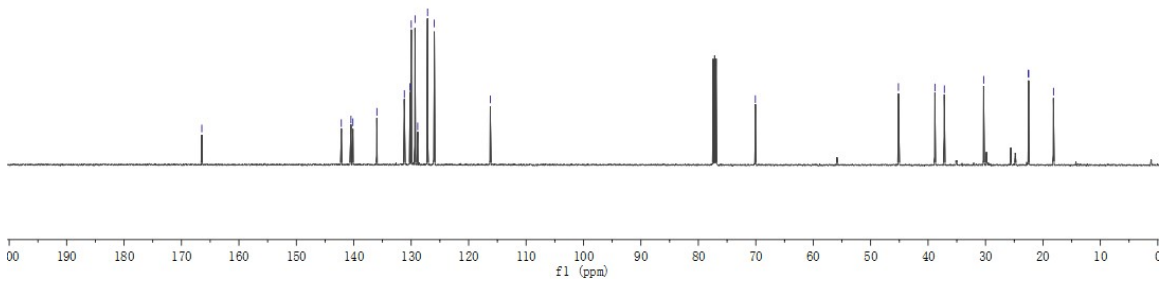

7.98  
7.96  
7.46  
7.38  
7.26  
6.43  
6.37  
5.14  
5.14  
5.11  
5.11  
5.10  
5.10  
5.08  
5.08  
4.83  
4.82  
3.01  
3.00  
2.99  
2.99  
2.98  
2.98  
2.03  
1.75  
1.52  
1.39  
1.37  
1.32  
1.31  
1.30  
1.30  
1.29  
1.29  
1.28  
1.26  
1.25  
1.24  
1.23  
1.22  
1.15  
1.14  
1.13  
1.13  
1.13  
1.12  
1.12  
0.87  
0.86  
0.85  
0.84

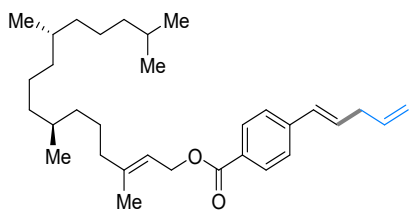

43

 $^1\text{H}$  NMR (500 MHz,  $\text{CDCl}_3$ )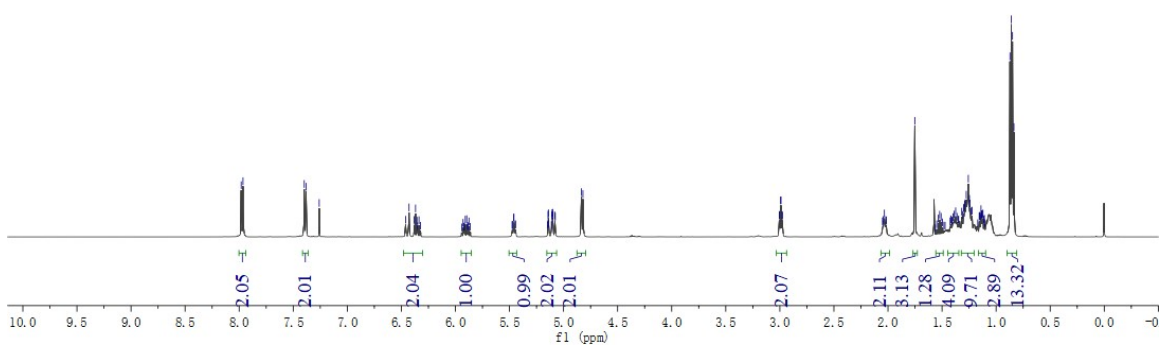

YXY-VE-18-62

C13CPD CDCl3 E:\ \ CCY 7

166.67  
142.88  
142.11  
136.03  
131.16  
130.26  
130.06  
129.06  
125.97  
118.37  
116.26  
61.98  
39.52  
37.58  
37.51  
37.44  
37.21  
32.93  
32.81  
28.12  
25.18  
24.94  
24.61  
22.87  
22.77  
19.89  
10.87

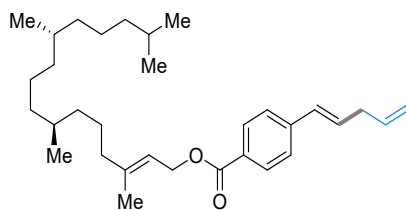

43

 $^{13}\text{C}$  NMR (126 MHz,  $\text{CDCl}_3$ )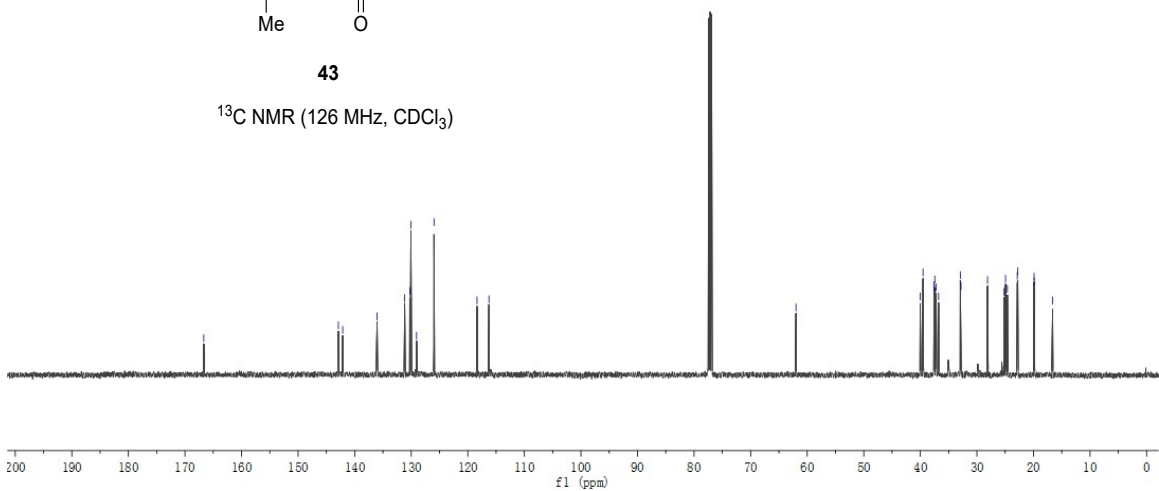

YXY-VE-18-59  
 PROTON CDCl3 E:\ \ CCY 6

8.66  
 7.95  
 7.93  
 7.40  
 7.38  
 7.26  
 7.09  
 7.08  
 7.01  
 6.89  
 6.88  
 5.56  
 5.55  
 5.54  
 4.35  
 4.35  
 4.33  
 4.32  
 3.79  
 3.18  
 2.86  
 2.84  
 2.83  
 2.82  
 2.69

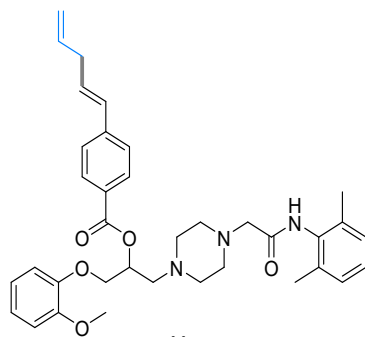

44

$^1\text{H}$  NMR (500 MHz,  $\text{CDCl}_3$ )

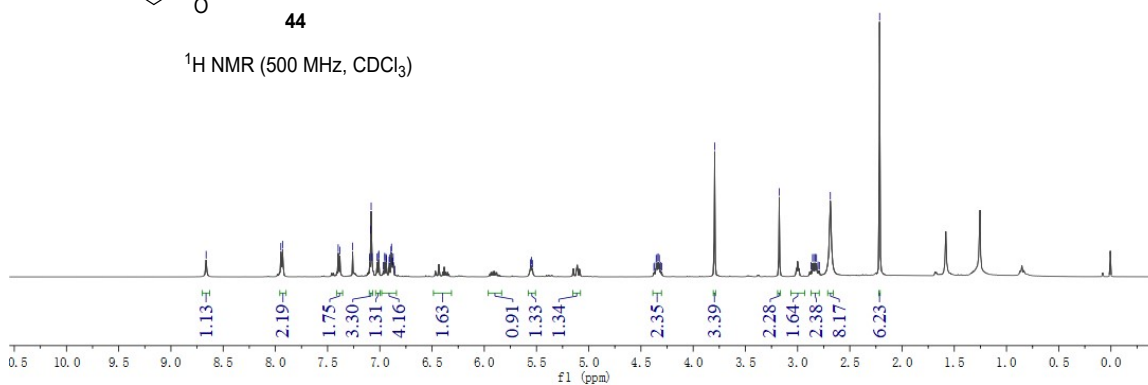

YXY-VE-18-59  
 C13CPD CDCl3 E:\ \ CCY 4

168.63  
 166.01  
 150.27  
 148.54  
 142.38  
 135.95  
 135.07  
 133.75  
 131.41  
 130.18  
 130.16  
 128.65  
 128.40  
 127.27  
 125.98  
 122.26  
 121.10  
 116.29  
 115.60  
 112.71

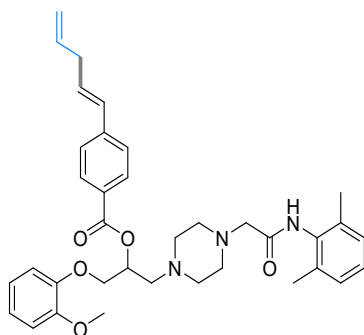

44

$^{13}\text{C}$  NMR (126 MHz,  $\text{CDCl}_3$ )

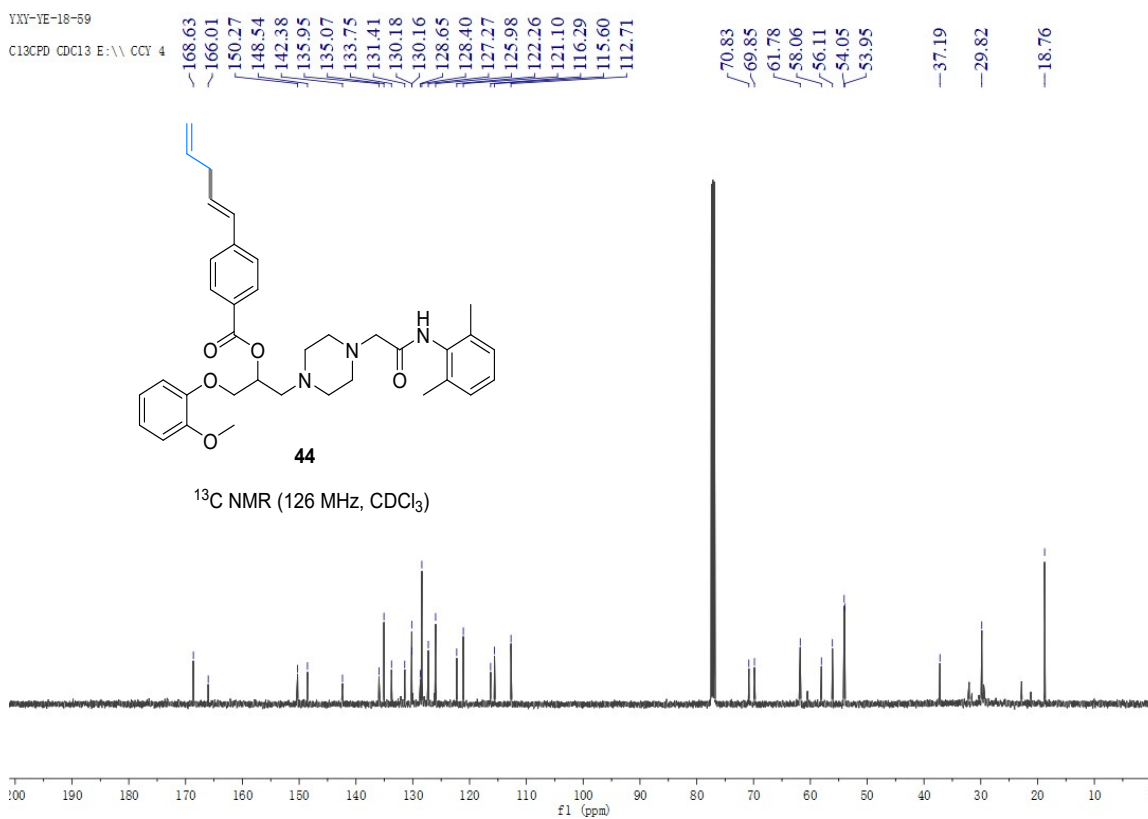

7.91  
7.96  
7.41  
7.39  
6.46  
6.43  
6.38  
6.37  
6.36  
6.34  
5.93  
5.91  
5.90  
5.88  
5.15  
5.14  
5.10  
5.08  
4.37  
4.36  
4.34  
4.33  
3.00  
2.99  
2.98  
2.05  
2.04  
2.02  
2.01  
1.99  
1.98  
1.85  
1.84  
1.82  
1.81  
1.80  
1.68  
1.61  
1.43  
1.42  
1.40  
1.39  
1.39  
1.28  
1.26  
1.25  
1.22  
0.98  
0.97

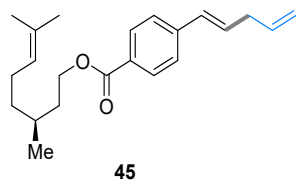

$^1\text{H}$  NMR (500 MHz,  $\text{CDCl}_3$ )

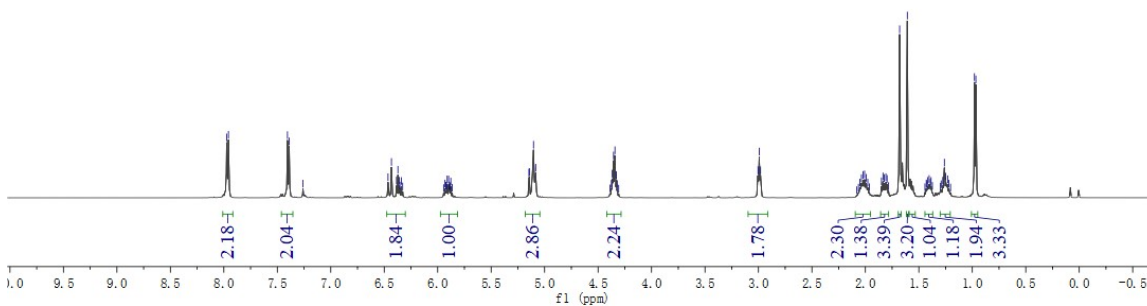

YXY-VE-28-47  
C13CPD CDCl3 E:\ \ CCY 3

166.63  
142.12  
135.99  
131.47  
131.16  
130.22  
129.97  
129.01  
125.97  
124.70  
116.24  
63.52  
37.18  
37.12  
35.65  
29.69  
25.83  
25.52  
19.64  
17.78

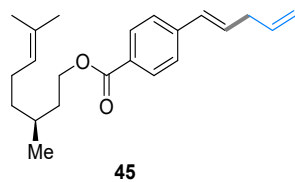

$^{13}\text{C}$  NMR (126 MHz,  $\text{CDCl}_3$ )

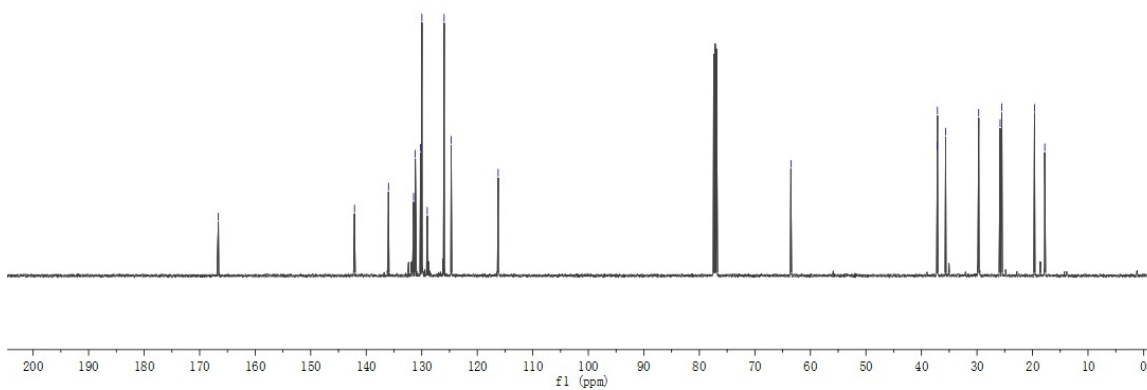



8.96  
8.94  
8.48  
8.39  
7.26  
6.46  
6.43  
6.39  
6.37  
6.36  
6.34  
5.93  
5.91  
5.87  
5.84  
5.14  
5.14  
5.11  
5.11  
5.10  
5.08  
5.08  
4.74  
4.74  
4.73  
4.70  
3.00  
2.99  
2.98  
2.18  
2.17  
2.17  
2.03  
2.00  
1.93  
1.91  
1.90  
1.89  
1.89  
1.89  
1.87  
1.87  
1.86  
1.75  
1.57  
1.55  
1.55  
1.53  
1.50

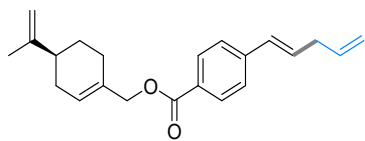

46

$^1\text{H NMR}$  (500 MHz,  $\text{CDCl}_3$ )

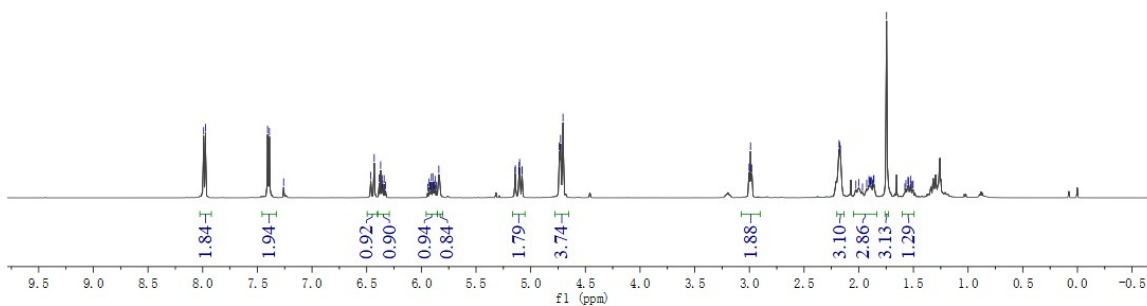

YXY-VE-28-46  
C13CPD CDCl3 E:\ \ CCY 2

166.43  
149.71  
142.21  
135.97  
132.86  
131.23  
130.20  
130.05  
128.85  
125.98  
125.67  
116.24  
108.91  
68.85  
40.99  
37.17  
35.04  
30.59  
27.46  
26.58

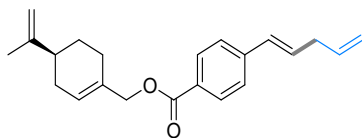

46

$^{13}\text{C NMR}$  (126 MHz,  $\text{CDCl}_3$ )

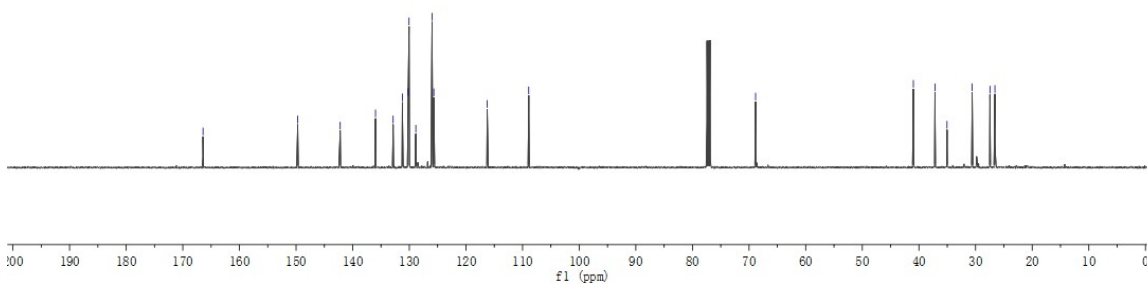

7.95  
7.95  
7.38  
7.38  
6.40  
6.34  
5.12  
5.08  
4.91  
2.96  
2.42  
2.40  
2.38  
2.06  
2.05  
2.02  
1.93  
1.92  
1.91  
1.82  
1.81  
1.80  
1.79  
1.77  
1.66  
1.66  
1.64  
1.63  
1.61  
1.53  
1.52  
1.50  
1.50  
1.49  
1.48  
1.47  
1.33  
1.32  
1.31  
1.31  
1.30  
1.30  
1.28  
1.08  
0.97  
0.87  
0.84

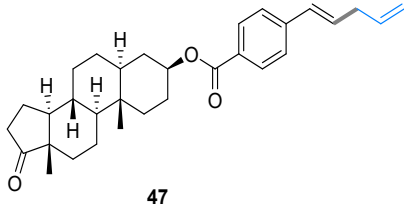

$^1\text{H}$  NMR (500 MHz,  $\text{CDCl}_3$ )

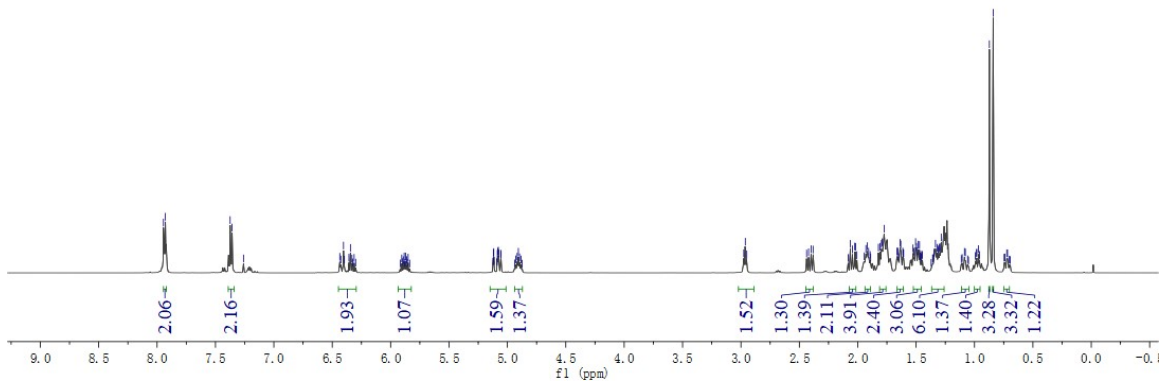

YXY-VE-18-61

C13CPD CDCl3 E:\ \ CCY 6

165.95  
141.96  
135.91  
132.27  
131.03  
130.14  
129.89  
129.27  
125.85  
116.18  
74.02  
54.36  
51.40  
47.81  
44.75  
37.11  
36.80  
35.89  
35.75  
35.09  
34.13  
31.59  
30.86  
30.32  
28.36  
27.59  
21.83  
20.53  
13.87  
12.33

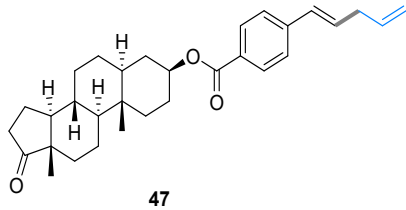

$^{13}\text{C}$  NMR (126 MHz,  $\text{CDCl}_3$ )

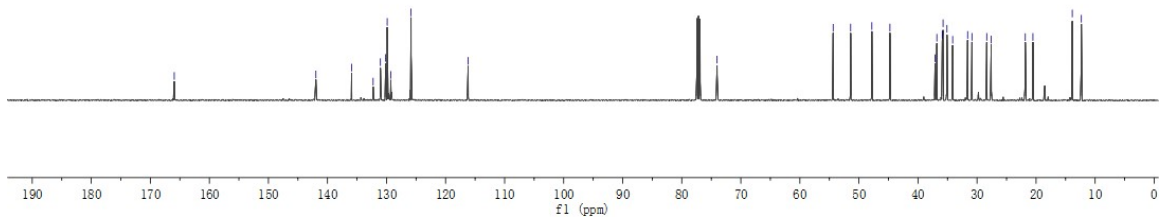

7.91  
7.96  
7.46  
7.38  
7.26  
6.46  
6.43  
6.37  
5.90  
5.89  
5.14  
5.13  
5.10  
5.10  
5.10  
5.08  
5.07  
4.74  
4.74  
4.73  
4.73  
4.32  
4.31  
4.30  
4.29  
4.29  
3.00  
2.99  
2.97  
2.86  
2.20  
2.19  
2.19  
1.89  
1.89  
1.89  
1.88  
1.88  
1.87  
1.87  
1.84  
1.67  
1.67  
1.63  
1.62  
1.57  
1.55  
1.17  
1.16  
0.88  
0.87  
0.85

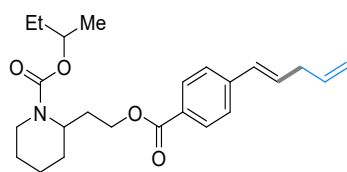

48

$^1\text{H NMR}$  (500 MHz,  $\text{CDCl}_3$ )

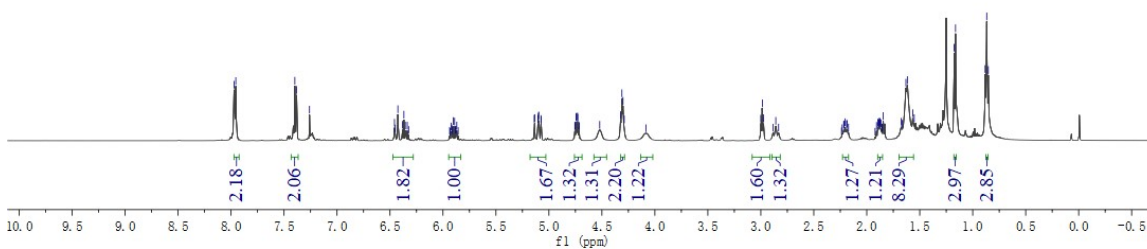

YXY-VE-18-49

C13CPD CDCl3 E:\ \ CCY 8

166.51  
155.66  
155.63  
142.20  
135.98  
131.23  
130.20  
130.03  
128.80  
125.97  
116.24  
73.07  
62.67  
62.64  
48.16  
48.13  
39.09  
37.18  
29.81  
29.19  
25.62  
19.90  
19.19  
9.86  
9.83

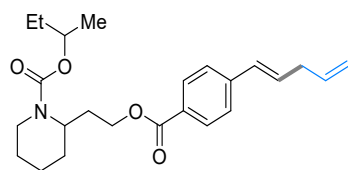

48

$^{13}\text{C NMR}$  (126 MHz,  $\text{CDCl}_3$ )

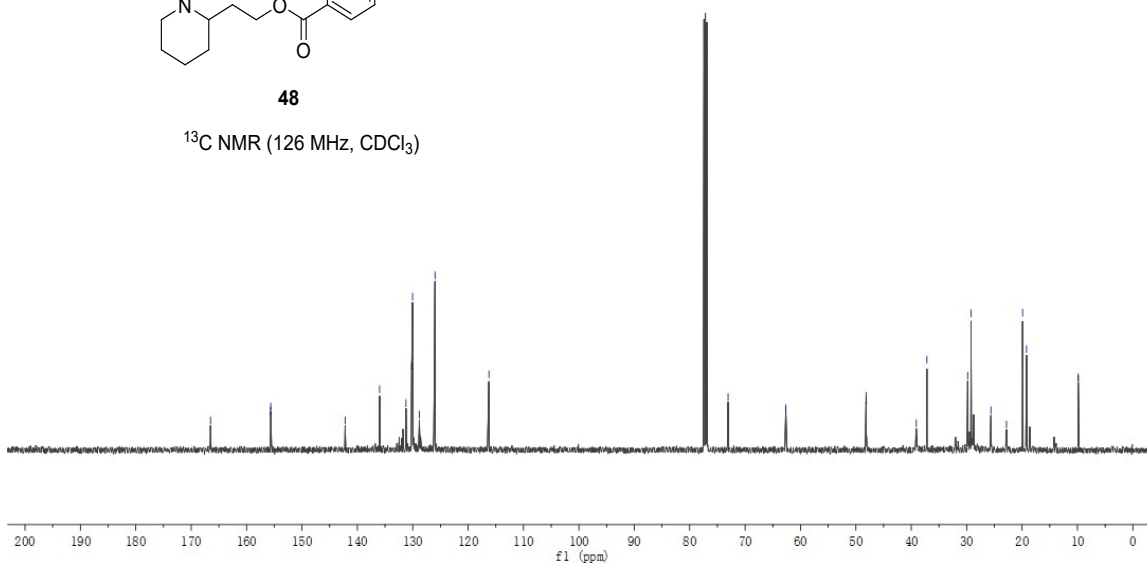

8.96  
8.96  
8.46  
8.46  
7.40  
7.39  
7.38  
7.38  
7.37  
7.32  
7.31  
7.30  
7.26  
7.22  
7.20  
7.17  
7.16  
6.83  
6.82  
6.62  
6.60  
6.47  
6.44  
6.40  
6.39  
6.37  
6.35  
5.92  
5.91  
5.16  
5.16  
5.13  
5.12  
5.12  
5.10  
5.10  
4.59  
4.58  
4.57  
4.18  
4.17  
4.16  
3.45  
3.43  
3.42  
3.02  
2.99  
2.96  
2.94  
2.93

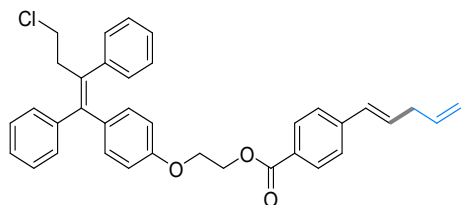

49

<sup>1</sup>H NMR (500 MHz, CDCl<sub>3</sub>)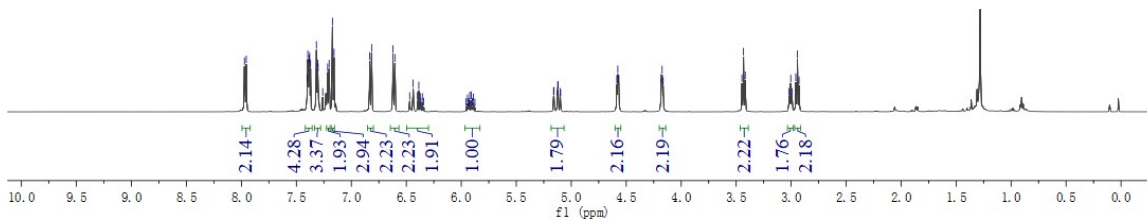

YXY-VE-18-48

C13CPD CDCl3 E:\ \ CCY 9

166.44  
156.88  
131.88  
130.17  
130.15  
129.65  
129.51  
128.48  
128.36  
125.99  
113.73  
65.89  
63.34  
42.96  
38.71  
37.18  
29.82

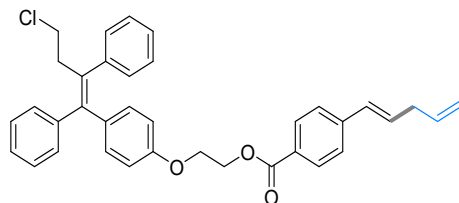

49

<sup>13</sup>C NMR (126 MHz, CDCl<sub>3</sub>)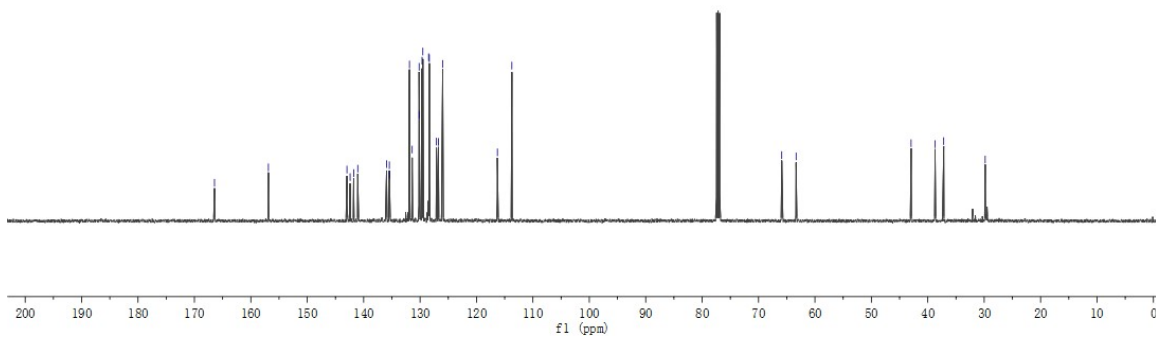

7.951  
7.947  
7.461  
7.381  
7.25  
6.15  
7.13  
7.12  
7.11  
7.10  
7.01  
6.99  
6.93  
6.91  
6.89  
6.87  
6.86  
6.84  
6.84  
6.46  
6.42  
6.38  
6.37  
5.92  
5.90  
5.89  
5.89  
5.14  
5.14  
5.10  
5.10  
5.08  
5.08  
4.43  
4.42  
4.41  
3.90  
3.89  
3.88  
3.88  
3.00  
2.99  
2.98  
2.78  
2.77  
2.76  
2.58  
2.49  
2.47  
2.46  
1.95  
1.94  
1.92

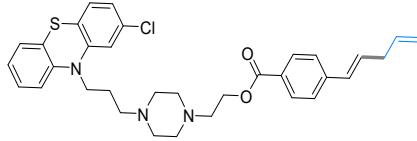

50

 $^1\text{H}$  NMR (500 MHz,  $\text{CDCl}_3$ )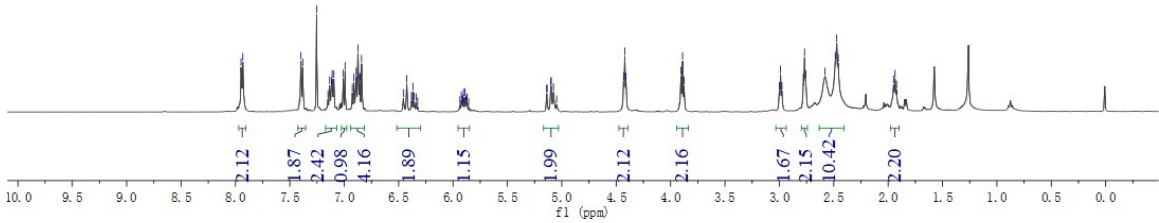

YXY-VE-18-68-1

C13CPD CDCl3 E:\ \ CCY 11

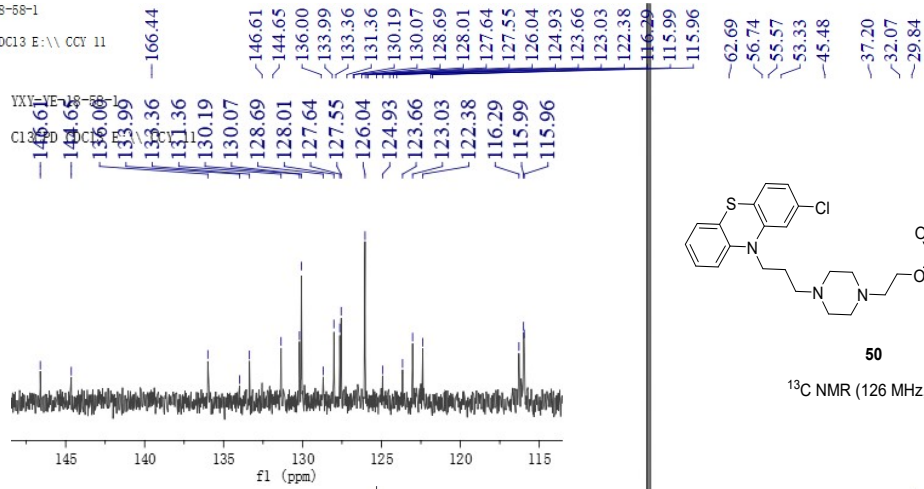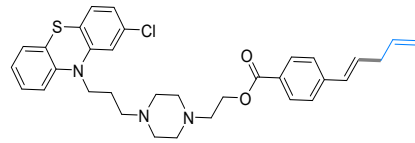

50

 $^{13}\text{C}$  NMR (126 MHz,  $\text{CDCl}_3$ )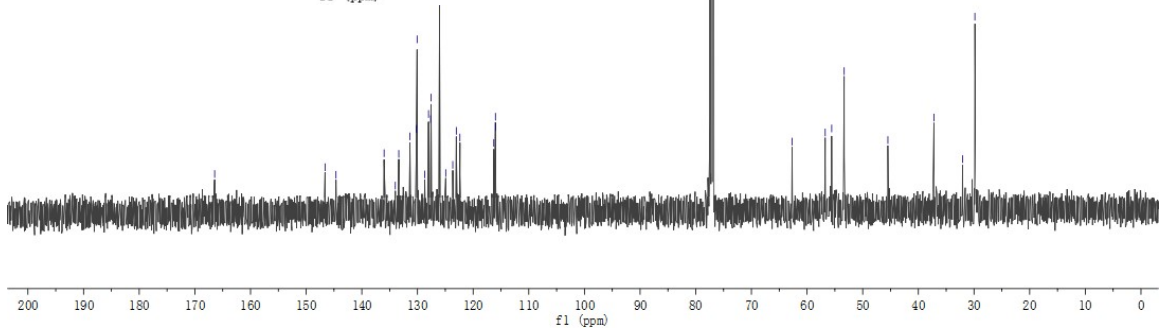

7.331  
7.300  
6.86  
6.85  
6.38  
6.35  
6.10  
6.06  
5.85  
5.83  
5.82  
5.80  
4.93  
4.92  
4.91  
4.89  
4.87  
4.84  
4.83  
4.83  
4.82  
4.61  
3.81  
2.96  
2.94  
2.04  
2.03  
2.01  
2.01  
1.72  
1.63  
1.62  
1.62  
1.62  
1.58  
1.51  
1.51  
1.50  
1.49  
1.48  
1.48  
1.47  
1.46  
1.45  
1.44  
1.02

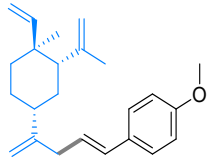**51**<sup>1</sup>H NMR (500 MHz, CDCl<sub>3</sub>)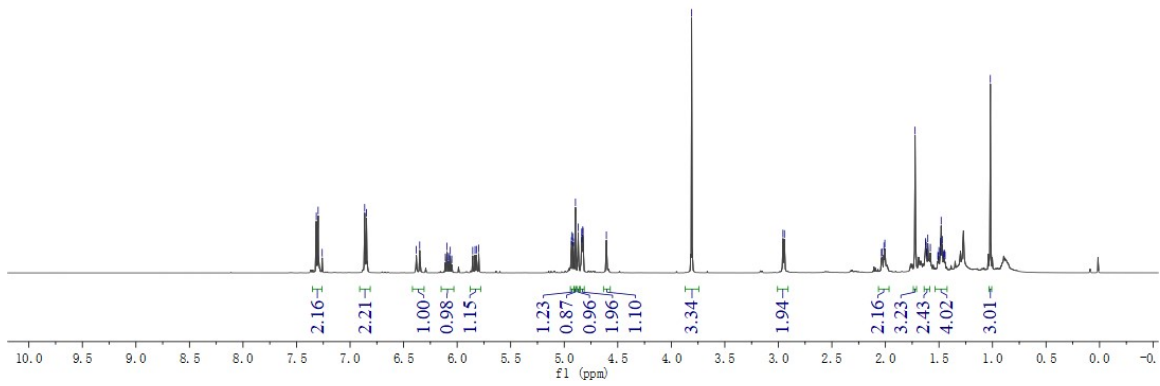

YE-17-30

C13CPD CDCl3 E:\ \ CCY 27

158.92  
153.40  
150.38  
147.81

130.81  
130.65  
127.27  
126.63  
114.06  
112.26  
110.01  
108.76

55.41  
52.90  
44.30  
40.09  
39.98  
38.83  
33.36  
27.33  
24.93  
16.76

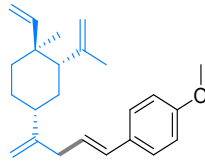**51**<sup>13</sup>C NMR (126 MHz, CDCl<sub>3</sub>)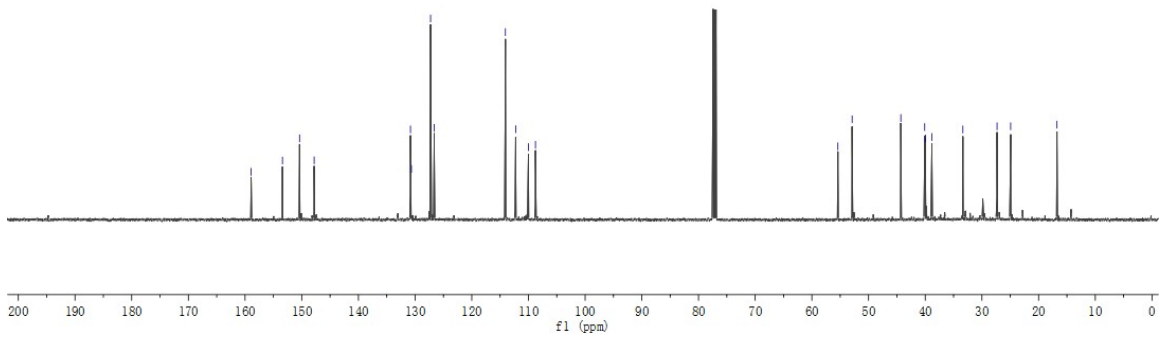

7.64  
7.64  
7.63  
7.26  
6.70  
6.69  
6.35  
6.32  
6.11  
6.10  
6.08  
5.84  
5.82  
5.81  
5.78  
4.92  
4.92  
4.91  
4.90  
4.88  
4.87  
4.82  
4.82  
4.80  
4.80  
4.59  
3.93  
2.96  
2.94  
2.02  
2.02  
2.00  
1.99  
1.98  
1.71  
1.61  
1.60  
1.60  
1.60  
1.59  
1.56  
1.49  
1.47  
1.47  
1.46  
1.45  
1.44  
1.43  
1.01

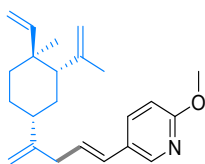**52**<sup>1</sup>H NMR (500 MHz, CDCl<sub>3</sub>)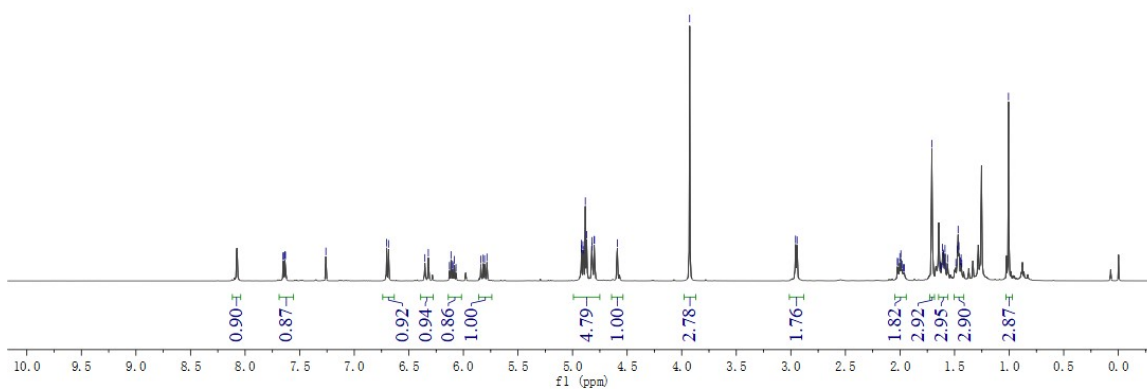

YE-28-1

C13CPD CDCl3 E:\ \ CCY 11

163.43  
153.06  
150.32  
147.77  
145.08  
135.54  
128.25  
127.52  
126.97  
112.29  
110.93  
110.07  
109.01  
53.61  
52.90  
44.41  
40.07  
39.97  
38.83  
33.37  
27.32  
24.93  
16.76

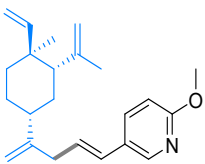**52**<sup>13</sup>C NMR (126 MHz, CDCl<sub>3</sub>)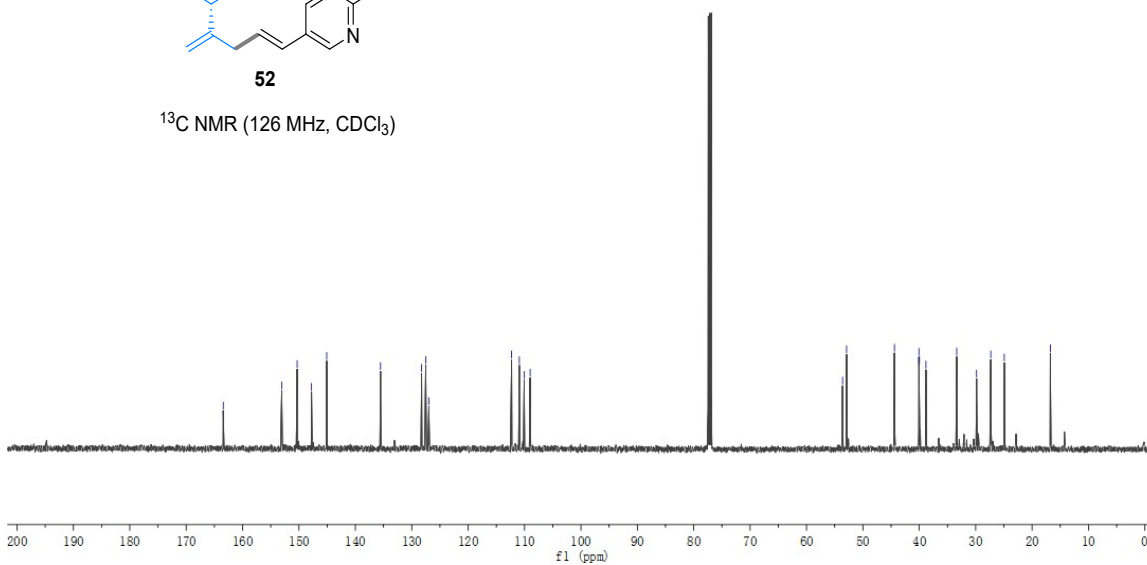

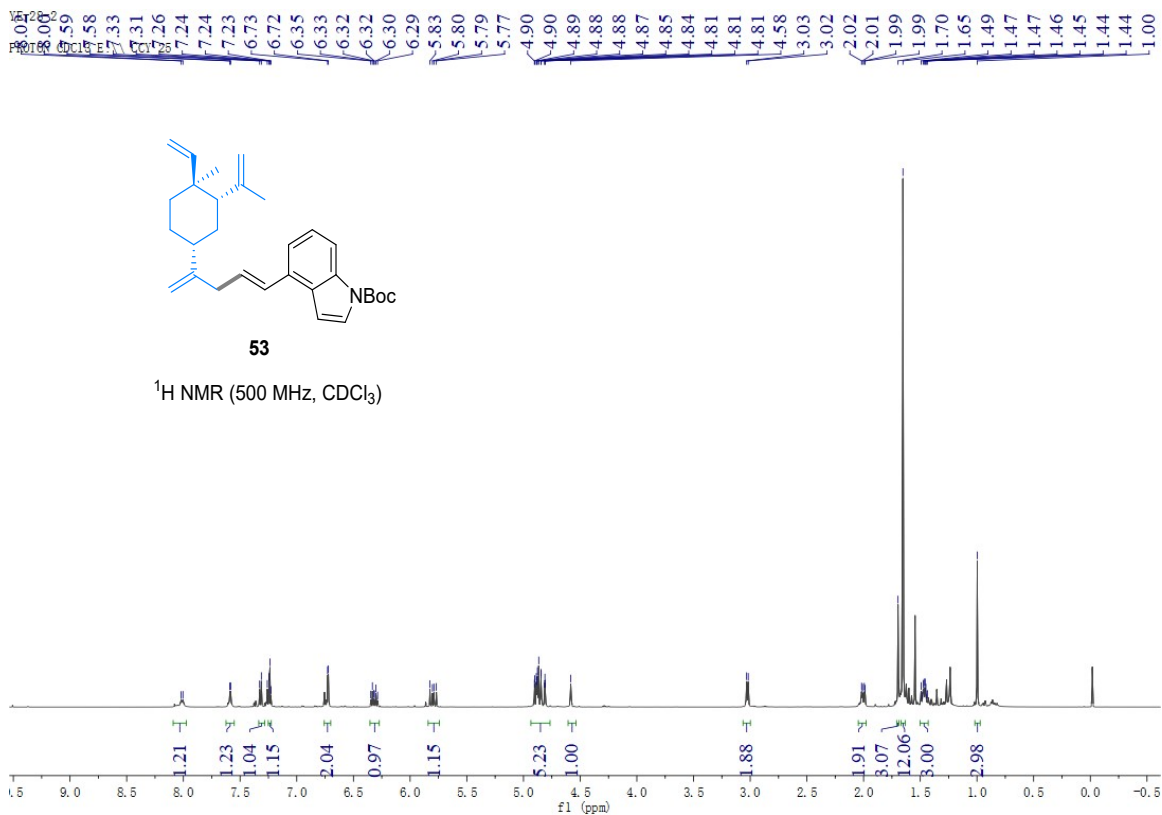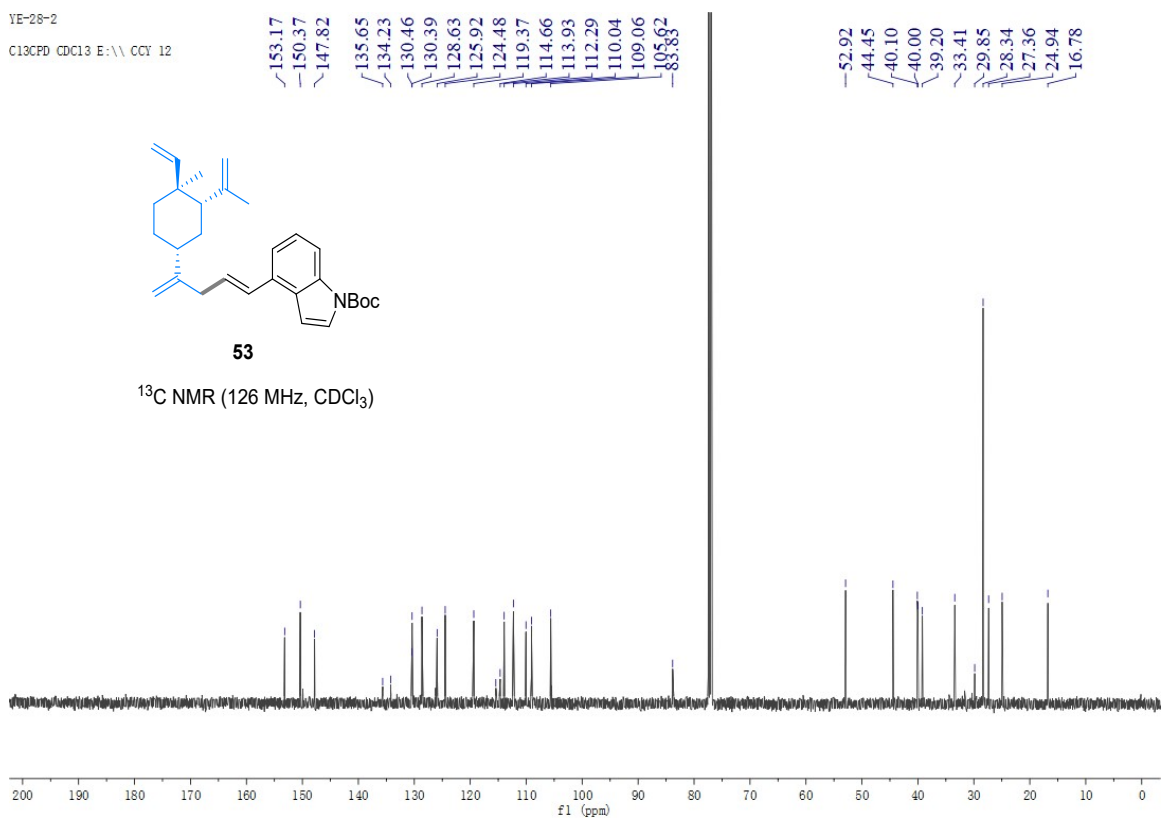



7.76  
7.75  
7.48  
7.47  
7.42  
7.26  
6.46  
6.43  
6.37  
6.35  
6.34  
6.32  
5.84  
5.82  
5.81  
5.79  
4.92  
4.91  
4.91  
4.89  
4.89  
4.83  
4.82  
4.59  
2.99  
2.98  
2.04  
2.03  
2.02  
2.01  
2.00  
1.71  
1.64  
1.63  
1.63  
1.62  
1.61  
1.61  
1.60  
1.60  
1.59  
1.58  
1.57  
1.50  
1.49  
1.47  
1.47  
1.45  
1.45  
1.44  
1.01

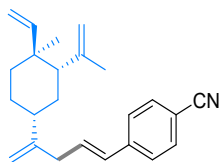

54

 $^1\text{H}$  NMR (500 MHz,  $\text{CDCl}_3$ )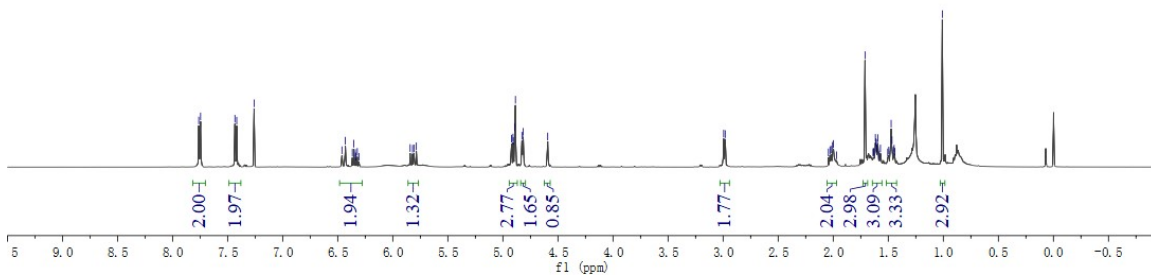

YXY-VE-28-13

C13CPD CDCl3 E:\ \ CCY 11

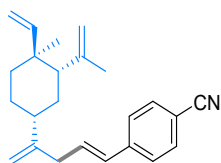

54

 $^{13}\text{C}$  NMR (126 MHz,  $\text{CDCl}_3$ )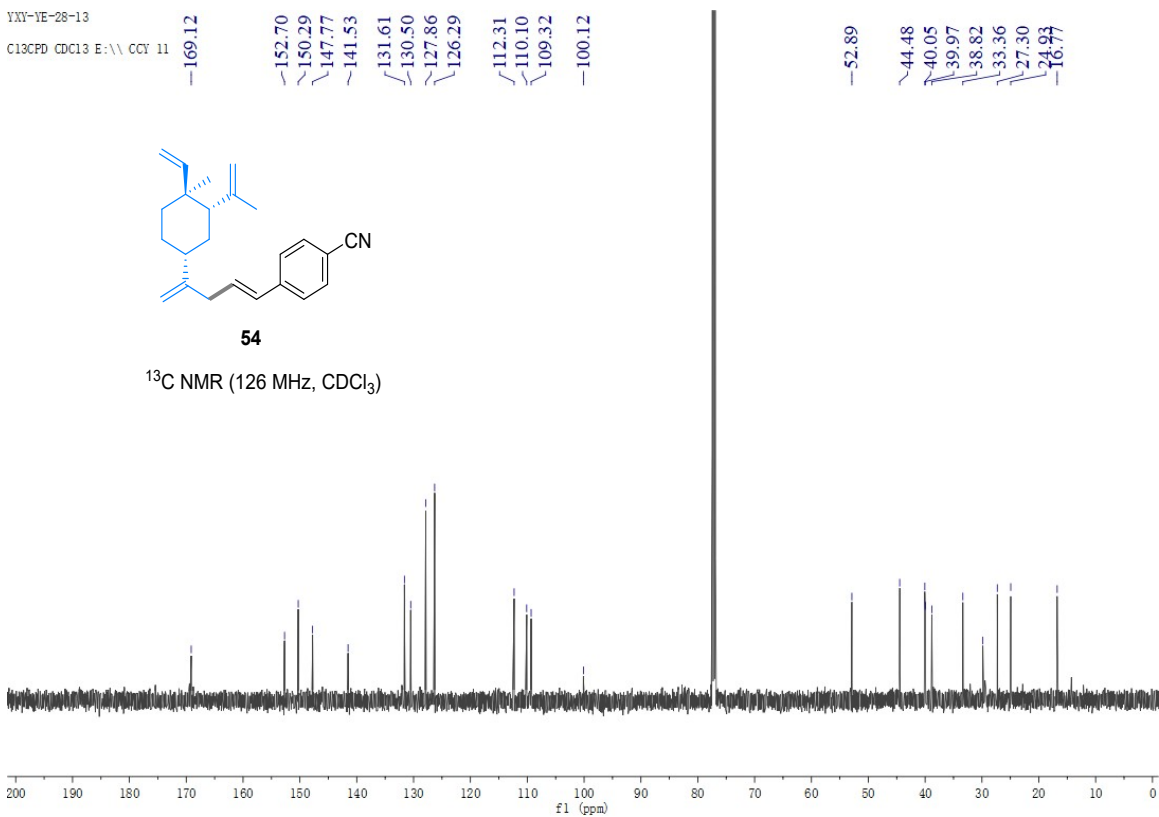

8.51  
8.16  
7.62  
7.60  
7.49  
7.48  
7.26  
6.46  
6.43  
6.32  
6.30  
6.29  
6.27  
5.85  
5.82  
5.81  
5.79  
5.79  
4.93  
4.92  
4.91  
4.91  
4.90  
4.89  
4.83  
4.83  
4.60  
3.00  
2.99  
2.04  
2.04  
2.03  
2.03  
2.01  
2.00  
1.71  
1.62  
1.62  
1.62  
1.61  
1.61  
1.60  
1.59  
1.51  
1.50  
1.48  
1.47  
1.46  
1.46  
1.45  
1.45  
1.01

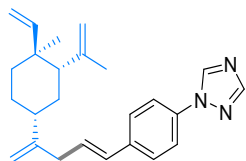

55

<sup>1</sup>H NMR (500 MHz, CDCl<sub>3</sub>)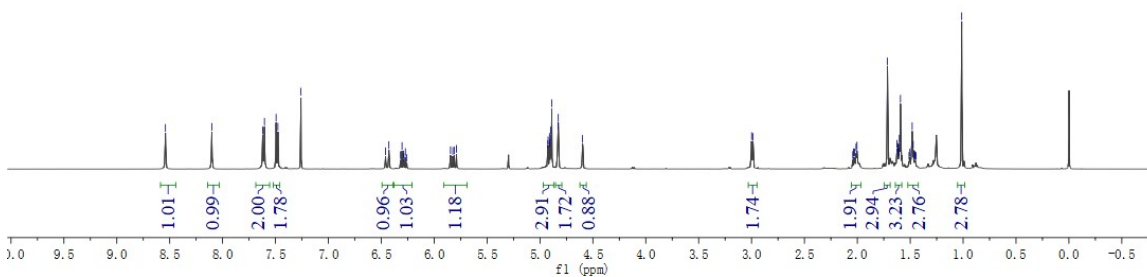

YXY-VE-28-4

C13CPD CDCl3 E:\ \ CCY 1

152.81  
152.68  
150.29  
147.77  
140.84  
137.95  
135.73  
130.55  
130.06  
127.38  
120.29  
112.32  
110.11  
109.26  
52.90  
44.49  
40.06  
39.98  
38.78  
33.37  
27.32  
24.94  
16.77

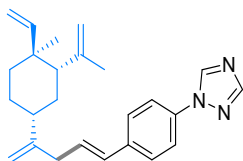

55

<sup>13</sup>C NMR (126 MHz, CDCl<sub>3</sub>)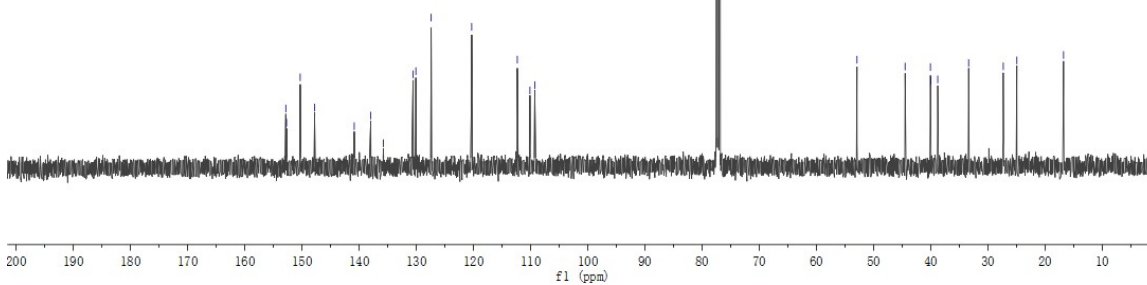

7.95  
7.94  
7.46  
7.39  
7.38  
7.38  
7.36  
7.31  
7.30  
7.21  
7.20  
7.17  
7.15  
6.83  
6.81  
6.62  
6.60  
4.94  
4.92  
4.91  
4.90  
4.84  
4.83  
4.61  
4.58  
4.57  
4.56  
4.18  
4.17  
4.16  
3.44  
3.43  
3.41  
3.01  
2.99  
2.95  
2.94  
2.92  
2.02  
1.73  
1.63  
1.63  
1.62  
1.49  
1.48  
1.47  
1.46  
1.46  
1.03

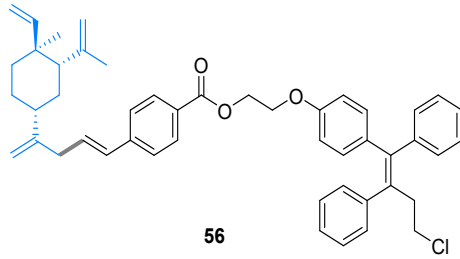

$^1\text{H NMR}$  (500 MHz,  $\text{CDCl}_3$ )

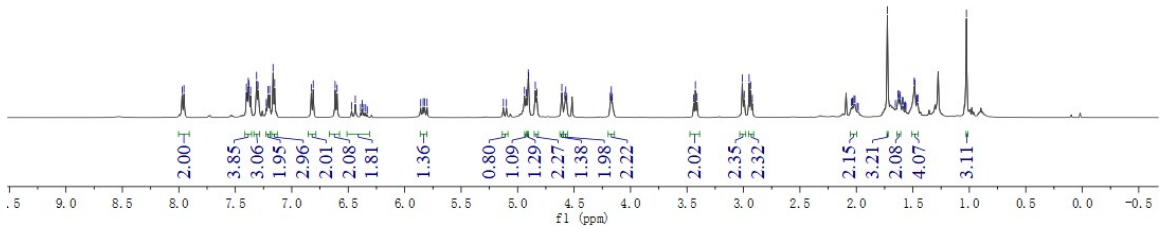

YXY-VE-28-10

C13CPD CDCl3 E:\ \ CCY 33

166.44  
150.24  
131.86  
130.16  
129.63  
129.49  
128.46  
128.34  
127.07  
126.73  
125.98  
113.13  
112.29  
110.07  
109.33  
79.52  
65.88  
63.33  
52.83  
44.43  
42.93  
41.65  
40.00  
39.93  
38.80  
38.69  
33.31  
29.81  
27.26  
24.92

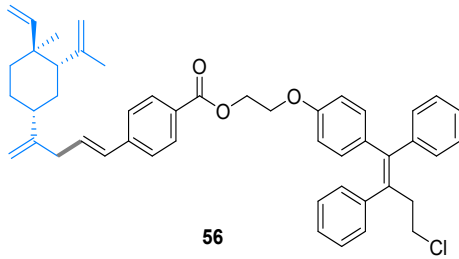

$^{13}\text{C NMR}$  (126 MHz,  $\text{CDCl}_3$ )

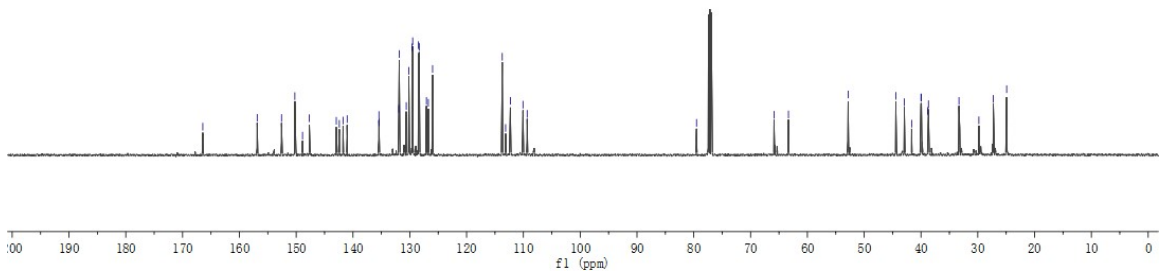

8.96  
8.94  
8.48  
8.39  
7.26  
6.89  
4.84  
4.83  
4.82  
4.60  
3.00  
2.05  
2.03  
2.02  
1.75  
1.71  
1.62  
1.61  
1.61  
1.60  
1.60  
1.57  
1.52  
1.51  
1.50  
1.48  
1.47  
1.46  
1.45  
1.44  
1.16  
1.16  
1.15  
1.14  
1.14  
1.13  
1.12  
1.11  
1.09  
1.07  
1.07  
1.07  
1.05  
1.04  
1.01  
0.87  
0.86  
0.85

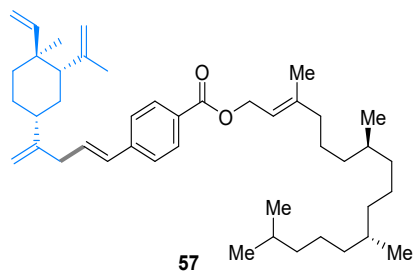

$^1\text{H NMR}$  (500 MHz,  $\text{CDCl}_3$ )

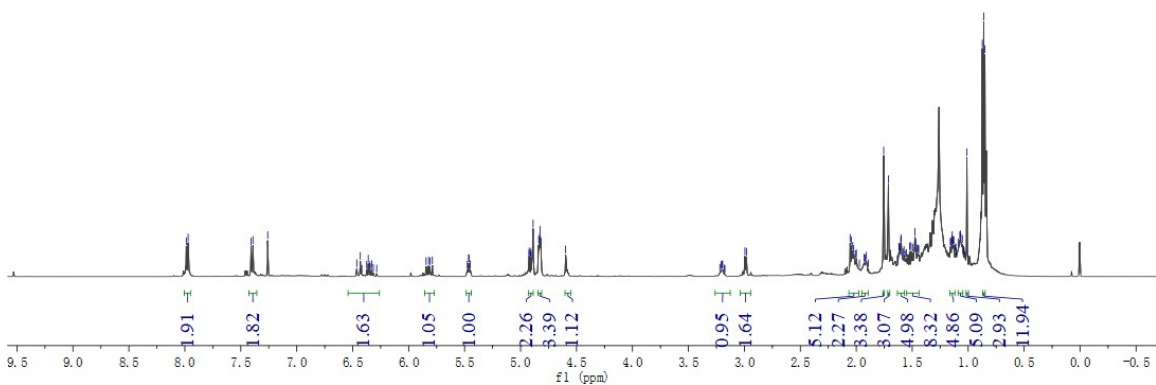

YXY-VE-28-11  
C13CPD CDCl3 E:\ \ CCY 9

166.66  
152.68  
150.29  
147.74  
142.87  
142.13  
131.69  
130.74  
130.07  
129.03  
125.98  
118.37  
112.31  
110.08  
109.32  
61.98  
55.89  
52.88  
39.52  
37.57  
37.44  
32.93  
32.81  
28.12  
24.94  
24.61  
22.86  
22.77  
19.89  
10.66

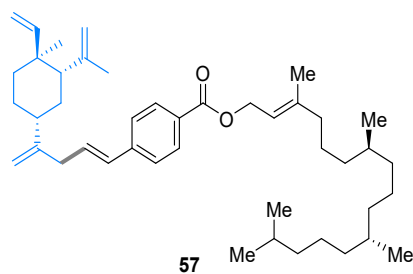

$^{13}\text{C NMR}$  (126 MHz,  $\text{CDCl}_3$ )

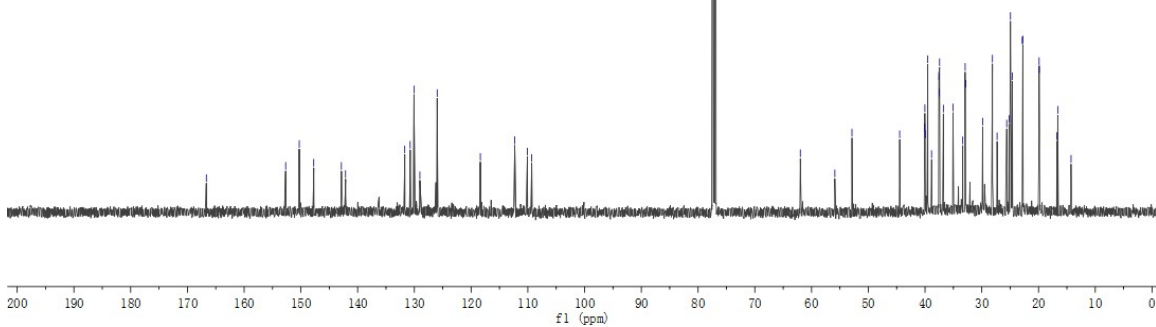

8.92  
8.91  
8.90  
8.89  
8.88  
8.87  
8.86  
8.85  
8.84  
8.83  
8.82  
8.81  
8.80  
8.79  
8.78  
8.77  
8.76  
8.75  
8.74  
8.73  
8.72  
8.71  
8.70  
8.69  
8.68  
8.67  
8.66  
8.65  
8.64  
8.63  
8.62  
8.61  
8.60  
8.59  
8.58  
8.57  
8.56  
8.55  
8.54  
8.53  
8.52  
8.51  
8.50  
8.49  
8.48  
8.47  
8.46  
8.45  
8.44  
8.43  
8.42  
8.41  
8.40  
8.39  
8.38  
8.37  
8.36  
8.35  
8.34  
8.33  
8.32  
8.31  
8.30  
8.29  
8.28  
8.27  
8.26  
8.25  
8.24  
8.23  
8.22  
8.21  
8.20  
8.19  
8.18  
8.17  
8.16  
8.15  
8.14  
8.13  
8.12  
8.11  
8.10  
8.09  
8.08  
8.07  
8.06  
8.05  
8.04  
8.03  
8.02  
8.01  
8.00  
7.99  
7.98  
7.97  
7.96  
7.95  
7.94  
7.93  
7.92  
7.91  
7.90  
7.89  
7.88  
7.87  
7.86  
7.85  
7.84  
7.83  
7.82  
7.81  
7.80  
7.79  
7.78  
7.77  
7.76  
7.75  
7.74  
7.73  
7.72  
7.71  
7.70  
7.69  
7.68  
7.67  
7.66  
7.65  
7.64  
7.63  
7.62  
7.61  
7.60  
7.59  
7.58  
7.57  
7.56  
7.55  
7.54  
7.53  
7.52  
7.51  
7.50  
7.49  
7.48  
7.47  
7.46  
7.45  
7.44  
7.43  
7.42  
7.41  
7.40  
7.39  
7.38  
7.37  
7.36  
7.35  
7.34  
7.33  
7.32  
7.31  
7.30  
7.29  
7.28  
7.27  
7.26  
7.25  
7.24  
7.23  
7.22  
7.21  
7.20  
7.19  
7.18  
7.17  
7.16  
7.15  
7.14  
7.13  
7.12  
7.11  
7.10  
7.09  
7.08  
7.07  
7.06  
7.05  
7.04  
7.03  
7.02  
7.01  
7.00  
6.99  
6.98  
6.97  
6.96  
6.95  
6.94  
6.93  
6.92  
6.91  
6.90  
6.89  
6.88  
6.87  
6.86  
6.85  
6.84  
6.83  
6.82  
6.81  
6.80  
6.79  
6.78  
6.77  
6.76  
6.75  
6.74  
6.73  
6.72  
6.71  
6.70  
6.69  
6.68  
6.67  
6.66  
6.65  
6.64  
6.63  
6.62  
6.61  
6.60  
6.59  
6.58  
6.57  
6.56  
6.55  
6.54  
6.53  
6.52  
6.51  
6.50  
6.49  
6.48  
6.47  
6.46  
6.45  
6.44  
6.43  
6.42  
6.41  
6.40  
6.39  
6.38  
6.37  
6.36  
6.35  
6.34  
6.33  
6.32  
6.31  
6.30  
6.29  
6.28  
6.27  
6.26  
6.25  
6.24  
6.23  
6.22  
6.21  
6.20  
6.19  
6.18  
6.17  
6.16  
6.15  
6.14  
6.13  
6.12  
6.11  
6.10  
6.09  
6.08  
6.07  
6.06  
6.05  
6.04  
6.03  
6.02  
6.01  
6.00  
5.99  
5.98  
5.97  
5.96  
5.95  
5.94  
5.93  
5.92  
5.91  
5.90  
5.89  
5.88  
5.87  
5.86  
5.85  
5.84  
5.83  
5.82  
5.81  
5.80  
5.79  
5.78  
5.77  
5.76  
5.75  
5.74  
5.73  
5.72  
5.71  
5.70  
5.69  
5.68  
5.67  
5.66  
5.65  
5.64  
5.63  
5.62  
5.61  
5.60  
5.59  
5.58  
5.57  
5.56  
5.55  
5.54  
5.53  
5.52  
5.51  
5.50  
5.49  
5.48  
5.47  
5.46  
5.45  
5.44  
5.43  
5.42  
5.41  
5.40  
5.39  
5.38  
5.37  
5.36  
5.35  
5.34  
5.33  
5.32  
5.31  
5.30  
5.29  
5.28  
5.27  
5.26  
5.25  
5.24  
5.23  
5.22  
5.21  
5.20  
5.19  
5.18  
5.17  
5.16  
5.15  
5.14  
5.13  
5.12  
5.11  
5.10  
5.09  
5.08  
5.07  
5.06  
5.05  
5.04  
5.03  
5.02  
5.01  
5.00  
4.99  
4.98  
4.97  
4.96  
4.95  
4.94  
4.93  
4.92  
4.91  
4.90  
4.89  
4.88  
4.87  
4.86  
4.85  
4.84  
4.83  
4.82  
4.81  
4.80  
4.79  
4.78  
4.77  
4.76  
4.75  
4.74  
4.73  
4.72  
4.71  
4.70  
4.69  
4.68  
4.67  
4.66  
4.65  
4.64  
4.63  
4.62  
4.61  
4.60  
4.59  
4.58  
4.57  
4.56  
4.55  
4.54  
4.53  
4.52  
4.51  
4.50  
4.49  
4.48  
4.47  
4.46  
4.45  
4.44  
4.43  
4.42  
4.41  
4.40  
4.39  
4.38  
4.37  
4.36  
4.35  
4.34  
4.33  
4.32  
4.31  
4.30  
4.29  
4.28  
4.27  
4.26  
4.25  
4.24  
4.23  
4.22  
4.21  
4.20  
4.19  
4.18  
4.17  
4.16  
4.15  
4.14  
4.13  
4.12  
4.11  
4.10  
4.09  
4.08  
4.07  
4.06  
4.05  
4.04  
4.03  
4.02  
4.01  
4.00  
3.99  
3.98  
3.97  
3.96  
3.95  
3.94  
3.93  
3.92  
3.91  
3.90  
3.89  
3.88  
3.87  
3.86  
3.85  
3.84  
3.83  
3.82  
3.81  
3.80  
3.79  
3.78  
3.77  
3.76  
3.75  
3.74  
3.73  
3.72  
3.71  
3.70  
3.69  
3.68  
3.67  
3.66  
3.65  
3.64  
3.63  
3.62  
3.61  
3.60  
3.59  
3.58  
3.57  
3.56  
3.55  
3.54  
3.53  
3.52  
3.51  
3.50  
3.49  
3.48  
3.47  
3.46  
3.45  
3.44  
3.43  
3.42  
3.41  
3.40  
3.39  
3.38  
3.37  
3.36  
3.35  
3.34  
3.33  
3.32  
3.31  
3.30  
3.29  
3.28  
3.27  
3.26  
3.25  
3.24  
3.23  
3.22  
3.21  
3.20  
3.19  
3.18  
3.17  
3.16  
3.15  
3.14  
3.13  
3.12  
3.11  
3.10  
3.09  
3.08  
3.07  
3.06  
3.05  
3.04  
3.03  
3.02  
3.01  
3.00  
2.99  
2.98  
2.97  
2.96  
2.95  
2.94  
2.93  
2.92  
2.91  
2.90  
2.89  
2.88  
2.87  
2.86  
2.85  
2.84  
2.83  
2.82  
2.81  
2.80  
2.79  
2.78  
2.77  
2.76  
2.75  
2.74  
2.73  
2.72  
2.71  
2.70  
2.69  
2.68  
2.67  
2.66  
2.65  
2.64  
2.63  
2.62  
2.61  
2.60  
2.59  
2.58  
2.57  
2.56  
2.55  
2.54  
2.53  
2.52  
2.51  
2.50  
2.49  
2.48  
2.47  
2.46  
2.45  
2.44  
2.43  
2.42  
2.41  
2.40  
2.39  
2.38  
2.37  
2.36  
2.35  
2.34  
2.33  
2.32  
2.31  
2.30  
2.29  
2.28  
2.27  
2.26  
2.25  
2.24  
2.23  
2.22  
2.21  
2.20  
2.19  
2.18  
2.17  
2.16  
2.15  
2.14  
2.13  
2.12  
2.11  
2.10  
2.09  
2.08  
2.07  
2.06  
2.05  
2.04  
2.03  
2.02  
2.01  
2.00  
1.99  
1.98  
1.97  
1.96  
1.95  
1.94  
1.93  
1.92  
1.91  
1.90  
1.89  
1.88  
1.87  
1.86  
1.85  
1.84  
1.83  
1.82  
1.81  
1.80  
1.79  
1.78  
1.77  
1.76  
1.75  
1.74  
1.73  
1.72  
1.71  
1.70  
1.69  
1.68  
1.67  
1.66  
1.65  
1.64  
1.63  
1.62  
1.61  
1.60  
1.59  
1.58  
1.57  
1.56  
1.55  
1.54  
1.53  
1.52  
1.51  
1.50  
1.49  
1.48  
1.47  
1.46  
1.45  
1.44  
1.43  
1.42  
1.41  
1.40  
1.39  
1.38  
1.37  
1.36  
1.35  
1.34  
1.33  
1.32  
1.31  
1.30  
1.29  
1.28  
1.27  
1.26  
1.25  
1.24  
1.23  
1.22  
1.21  
1.20  
1.19  
1.18  
1.17  
1.16  
1.15  
1.14  
1.13  
1.12  
1.11  
1.10  
1.09  
1.08  
1.07  
1.06  
1.05  
1.04  
1.03  
1.02  
1.01  
1.00  
0.99  
0.98  
0.97  
0.96  
0.95  
0.94  
0.93  
0.92  
0.91  
0.90  
0.89  
0.88  
0.87  
0.86  
0.85  
0.84  
0.83  
0.82  
0.81  
0.80  
0.79  
0.78  
0.77  
0.76  
0.75  
0.74  
0.73  
0.72  
0.71  
0.70  
0.69  
0.68  
0.67  
0.66  
0.65  
0.64  
0.63  
0.62  
0.61  
0.60  
0.59  
0.58  
0.57  
0.56  
0.55  
0.54  
0.53  
0.52  
0.51  
0.50  
0.49  
0.48  
0.47  
0.46  
0.45  
0.44  
0.43  
0.42  
0.41  
0.40  
0.39  
0.38  
0.37  
0.36  
0.35  
0.34  
0.33  
0.32  
0.31  
0.30  
0.29  
0.28  
0.27  
0.26  
0.25  
0.24  
0.23  
0.22  
0.21  
0.20  
0.19  
0.18  
0.17  
0.16  
0.15  
0.14  
0.13  
0.12  
0.11  
0.10  
0.09  
0.08  
0.07  
0.06  
0.05  
0.04  
0.03  
0.02  
0.01  
0.00

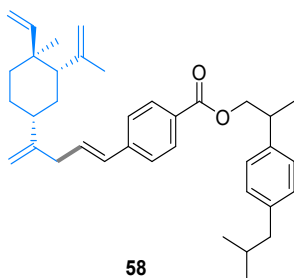

$^1\text{H}$  NMR (500 MHz,  $\text{CDCl}_3$ )

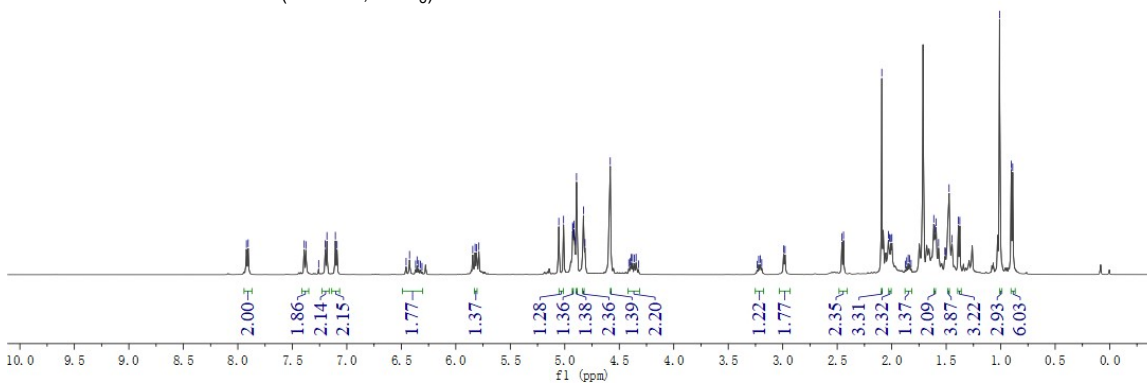

YXY-VE-28-9

C13CPD CDCl3 E:\ \ CCY 32

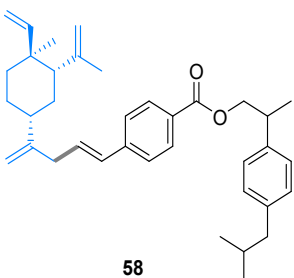

$^{13}\text{C}$  NMR (126 MHz,  $\text{CDCl}_3$ )

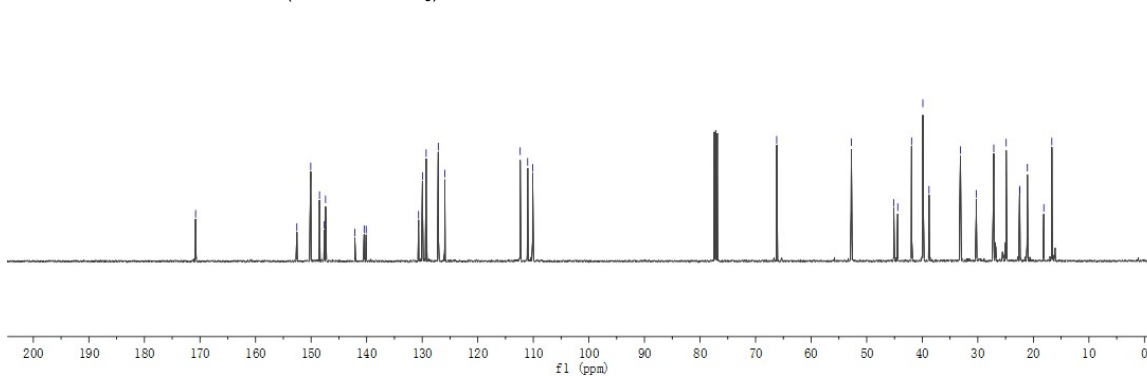

7.98  
7.96  
7.48  
7.40  
6.44  
6.37  
5.82  
5.79  
5.10  
5.10  
4.92  
4.91  
4.89  
4.89  
4.83  
4.82  
4.60  
4.36  
4.34  
3.00  
2.98  
2.02  
2.01  
2.00  
1.98  
1.91  
1.82  
1.81  
1.80  
1.76  
1.74  
1.71  
1.68  
1.61  
1.58  
1.57  
1.56  
1.50  
1.48  
1.47  
1.46  
1.45  
1.34  
1.32  
1.30  
1.29  
1.01  
0.98  
0.97

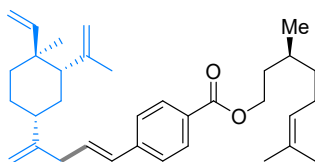

59

<sup>1</sup>H NMR (500 MHz, CDCl<sub>3</sub>)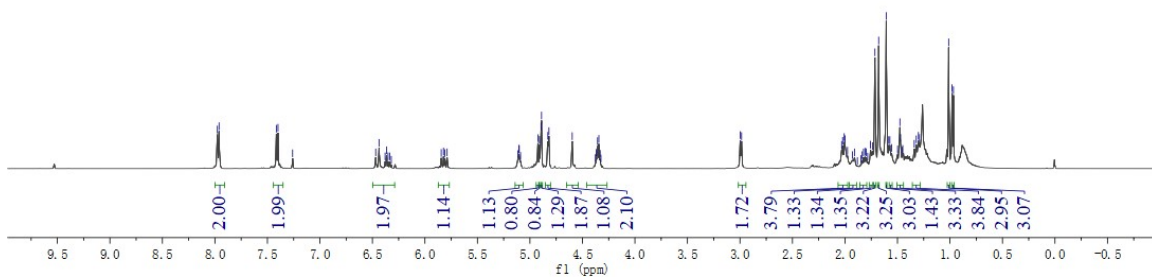

YXY-VE-28-8

C13CPD CDCl3 E:\ \ CCY 31

166.64  
152.66  
150.27  
147.72  
142.14  
131.72  
130.72  
130.00  
125.99  
124.30  
110.08  
109.31  
63.53  
52.87  
44.47  
40.04  
37.13  
35.66  
29.72  
27.30  
25.84  
25.54  
24.93  
19.65  
17.80  
16.75

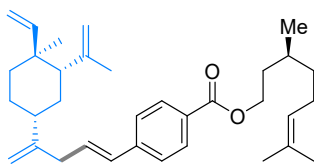

59

<sup>13</sup>C NMR (126 MHz, CDCl<sub>3</sub>)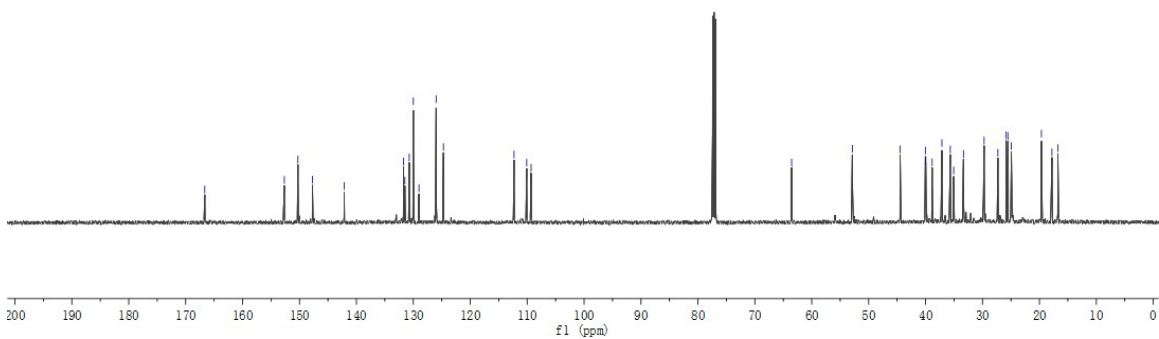

7.98  
7.94  
7.46  
7.39  
5.83  
5.82  
5.81  
5.80  
5.04  
5.00  
4.91  
4.91  
4.90  
4.89  
4.88  
4.88  
4.87  
4.81  
4.72  
4.72  
4.71  
4.69  
4.57  
2.98  
2.17  
2.16  
2.08  
2.02  
2.01  
1.99  
1.98  
1.91  
1.89  
1.70  
1.61  
1.60  
1.59  
1.59  
1.57  
1.55  
1.47  
1.47  
1.46  
1.33  
1.31  
1.29  
1.27  
1.26  
1.00

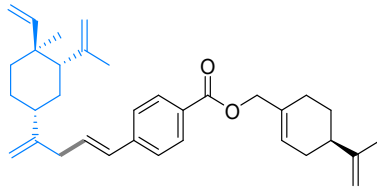

60

 $^1\text{H NMR}$  (500 MHz,  $\text{CDCl}_3$ )
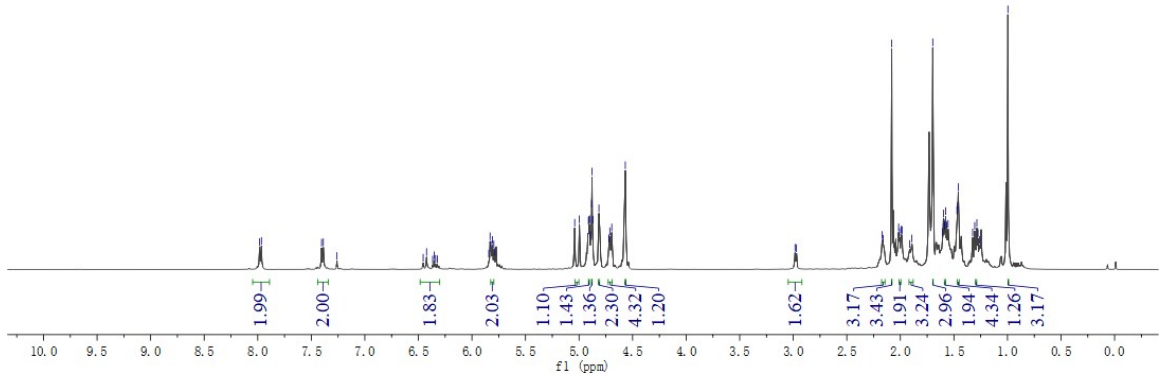

170.78  
154.90  
152.56  
150.06  
148.48  
147.39  
142.18  
132.89  
130.02  
125.95  
122.58  
112.58  
111.01  
110.11  
108.89  
68.77  
66.19  
55.79  
52.75  
48.46  
45.71  
44.41  
41.91  
40.95  
39.88  
38.78  
36.51  
35.00  
33.12  
30.55

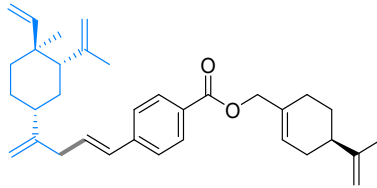

60

 $^{13}\text{C NMR}$  (126 MHz,  $\text{CDCl}_3$ )
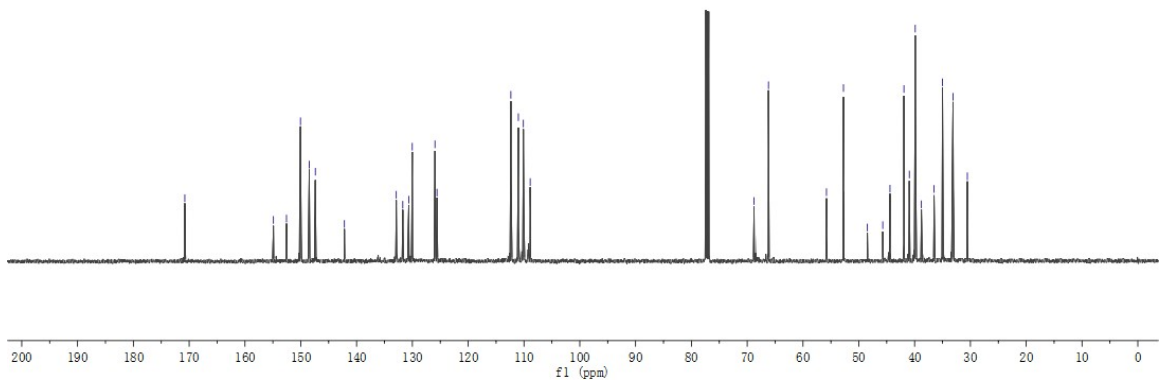

8.11, 8.09, 7.92, 7.89, 7.18, 7.16, 6.92, 6.89, 2.42, 2.40, 2.09, 2.05, 1.96, 1.94, 1.94, 1.93, 1.81, 1.81, 1.80, 1.80, 1.79, 1.78, 1.78, 1.77, 1.67, 1.66, 1.65, 1.55, 1.52, 1.50, 1.50, 1.36, 1.36, 1.35, 1.34, 1.33, 1.32, 1.31, 1.31, 1.30, 1.29, 1.28, 1.27, 1.26, 1.25, 1.25, 0.89, 0.86

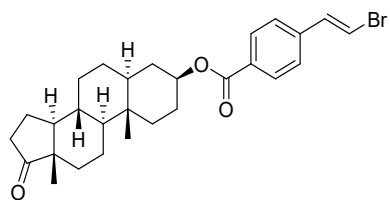

$^1\text{H NMR}$  (500 MHz,  $\text{CDCl}_3$ )

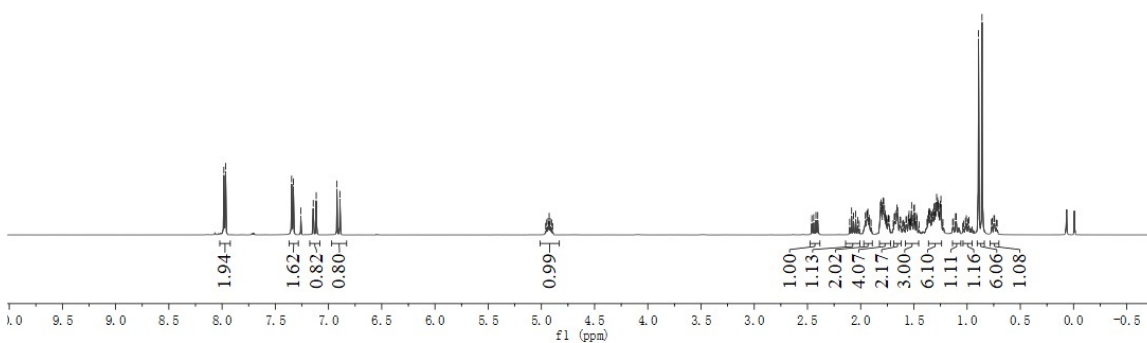

YXI-A029-194-C

C13CPD  $\text{CDCl}_3$  E:\ \ CCY 1

165.73, 140.01, 136.53, 132.10, 130.19, 129.52, 125.99, 109.37, 74.38, 54.44, 51.49, 47.90, 44.83, 36.86, 35.97, 35.82, 35.17, 34.16, 31.66, 30.94, 28.42, 27.63, 21.90, 20.61, 13.94, 12.40

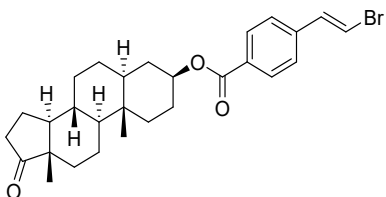

$^{13}\text{C NMR}$  (126 MHz,  $\text{CDCl}_3$ )

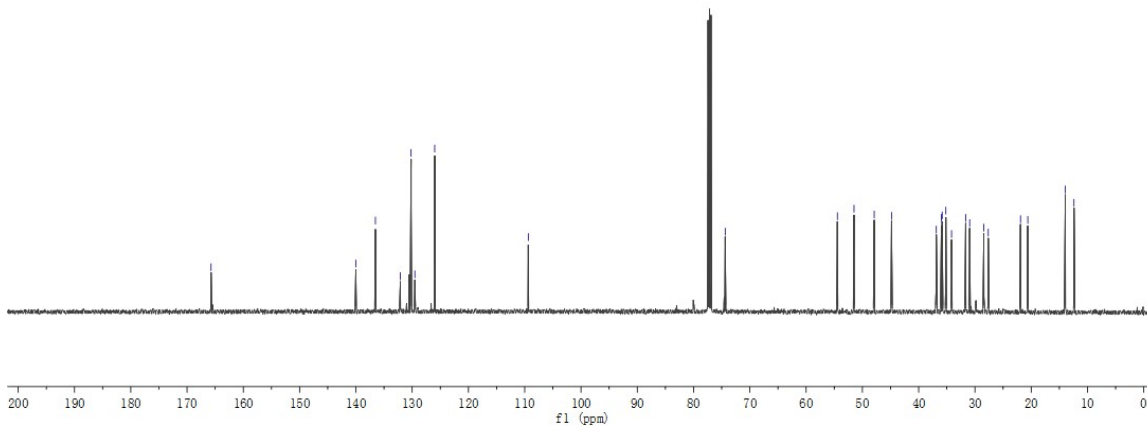



YXY-A029-195.10.fid  
 PROTON CDCl3 E:\ \ CCY 3

7.99  
7.97  
7.38  
7.34  
7.32  
7.30  
7.29  
7.20  
7.19  
7.16  
7.15  
6.82  
6.80  
6.61  
6.59  
4.58  
4.57  
4.18  
4.17  
4.16  
3.44  
3.42  
3.41  
2.94  
2.93  
2.91

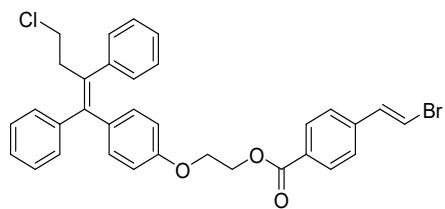

<sup>1</sup>H NMR (500 MHz, CDCl<sub>3</sub>)

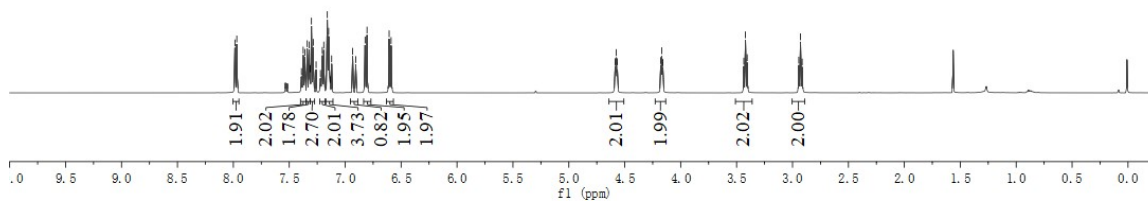

YXY-A029-195-C

C13CPD CDCl3 E:\ \ CCY 2

166.15  
156.85  
136.47  
131.90  
130.42  
129.67  
129.52  
128.51  
128.37  
126.77  
113.98  
109.67  
65.84  
63.55  
42.97  
38.71

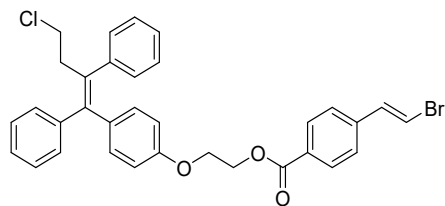

<sup>13</sup>C NMR (126 MHz, CDCl<sub>3</sub>)

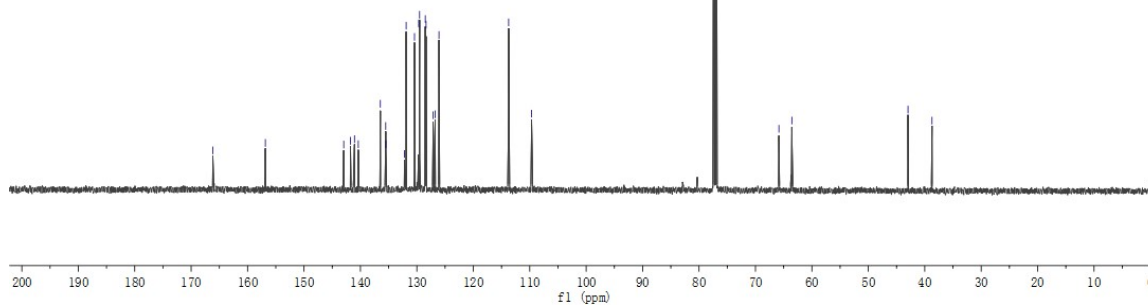

7.26  
5.86  
5.83  
5.82  
5.79  
5.20  
5.04  
4.94  
4.94  
4.93  
4.92  
4.90  
4.90  
4.84  
4.83  
4.83  
4.59  
4.03  
2.25  
2.22  
2.07  
2.06  
2.04  
2.03  
1.72  
1.68  
1.67  
1.67  
1.65  
1.65  
1.64  
1.64  
1.63  
1.61  
1.55  
1.54  
1.52  
1.51  
1.50  
1.49  
1.48  
1.48  
1.47  
1.46  
1.45  
1.44  
1.44  
1.43  
1.01

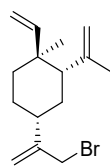**1c'**<sup>1</sup>H NMR (400 MHz, CDCl<sub>3</sub>)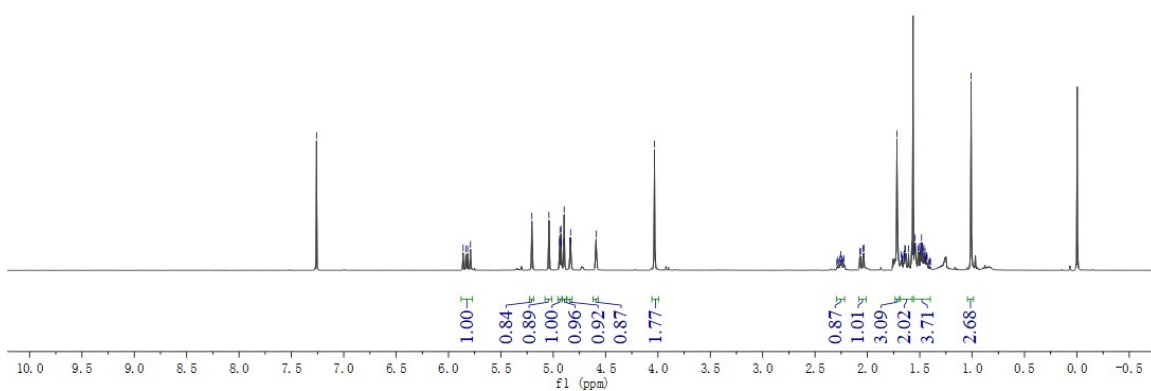BZQSCL  
13C

149.56  
149.04  
147.50

116.42  
113.46  
111.55

51.07  
47.80  
47.52  
40.97  
39.82  
39.67  
33.79  
27.01  
15.77

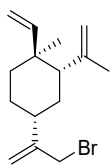**1c'**<sup>13</sup>C NMR (101 MHz, CDCl<sub>3</sub>)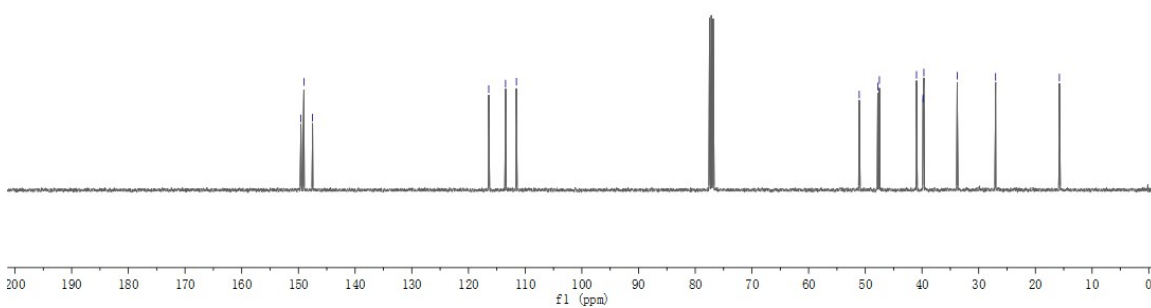

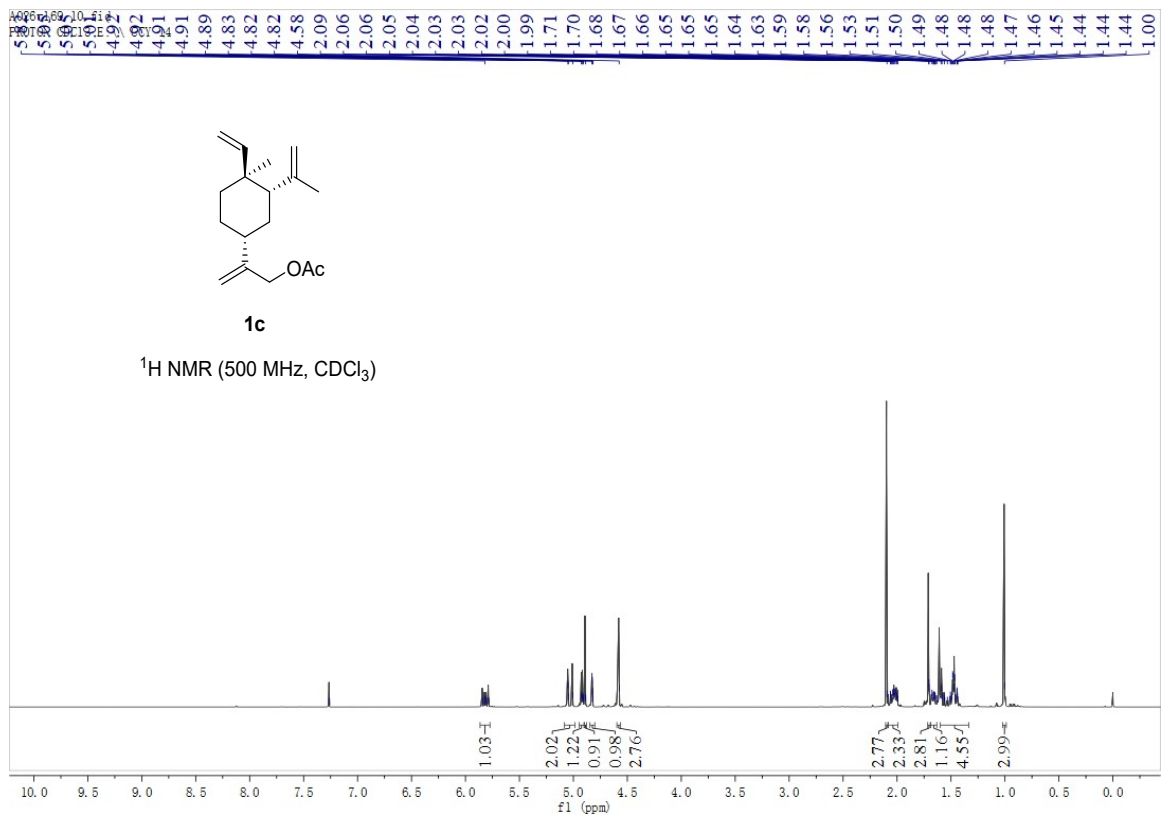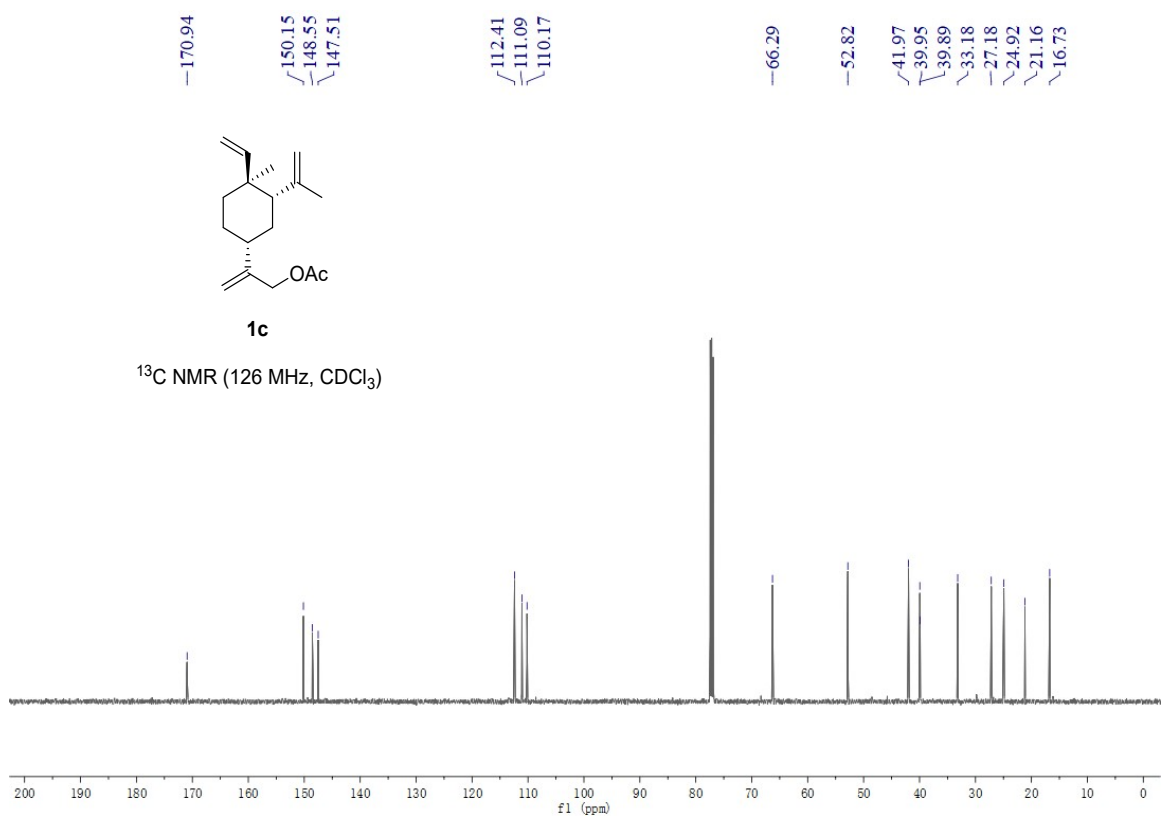

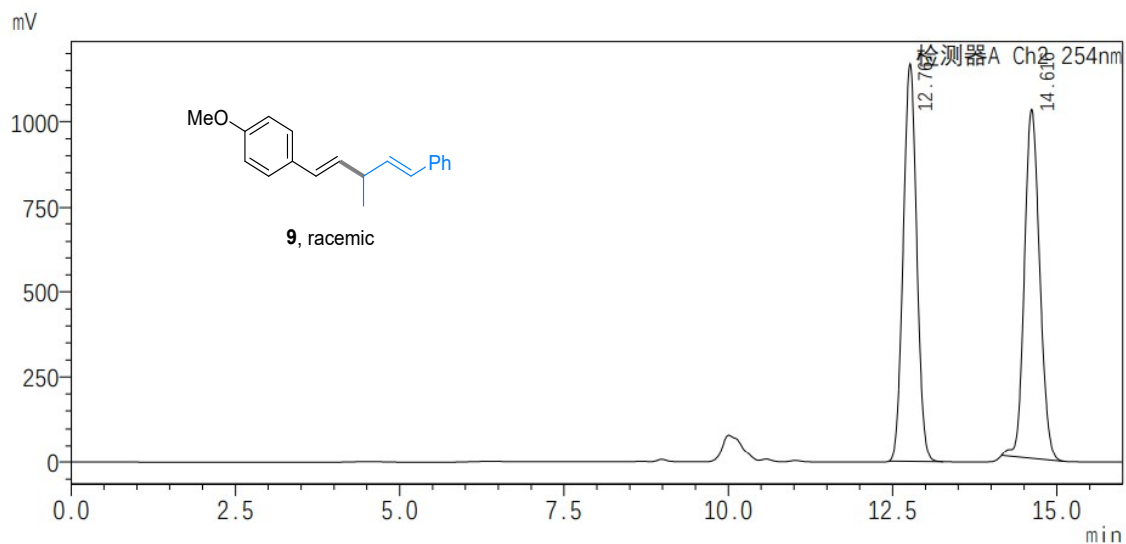

PDA Ch2 254 nm

| Peak # | Resolution Time | Area     | Height  | Area %  | Height % |
|--------|-----------------|----------|---------|---------|----------|
| 1      | 12.767          | 16640490 | 1167181 | 50.043  | 53.255   |
| 2      | 14.616          | 16611791 | 1024494 | 49.957  | 46.745   |
| Total  |                 | 33252281 | 2191675 | 100.000 | 100.000  |

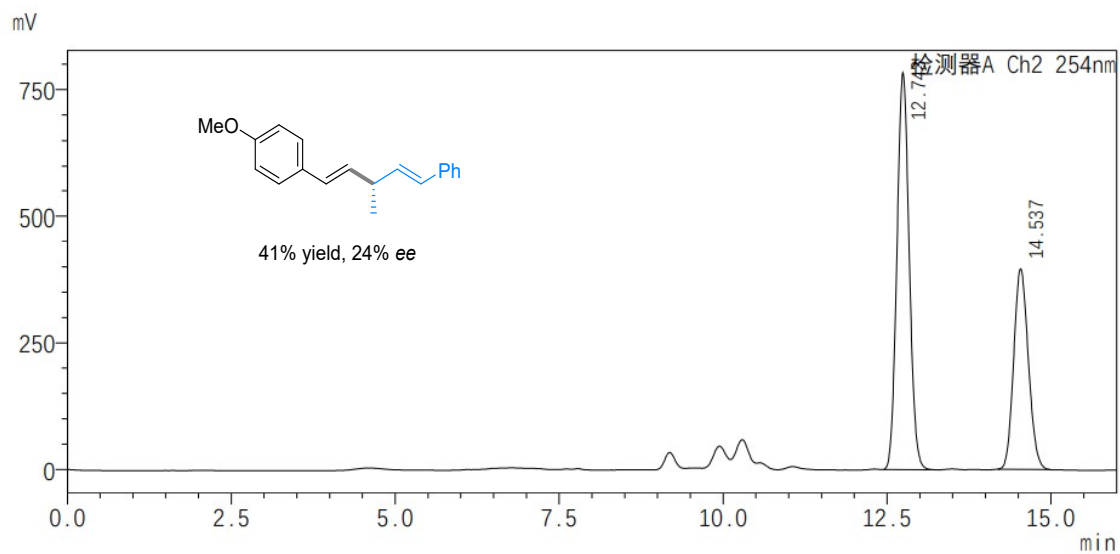

PDA Ch2 254 nm

| Peak # | Resolution Time | Area     | Height  | Area %  | Height % |
|--------|-----------------|----------|---------|---------|----------|
| 1      | 12.743          | 10172598 | 783104  | 62.278  | 66.438   |
| 2      | 14.537          | 6161622  | 395598  | 37.722  | 33.562   |
| Total  |                 | 16334220 | 1178702 | 100.000 | 100.000  |
